# Supplementary material
Source: PubMed Central journal article supplement (PMC6760989)
Supplement: NIHMS1000459-supplement-Supplemental_Information.pdf [file NIHMS1000459-supplement-Supplemental_Information.pdf]

---

## Supporting Information

### **Chemoproteomic Profiling of Phosphoaspartate Modifications in Prokaryotes**

Jae Won Chang, Jeffrey. E. Montgomery, Gihoon Lee, and Raymond. E. Moellering\*

DOI: [10.1002/anie.201809059](https://doi.org/10.1002/anie.201809059)

---

## Table of Contents

1. Synthesis of DBHA Probe (p3)
  - a. Reaction scheme (p3)
  - b. General information of chemicals (p3)
  - c. Synthesis of 1-Azido-4-bromobutane (p3)
  - d. Synthesis of *tert*-butyl-4-azidobutoxycarbamate (p3)
  - e. Synthesis of *tert*-butyl-4-aminobutoxycarbamate (p3)
  - f. Synthesis of *tert*-butyl ((10-(5-methyl-2-oxoimidazolidin-4-yl)-5-oxodecyl)oxy)carbamate (p4)
  - g. Synthesis of 4-(10-(aminooxy)-6-oxodecyl)-5-methylimidazolidin-2-one (DBHA) (p4)
2. Biological experiments (p4)
  - a. Working solutions of DBHA probe (p4)
  - b. *E. coli* growth conditions and proteome harvesting (p4)
  - c. Gel-based analysis of probe-labelled proteins (p4)
  - d. Proteomic sample preparation with DBHA probe (p4)
  - e. TMT labeling with high and low osmolarity proteomes sample (p5)
  - f. Proteomic LC-MS/MS and Data Analysis (p5)
3. Supplementary Figures and legends of tables (p7)
4. Author contributions (p10)

## Synthesis of DBHA probe

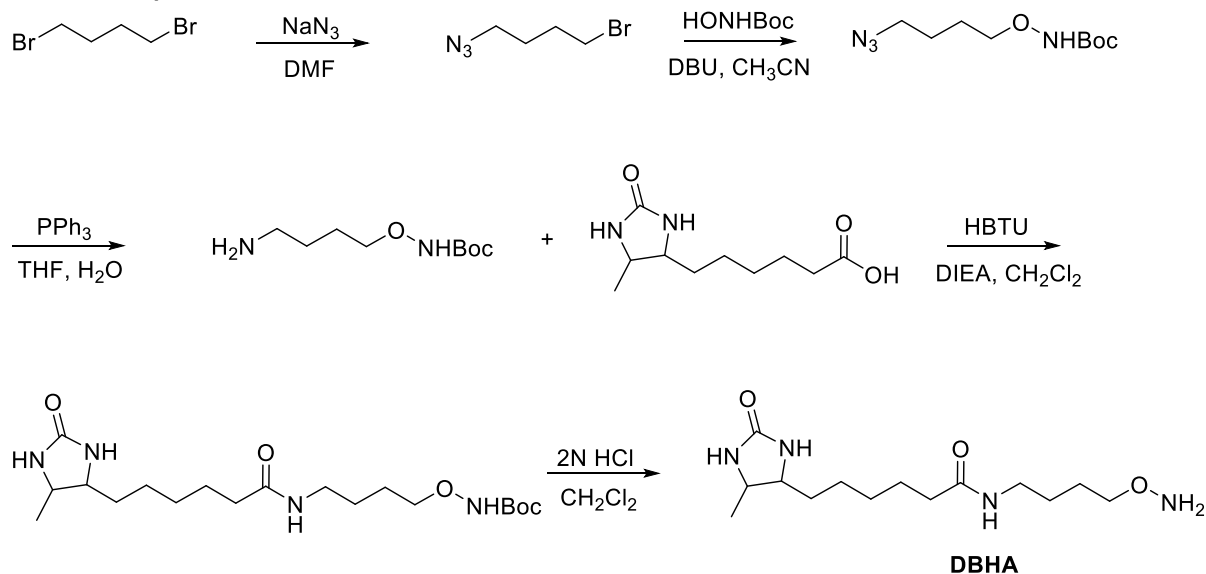

**General Information:** All commercially available chemicals were obtained from Aldrich, Acros, Fisher, Fluka and were used without further purification, except where noted. Dry solvents were obtained by passing through activated alumina columns. All reactions were carried out under inert nitrogen atmosphere using oven-baked glassware unless otherwise noted. Flash chromatography was performed using 230-400 mesh silica gel 60. NMR spectra were generated on a Bruker 400 MHz instrument. Chemical shifts were recorded in ppm relative to tetramethylsilane (TMS) with multiplicities given as s (singlet), bs (broad singlet), d (doublet), t (triplet), dt (doublet of triplets), q (quadruplet), qd (quadruplet of doublets), m (multiplet).

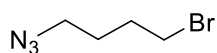

### 1-Azido-4-bromobutane.

Sodium azide (684 mg, 10.525 mmol) was added to a solution of 1,4-dibromobutane (2.5 g, 11.577 mmol) in dry DMF (20 mL) and allowed to stir for overnight at 50 °C under N<sub>2</sub> gas. To the reaction mixture was added cold H<sub>2</sub>O and extracted with ethyl acetate 3 times. The organic layer was washed with brine two times and then dried over MgSO<sub>4</sub>. The crude mixture after solvent evaporation was purified by silica gel flash chromatography (5% EtOAc/hexanes) to give 1-Azido-4-bromobutane as a clear oil (1.6 g, 80%).  
<sup>1</sup>H NMR (400 MHz, CDCl<sub>3</sub>) δ 3.40 (t, *J* = 6.6 Hz, 2H), 3.31 (t, *J* = 6.6 Hz, 2H), 2.05-1.94 (m, 2H), 1.78-1.74 (m, 2H).

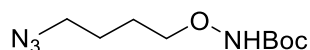

### *tert*-butyl-4-azidobutoxycarbamate.

*N*-Boc-hydroxylamine (1.3 g, 10.105 mmol) and DBU (2.2 g, 14.435 mmol) were added to a solution of 1-Azido-4-bromobutane (1.3 g, 7.217 mmol) in dry CH<sub>3</sub>CN (25 mL) and allowed to stir for 24 hr at 50 °C under N<sub>2</sub> gas. The reaction mixture was concentrated, added to H<sub>2</sub>O and extracted with CH<sub>2</sub>Cl<sub>2</sub> three times. The organic layer was washed with brine two times and then dried over MgSO<sub>4</sub>. The crude mixture after solvent evaporation was purified by silica gel flash chromatography (10% EtOAc/hexanes) to give *tert*-butyl-4-azidobutoxycarbamate as a clear oil (1.2 g, 75%).

<sup>1</sup>H NMR (400 MHz, CDCl<sub>3</sub>) δ 3.82 (t, *J* = 6.6 Hz, 2H), 3.31-3.25 (m, 2H), 1.72-1.68 (m, 4H), 1.42 (s, 9H); HRMS (ESI+) *m/z* calculated for [M+H]<sup>+</sup> C<sub>9</sub>H<sub>19</sub>N<sub>4</sub>O<sub>3</sub>: 231.2760, found 231.2758.

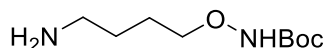

### *tert*-butyl-4-aminobutoxycarbamate.

Triphenylphosphine (666 mg, 2.540 mmol) was added to a solution of *tert*-butyl-4-azidobutoxycarbamate (450 mg, 1.954 mmol) in dry THF (8 mL) and H<sub>2</sub>O (0.2 mL). The reaction mixture was stirred at room temperature for 12 hr. After removing THF under reduced pressure, the residue was purified by silica gel flash chromatography (85/15:CH<sub>2</sub>Cl<sub>2</sub>/MeOH) to give *tert*-butyl-4-aminobutoxycarbamate as a pale-yellow liquid (250 mg, 63%).

<sup>1</sup>H NMR (400 MHz, CDCl<sub>3</sub>) δ 3.82 (t, *J* = 6.6 Hz, 2H), 2.74 (t, *J* = 6.6 Hz, 2H), 1.62-1.60 (m, 2H), 1.52-1.46 (m, 2H), 1.43 (s, 9H); HRMS (ESI+) *m/z* calculated for [M+H]<sup>+</sup> C<sub>9</sub>H<sub>21</sub>N<sub>2</sub>O<sub>3</sub>: 205.2780, found 205.2782.

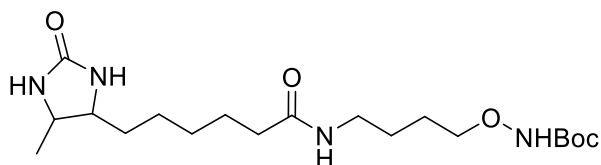

#### **tert-butyl ((10-(5-methyl-2-oxoimidazolidin-4-yl)-5-oxodecyl)oxy)carbamate.**

Desthiobiotin (46 mg, 0.214 mmol), HBTU (122 mg, 0.321 mmol) and DIEA (83 mg, 0.642 mmol) were added to a solution of *tert*-butyl-4-aminobutoxycarbamate (48 mg, 0.235 mmol) in dry CH<sub>2</sub>Cl<sub>2</sub> (2 mL). The reaction mixture was stirred at room temperature overnight. The mixture was added to H<sub>2</sub>O and extracted with CH<sub>2</sub>Cl<sub>2</sub> three times. The organic layer was washed with brine two times and then dried over MgSO<sub>4</sub>. The crude mixture after solvent evaporation was purified by silica gel flash chromatography (90/10:CH<sub>2</sub>Cl<sub>2</sub>/MeOH) to give *tert*-butyl ((10-(5-methyl-2-oxoimidazolidin-4-yl)-5-oxodecyl)oxy)carbamate as a pale-yellow liquid (70 mg, 82%).

<sup>1</sup>H NMR (400 MHz, CDCl<sub>3</sub>) δ 8.30 (bs, 1H), 6.80 (m, 1H), 6.18 (s, 1H), 5.42 (s, 1H), 3.87-3.84 (m, 3H), 3.70-3.68 (m, 1H), 3.27-3.25 (m, 2H), 2.84 (bs, 1H), 2.21-2.17 (t, *J* = 7.2 Hz, 2H), 1.64-1.63 (m, 5H), 1.39 (s, 9H), 1.37-1.26 (m, 6H), 1.12-1.10 (d, *J* = 6.6 Hz, 3H); HRMS (ESI+) *m/z* calculated for [M+H]<sup>+</sup> C<sub>19</sub>H<sub>37</sub>N<sub>4</sub>O<sub>5</sub>: 401.2764, found 401.2769.

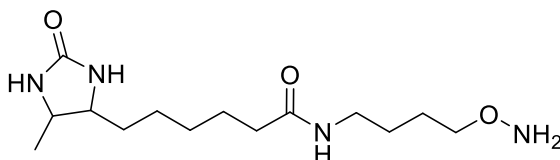

#### **4-(10-(aminooxy)-6-oxodecyl)-5-methylimidazolidin-2-one (DBHA).**

2 N HCl (0.13 mL, 0.262 mmol) was slowly added to a solution of *tert*-butyl ((10-(5-methyl-2-oxoimidazolidin-4-yl)-5-oxodecyl)oxy)carbamate (70 mg, 0.175 mmol) in dry CH<sub>2</sub>Cl<sub>2</sub> at 0 °C. The reaction mixture was stirred at 0 °C for 1 h and then warmed up to room temperature. The mixture was stirred at room temperature overnight and reaction completion was monitored by thin layer chromatography. After removing solvent under reduced pressure, the crude mixture was dissolved in MeOH and added to Et<sub>2</sub>O. The residue was collected by filtration and washed with Et<sub>2</sub>O (5 mL) three times to give 4-(10-(aminooxy)-6-oxodecyl)-5-methylimidazolidin-2-one (DBHA) as a white solid (48 mg, 92%).

<sup>1</sup>H NMR (400 MHz, *d*<sub>6</sub>-DMSO) δ 10.84 (bs, 2H), 7.82 (bs, 1H), 3.98-3.95 (t, *J* = 6.2 Hz, 2H), 3.61-3.58 (m, 1H), 3.49-3.47 (m, 1H), 3.11-3.08 (t, *J* = 6.6 Hz, 2H), 2.14-2.11 (t, *J* = 7.2 Hz, 2H), 1.59-1.47 (m, 7H), 1.39-1.22 (m, 6H), 1.00-0.98 (d, *J* = 6.6 Hz, 3H); HRMS (ESI+) *m/z* calculated for [M+H]<sup>+</sup> C<sub>14</sub>H<sub>29</sub>N<sub>4</sub>O<sub>3</sub>: 301.2240, found 301.2242.

#### **Working solutions of DBHA probe.**

Working solutions (~1 M) were prepared in H<sub>2</sub>O from the DBHA chloride salts. The pH was titrated to 6.5–7 with concentrated sodium hydroxide using Colorphast pH indicator strips from pH 5–10 with 0.5 pH unit accuracy (EMD). Solutions were used immediately.

#### ***E. coli* growth conditions and proteome harvesting.**

BL21 *E. coli* were transformed with empty pET28 vector to confer kanamycin-resistance, ensuring the purity of cultures studied. A 10 mL culture of lysogeny broth (LB, Fisher) containing kanamycin (kan, 50 µg/mL) was inoculated with a single colony from a fresh LB/kan agar plate. After 24 hr growth at 37 °C, 225 rpm, Cells were collected by centrifugation at mid-log phase (OD<sub>600</sub> = 0.6) for 30 min at 4000 g, 4 °C and washed three times with ice-cold PBS. Cell pellets were resuspended in 2 mL ice-cold lysis buffer containing 6 M urea, protease and phosphatase inhibitors. Lysis was performed by sonication on ice, for 3 min at 30% amplitude, 1 s on, 5 s off. Following centrifugation for 15 min at 16000 g, 4 °C, protein concentration was measured by BCA assay (Pierce, #23225). Cell pellets were used immediately for gel-based or proteomic experiments.

#### **Gel-based analysis of probe-labelled proteins.**

Proteomes were diluted to 1 mg/mL in 6 M urea (30 µL total reaction volume) and incubated with DBHA probe at the indicated concentrations (1 µL of a 30x stock in H<sub>2</sub>O) for 1 hr at 37 °C. Reactions were quenched with 4x SDS-PAGE loading buffer, followed by heating to 95 °C for 5 minutes, cooling to room temperature, and gel electrophoresis on NuPAGE Novex 4-12% Bis-Tris Protein Gels (Invitrogen, NP0322BOX). Half of each probe-labeled aliquot was set aside for Coomassie staining for protein loading comparison. PAGE gels were transferred onto nitrocellulose membranes, blocked in 2% BSA in TBS containing 0.1% tween-20 (TBST) and probed with IRDye®R-800CW Streptavidin (LI-COR, #926-32230, 1:1000). Blots were imaged on the OdysseyCLxImager (LI-COR).

#### **Proteomic sample preparation with DBHA probe**

Proteomes were diluted to 5 mg/mL in 6M urea (500 µL total reaction volume) and incubated with DBHA probe at the indicated concentrations for 1 hr at 37 °C. Sequential addition of and mixture with pre-chilled methanol (MeOH, 2 mL), chloroform (CHCl<sub>3</sub>, 0.5 mL) and H<sub>2</sub>O (1 mL) on ice quenched the reaction. The precipitated proteome was centrifuged (4,000 g, 5 min, 4 °C) to fractionate the protein interphase from the organic and aqueous solvent layers. The protein pellet was washed with cold 1:1 MeOH:CHCl<sub>3</sub> (3 × 1 mL), mildly sonicated in cold 4:1 MeOH:CHCl<sub>3</sub> (2.5 mL) and pelleted once more by centrifugation (4,000 g, 5 min, 4 °C) to ensure excess DBHA probe was efficiently removed. The remaining protein precipitate was dissolved by mild sonication in a freshly prepared solution of proteomics-grade 6 M urea (500 µL). Disulfides were reduced with DTT (10 µL, 500 mM) for 30 min at 65 °C, and then alkylated by iodoacetamide (40 µL, 1 M) for 30 min at ambient temperature protected from light. After reduction and alkylation, one more time washed with MeOH/CHCl<sub>3</sub> to remove excess reagents. The protein pellet was resuspended in 500 µL digestion buffer containing 2 M urea and 1M Tris pH 8.0 (49:1, 2M Urea/1M Tris pH 8.0 ratio), CaCl<sub>2</sub> (1 mM) and digested with sequencing grade trypsin (10 µg; Thermo Pierce) at 37 °C while rotating for 4 hr. After 4 hr, the solution was incubated with streptavidin agarose resin (50 µL of 50% High Capacity Streptavidin resin, Pierce) for overnight at ambient temperature on a rotator. The streptavidin beads were collected by centrifugation (1,400 g, 2 min) and sequentially washed with PBS (5 × ~10 mL), and H<sub>2</sub>O (5 × ~10 mL) to remove unbound protein, and small molecules. DBHA-modified peptides were eluted by adding 75 µL of Elution buffer (1:1 ACN/ H<sub>2</sub>O, 0.1% TFA), incubated for 3 minutes, and transfer the eluate to a new Protein LoBind tube (Eppendorf). Elution was repeated three times total. The samples were lyophilized and stored at –80 °C until analyzed or dissolved in LC-MS/MS Buffer A (H<sub>2</sub>O with 0.1% formic acid, LC-MS grade, Sigma Aldrich) for LC-MS/MS analysis.

#### **TMT labeling with high and low osmolarity proteomes sample.**

For osmolarity studies, Nutrient broth (NB, Sigma #70122) was made, autoclaved, treated with kan to 50 µg/mL, and supplemented with 20% w/v sucrose, or left unmodified. After 16 hr of growth at 37 °C, 225 rpm, flasks of 300 mL LB or NB media were inoculated 1:1000 with overnight culture. After 24 hr growth at 37 °C, 225 rpm, Cells were collected by centrifugation at mid-log phase (OD<sub>600</sub> =

0.6) for 30 min at 4000 g, 4 °C and washed three times with ice-cold PBS, and lysed as for all proteome preparations. "High osmolarity" and "Low osmolarity" proteomes were diluted to 5 mg/mL in 6M urea (500  $\mu$ L total reaction volume) and incubated with DBHA probe at the indicated concentrations for 1 hr at 37 °C. Washed proteomes with MeOH/CHCl<sub>3</sub> to remove excess DBHA probe. The protein precipitate was resuspended by mild sonication in a freshly prepared solution of proteomics-grade 6 M urea (500  $\mu$ L). Disulfides were reduced with DTT (10  $\mu$ L, 500 mM) for 30 min at 65 °C. Reduced thiols were then alkylated by iodoacetamide (40  $\mu$ L, 1 M) for 30 min at ambient temperature protected from light. The solution was diluted with PBS (~5 mL) and incubated with pre-equilibrated streptavidin agarose resin (50  $\mu$ L column volume, Pierce) for ~1.5–2 hr at ambient temperature on a rotator. The streptavidin beads were collected by centrifugation (1,400 g, 1–2 min) and sequentially washed with PBS (3  $\times$  ~10 mL), and H<sub>2</sub>O (3  $\times$  ~10 mL) to remove unbound protein and small molecules. The resin was transferred to a Protein LoBind tube (Eppendorf or BioPioneer) and bound proteins were digested on-bead overnight at 37 °C in ~200  $\mu$ L total volume containing sequencing grade porcine trypsin (4  $\mu$ g, Promega) in the presence of urea (2 M Urea in PBS) and CaCl<sub>2</sub> (1 mM). The proteolyzed supernatant was transferred to a fresh Protein LoBind tube and acidified with formic acid (5%) to inactivate trypsin. Peptides were then desalted with ZipTip C18 tips (100  $\mu$ L, Millipore), dried under vacuum, resuspended with LC-MS grade water (Sigma Aldrich) and then lyophilized. Lyophilized peptides were labeled with 10-plex isobaric tandem mass tags (90406, Thermo Scientific) according to manufacturer's protocol with slight modification. TMT reagents were reconstituted to 8 mg/mL in anhydrous acetonitrile (Sigma) and added to lyophilized peptides dissolved in 100  $\mu$ L of 200 mM HEPES buffer, pH 8.0 (~8:1 reagent/peptide ratio). Labeling reaction was carried out in room temperature for 1 hr with gentle shaking, and quenched with 5  $\mu$ L of 5% hydroxylamine (Thermo Scientific). Labeled peptides were combined into a single pool per experiment, acidified with formic acid (pH 2-3), desalted using ZipTip C18 tips (100  $\mu$ L, Millipore). The samples were lyophilized and stored at -80 °C until analyzed or dissolved in LC-MS/MS Buffer A (H<sub>2</sub>O with 0.1% formic acid, LC-MS grade, Sigma Aldrich) for LC-MS/MS analysis.

For bulk protein level quantification by LC-MS/MS, "High osmolarity" and "Low osmolarity" proteomes were diluted to 5 mg/mL in 6M urea (500  $\mu$ L total reaction volume). Reduction and alkylation of cysteine residues were performed by addition of DTT (10  $\mu$ L, 500 mM) for 30 min at 65 °C, followed iodoacetamide (40  $\mu$ L, 1 M) for 30 min at ambient temperature protected from light. The proteome solution was diluted 4-fold with ammonium bicarbonate solution (50 mM, pH 8.0), CaCl<sub>2</sub> added (1 mM) and digested with sequencing grade trypsin (~1:100 enzyme/protein ratio; Thermo Pierce) at 37 °C while rotating overnight. Peptide digestion reactions were quenched by acidification to pH 2-3 with 1% formic acid, and peptides were then desalted with Sep-Pak C18 cartridges (50mg, Waters), dried under vacuum, resuspended with LC-MS grade water (Sigma Aldrich) and then lyophilized. TMT labeling samples were prepared as described above.

#### **Proteomic LC-MS/MS and Data Analysis.**

LC-MS/MS experiments were performed with an Easy-nLC 1000 ultra-high pressure LC system (ThermoFisher) using a PepMap RSLC C18 column (column: 75  $\mu$ m  $\times$  15 cm; 3  $\mu$ m, 100 Å) coupled to a Q Exactive HF orbitrap and Easy-Spray nanosource (ThermoFisher). Enriched peptides with DBHA probe (500 ng) were injected onto the column in buffer A (0.1% Formic acid water) and separated using the following linear gradient of buffer B (0.1% Formic acid acetonitrile) at 300 nL/min: 0-2% buffer B over 10 minutes, 2-40% buffer B over 120 minutes, 40-70% buffer B over 10 minutes, 70-100% buffer B over 5 minutes, keep 100% buffer B over 5 minutes, re-stabilized to 0% buffer B over 10 minutes, keep 0% buffer B over 5 minutes, 0-100% buffer B over 5 minutes, keep 100% buffer B over 5 minutes, re-stabilized to 0% buffer B over 5 minutes, and then keep 0% buffer B over 5 minutes. MS/MS spectra were collected from 0 to 150 minutes using a data-dependent, top-20 ion setting. Data acquisition for differential modification searches were performed with the following settings: Full MS scans were acquired at a resolution of 120,000, scan range of 400-1600 m/z, maximum IT of 50 ms, AGC target of 1e6, and data type in profile mode. Sequencing was performed by HCD fragmentation with a resolution of 15,000, AGC target of 1e5, maximum IT of 30 ms, NCE of 26, and data type in centroid mode. Isolation window for precursor ions was set to 1.5 m/z with an underfill ratio of 0.5%. Peptides with charge state >5, 1 and undefined were excluded and dynamic exclusion was set to 5.0 seconds. Furthermore, S-lens RF level was set to 60 with a spray voltage value of 2.60kV.

TMT-labeled digested peptides were injected onto the column and separated using the following gradient of buffer B (0.1% Formic acid acetonitrile) at 300 nL/min: 0-5% buffer B in 5 minutes, 5-32% buffer B in 115 minutes, 32-90% buffer B over 6 minutes, and hold at 90% for 20mins. MS/MS spectra were collected from 0 to 150 minutes using a data-dependent, top-10 ion setting with the following settings: full MS scans were acquired at a resolution of 120,000, scan range of 375-1500 m/z, maximum IT of 60 ms, AGC target of 1e6, and data collection in profile mode. MS2 scans was performed by HCD fragmentation with a resolution of 60,000, AGC target of 1e5, maximum IT of 60 ms, NCE of 30, and data type in centroid mode. Isolation window for precursor ions was set to 1.0 m/z with an underfill ratio of 0.5%. Peptides with charge state 1 and undefined were excluded and dynamic exclusion was set to 20 seconds. Furthermore, S-lens RF level was set to 60 with a spray voltage value of 2.60kV and ionization chamber temperature of 300°C.

For Enriched peptides with DBHA, MS2 files were generated and searched using the ProLuCID algorithm in the Integrated Proteomics Pipeline (IP2) software platform. *E. coli* proteome data were searched using a concatenated target/decoy UniProt database (UniProt\_E\_coli\_02-14-2011\_reversed.fasta). Basic searches were performed with the following search parameters: HCD fragmentation method; monoisotopic precursor ions; high resolution mode (3 isotopic peaks); precursor mass range 600-6000 and initial fragment tolerance at 600 p.p.m. C-terminal enzyme cleavage specificity at lysine and arginine residues with 3 missed cleavage sites permitted; static modification of +57.02146 on cysteines (carboxyamidomethylation); two total differential modification sites per peptide including oxidized methionine (+15.9949), pD-modified aspartic acid (+282.2056); primary scoring type by XCorr and secondary by Zscore; minimum peptide length of six residues with a candidate peptide threshold of 500. A minimum of one peptide per protein and half-tryptic peptide specificity were required. Starting statistics were performed with a  $\Delta$ mass cutoff = 10 p.p.m. with modstat, and trypstat settings. False-discovery rates of peptide (sfp) were set to 0%, peptide modification requirement (-m) was set to 0, and spectra display mode (-t) was set to 1. Through subsequent FP-rate adjustment, filtering according to Xcorr (>2.0) and  $\Delta$ Cn (>0.2) statistics, and manual removal of peptides containing singleton pD-modified peptides containing more than one missed tryptic site, false-positive rates of less than 0.8% were achieved in individual technical replicates. The target list was further refined by requiring that each DBHA-modification site was detected in a minimum of six of eight technical replicates in the 10 mM DBHA dataset (4 biological samples  $\times$  2 technical runs), or four of six technical replicates (3 biological samples  $\times$  2 technical runs) in the 100 mM DBHA dataset. These combined filters place the realized false positive rate below 0.1%.

For TMT-labeled digested peptides, basic searches were performed with the following search parameters: HCD fragmentation method; monoisotopic precursor ions; high resolution mode (3 isotopic peaks); precursor mass range 600- 6,000 and initial fragment tolerance at 600 p.p.m.; enzyme cleavage specificity at C-terminal lysine and arginine residues with 3 missed cleavage sites permitted; static modification of +57.02146 on cysteine (carboxyamidomethylation), +229.1629 on N-terminal and lysine for TMT-10-plex tag; 2

---

differential modification sites per peptide, including oxidized methionine (+15.9949), and pD-modified aspartic acid (+282.2056); primary scoring type by XCorr and secondary by Zscore; minimum peptide length of six residues with a candidate peptide threshold of 500. A minimum of one peptide per protein and half-tryptic peptide specificity were required. Starting statistics were performed with a  $\Delta$ mass cutoff = 10 p.p.m. with modstat, and trypstat settings. False-discovery rates of peptide (sfp) were set to 0%, peptide modification requirement (-m) was set to 1, and spectra display mode (-t) was set to 1. TMT quantification was performed using the isobaric labeling 10-plex labeling algorithm, with a mass tolerance of 5.0 p.p.m. or less in cases where co-eluting peptide interfere. Reporter ions 129.13779, 130.134825 were used for relative quantification. In general, all quantified peptides have mass error of < 5 p.p.m..

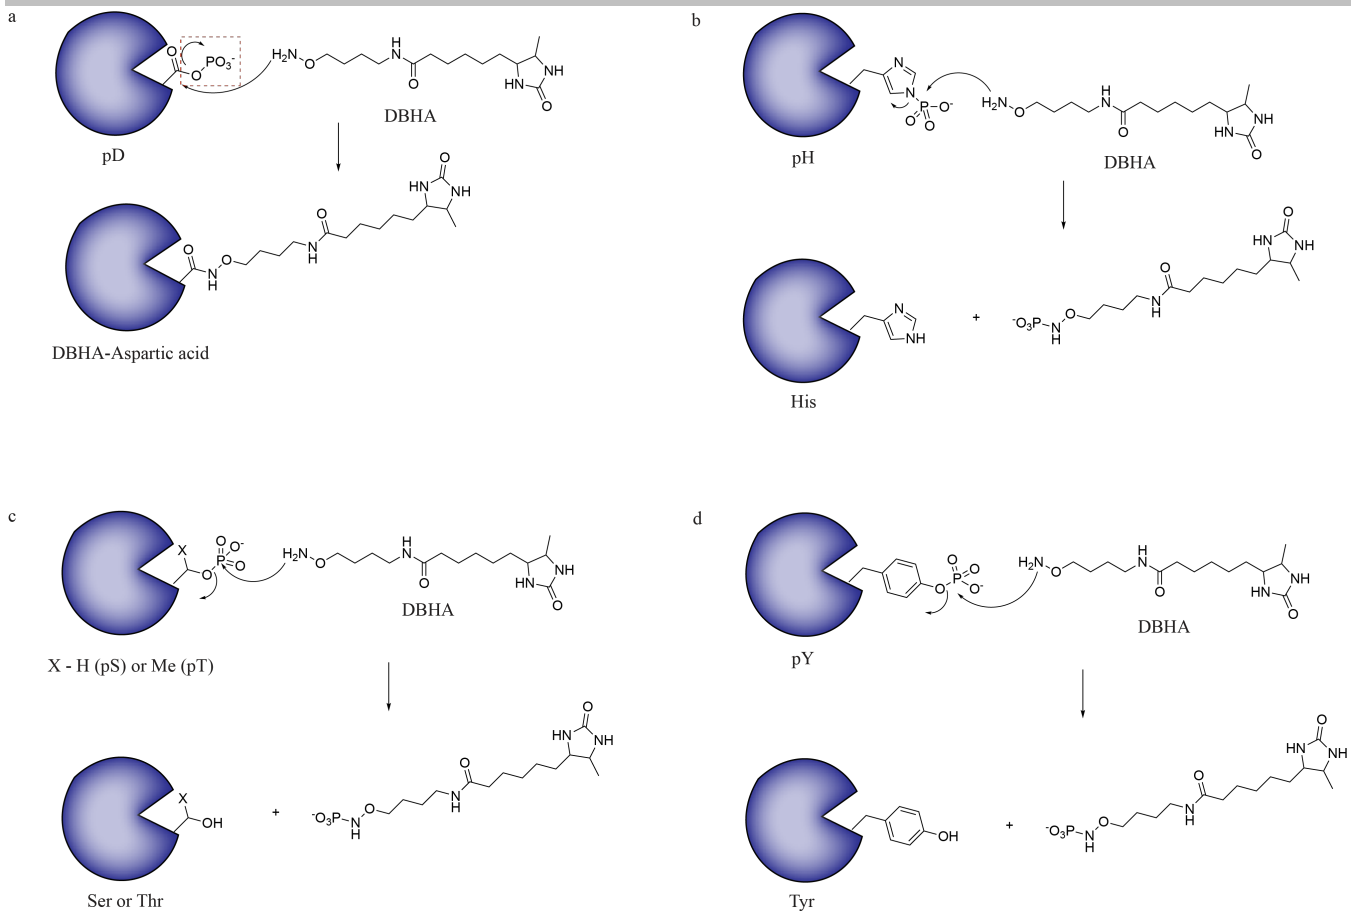

**Supplemental Figure 1.** Schematic depicting the peptide-level identification of DBHA-modification sites. DBHA-treated proteomes are reduced and alkylated in urea, trypsinized, enriched on streptavidin-agarose, modified peptides are eluted in 1:1 CH<sub>3</sub>CN/H<sub>2</sub>O with 0.1% TFA, and peptides are desalted for LC-MS/MS detection. Differential modification searching for DBHA-modified aspartic acids results in modification site identification.

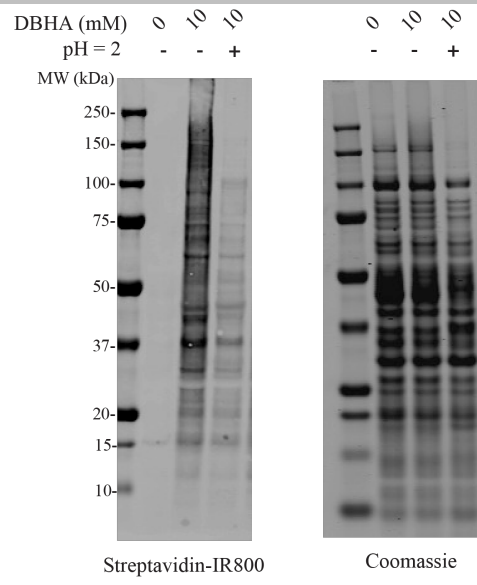

**Supplemental Figure 2.** Schematic depicting the peptide-level identification of DBHA-modification sites. DBHA-treated proteomes are reduced and alkylated in urea, trypsinized, enriched on streptavidin-agarose, modified peptides are eluted in 1:1 CH<sub>3</sub>CN/H<sub>2</sub>O with 0.1% TFA, and peptides are desalted for LC-MS/MS detection. Differential modification searching for DBHA-modified aspartic acids results in modification site identification.



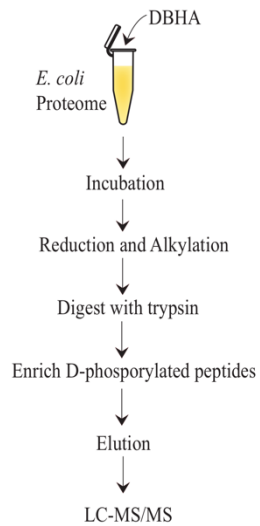

**Supplemental Figure 3.** Schematic depicting the peptide-level identification of DBHA-modification sites. DBHA-treated proteomes are reduced and alkylated in urea, trypsinized, enriched on streptavidin-agarose, modified peptides are eluted in 1:1 CH<sub>3</sub>CN/H<sub>2</sub>O with 0.1% TFA, and peptides are desalted for LC-MS/MS detection. Differential modification searching for DBHA-modified aspartic acids results in modification site identification.

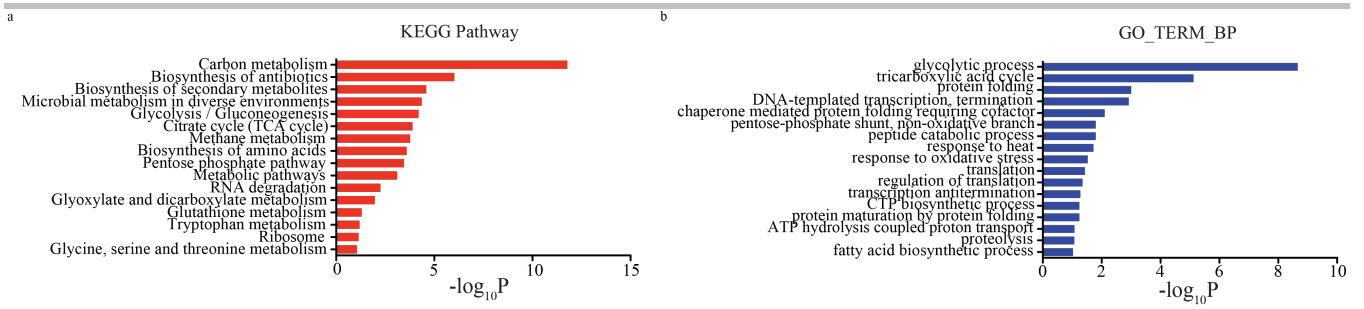

**Supplemental Figure 4.** All significantly enriched KEGG pathways and Gene-ontology biological process categories among DBHA-modified proteins.

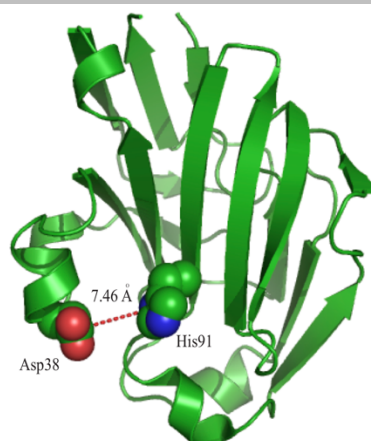

**Supplemental Figure 5.** Crystal structure of the *E. coli* histidine kinase protein Crr is shown with relevant residues (PDB: 1F3G). Histidine 91 is a known pHis site, and is located in high proximity to D38, which was detected with a DBHA-modification in our dataset, suggesting that transient phosphotransfer may occur and result in DBHA labeling.

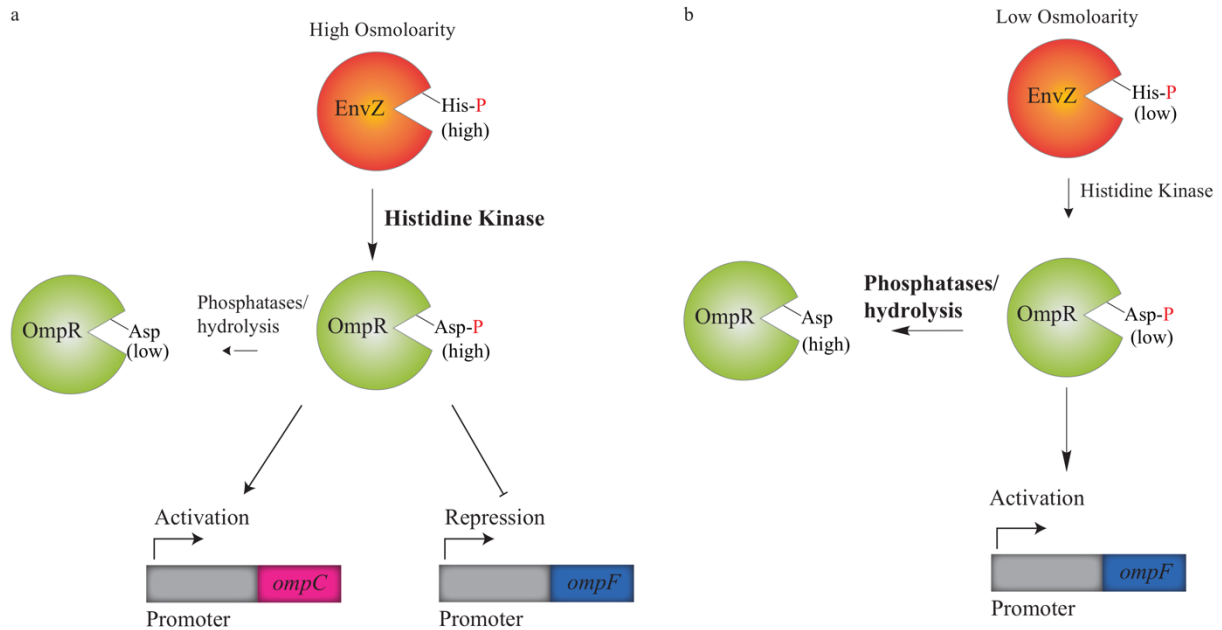

**Supplementary Figure 6.** Schematic diagram of EnvZ/OmpR signaling in response to altered osmolarity. Briefly, high osmolarity results in increased OmpR phosphorylation, followed by transcriptional repression of OmpF, and activation of OmpC.

**Supplementary Table 1.** Comprehensive list of DBHA-modified proteins and peptides. All modification sites were detected in at last four LC-MS/MS replicate runs and exhibited suitable spectral statistics, as described in Methods.

**Supplementary Table 2.** Quantitative proteomic profiling of changes to protein level and DBHA-enrichment in response to high osmolarity. All ratios depict the aggregate of TMT channel quantification of individual tryptic peptides from replicate runs.

## Author Contributions

J.W.C. and R.E.M. conceived the study. J.W.C. designed, performed and analyzed chemical syntheses, biochemical experiments, cell-based experiments, mass spectrometry experiments, and analyzed data. G.L. designed, performed and analyzed chemical syntheses and mass spectrometry experiments. J.E.M. performed and analyzed cell-based and mass spectrometry experiments. R.E.M. supervised the study, designed and analyzed experiments, and wrote the manuscript. All authors contributed to writing the manuscript.

**Supplementary Table 1**

| Protein Descriptions                                                                 | sequence                                                      | Charge State | XCorr    | DelCN    | Conf% | Calc M+H+ | ppm      | Prob     | TotalIntensity | SpR | IonProportion | Redundancy | globalFLR | localFLR |
|--------------------------------------------------------------------------------------|---------------------------------------------------------------|--------------|----------|----------|-------|-----------|----------|----------|----------------|-----|---------------|------------|-----------|----------|
| [POA4D0 30S ribosomal protein S6 OS=Escherichia coli O6 GN=rrsF ]                    | R.HYEVFMVHPD(282.2056)QSEQVPGMIERY                            | 4            | 3.67925  | 0.46065  | 100   | 2923.459  | -2.27    | 7.736944 | 971238.3       | 1   | 30.8          | 2          | 2.99E-11  | 1.95E-11 |
| [POA6F6 60 kDa chaperonin OS=Escherichia coli O6 GN=grtL ]                           | R.QVLNCGEPPSVVANTVKGGD(282.2056)GNVGYNAATEEYGNMIDMGLDPTKVTR.S | 4            | 6.1333   | 0.527    | 100   | 5542.693  | 2.4      | 6.990459 | 2.79E+07       | 1   | 22.9          | 2          | 2.32E-06  | 7.89E-05 |
|                                                                                      | K.ANDAAGD(282.2056)GTTTATVLAQAIIEGLK.A                        | 3            | 3.6972   | 0.33672  | 100   | 2684.447  | -4.2     | 6.555434 | 4321054        | 1   | 41.1          | 1          | 1.91E-05  | 0.002746 |
|                                                                                      | K.ATLED(282.2056)LGQAQR                                       | 2            | 2.3862   | 0.3082   | 100   | 1327.758  | 2.05     | 5.275362 | 990745.6       | 1   | 66.7          | 1          | 8.31E-10  | 3.65E-10 |
|                                                                                      | K.GGD(282.2056)GNVGYNAATEEYGNMIDMGLDPTK.V                     | 3            | 3.474067 | 0.496967 | 100   | 3248.488  | -4.46667 | 7.869935 | 2290685        | 1   | 33.3          | 1          | 0.005934  | 0.005883 |
| [POA6M9 Elongation factor G OS=Escherichia coli O6 GN=fusA ]                         | K.IGEVHD(282.2056)GAATMDWMEQEQR.G                             | 3            | 3.21565  | 0.34395  | 100   | 2614.202  | 2.2      | 7.654236 | 828667         | 1   | 39.7          | 1          | 1.08E-09  | 4.80E-10 |
|                                                                                      | R.VYSGVVNSGD(282.2056)TVLNSVKA                                | 2            | 3.08035  | 0.323867 | 100   | 2020.107  | -3.75167 | 9.856055 | 470954.7       | 1   | 48.3          | 1          | 4.88E-05  | 1.90E-03 |
| [POA6N2 Elongation factor Tu OS=Escherichia coli O6 GN=tufA ]                        | K.ALEGD(282.2056)AEWEAK.I                                     | 2            | 2.950333 | 0.3413   | 100   | 1500.769  | 1.2      | 7.734511 | 8804118        | 1   | 84.2          | 3          | 7.98E-06  | 2.43E-04 |
|                                                                                      | K.CD(282.2056)MVDDEELLEVEVEVR.E                               | 3            | 4.621333 | 0.550533 | 100   | 2506.187  | 4        | 6.172545 | 682017.7       | 1   | 32.2          | 1          | 0.007787  | 0.041945 |
|                                                                                      | R.GITINTSHVEYD(282.2056)TPTR.H                                | 3            | 4.174867 | 0.5751   | 100   | 2086.093  | -0.4     | 7.424041 | 1905338        | 1   | 28.3          | 1          | 2.81E-10  | 1.20E-10 |
|                                                                                      | R.HYAHVD(282.2056)CPGHADYVK.N                                 | 3            | 3.614663 | 0.370588 | 99.9  | 2050.992  | 4.241667 | 7.242086 | 3.54E+07       | 1   | 48.6          | 6          | 8.86E-06  | 3.88E-04 |
|                                                                                      | R.TTDVTGTLPEGVEMVMPGD(282.2056)NIIK.M                         | 3            | 4.47854  | 0.4519   | 100   | 2828.442  | -3.98    | 5.422923 | 5292609        | 1   | 36.6          | 1          | 1.02E-04  | 1.97E-03 |
|                                                                                      | K.ILELAGFLD(282.2056)SIIPEPER.A                               | 2            | 3.4161   | 0.369467 | 100   | 2244.228  | 0.833333 | 6.629926 | 3185363        | 1   | 65.5          | 2          | 7.03E-10  | 3.13E-10 |
|                                                                                      | R.AIDKPFLLPIED(282.2056)IVFSISGR.G                            | 3            | 3.41445  | 0.37765  | 100   | 2399.37   | 2.775    | 5.85866  | 1.66E+07       | 1   | 50            | 1          | 8.40E-10  | 3.74E-10 |
| [POA6P2 Elongation factor Ts OS=Escherichia coli O6 GN=tsf ]                         | R.VAAEGD(282.2056)VLGSYQHGAR.I                                | 3            | 2.73305  | 0.31745  | 99.4  | 2025.088  | 2.05     | 5.498847 | 2701511        | 1   | 44.9          | 1          | 5.50E-10  | 2.48E-10 |
| [POA6Q0 Enolase OS=Escherichia coli O6 GN=eno ]                                      | K.AAGYELGKDTLAM(282.2056)CAASEFYK.D                           | 3            | 5.5646   | 0.376375 | 99.7  | 2806.379  | -1.7     | 8.321842 | 1.57E+07       | 1   | 60.7          | 2          | 4.64E-10  | 1.79E-10 |
|                                                                                      | K.D(282.2056)QAGIDKIMIDLDTENK.S                               | 3            | 3.1615   | 0.431867 | 100   | 2258.17   | -4.76667 | 8.13407  | 3419412        | 2   | 43.9          | 1          | 0.002519  | 0.004123 |
| [POA6R1 3-oxoacyl-[acyl-carrier-protein] synthase 3 OS=Escherichia coli O6 GN=fabH ] | R.HGNTSAASVPCALD(282.2056)EAVRDGR.I                           | 3            | 3.560975 | 0.56875  | 100   | 2465.231  | 4.725    | 8.879271 | 5888089        | 1   | 41.7          | 1          | 0.006535  | 0.004363 |
| [POA6Y9 Chaperone protein dnaK OS=Escherichia coli O6 GN=dnaK ]                      | K.AKIELSSAQTD(282.2056)VNLPIYITADATGPK.H                      | 3            | 3.30865  | 0.3723   | 100   | 3013.62   | -4.6     | 6.549933 | 1086749        | 1   | 29.5          | 2          | 1.53E-05  | 7.42E-04 |
|                                                                                      | K.HSQVPTAEDI(282.2056)NQSAVTIHVLOGER.K                        | 4            | 4.0662   | 0.458625 | 100   | 2935.502  | -4.3875  | 7.801736 | 2971210        | 1   | 37.6          | 2          | 2.11E-09  | 7.27E-10 |
|                                                                                      | K.TAEDVLPPEVTEAVITVPAYFND(282.2056)JAQR.Q                     | 3            | 3.93696  | 0.4947   | 100   | 3151.595  | -3.06    | 7.7471   | 5419710        | 1   | 41.9          | 1          | 8.10E-05  | 1.75E-03 |
| [POA718 Ribose-phosphate pyrophosphokinase OS=Escherichia coli O6 GN=pps ]           | R.ANVSQVMHIGDVAGRDCVLVDDMID(282.2056)TGGTLCK.A                | 4            | 6.3795   | 0.513643 | 100   | 3841.907  | 3.742857 | 7.172724 | 4.25E+07       | 1   | 34.7          | 3          | 1.32E-10  | 4.07E-11 |
| [POA7A0 Phosphoglycerate kinase OS=Escherichia coli O6 GN=pgk ]                      | K.FAD(282.2056)VACAGPLLAELDALGK.A                             | 3            | 4.028738 | 0.460413 | 100   | 2284.237  | 4.3375   | 6.907443 | 2889038        | 1   | 38.5          | 1          | 2.20E-08  | 1.14E-06 |
|                                                                                      | K.IAD(282.2056)QLIVGGGIANFIAAQGHVGVK.S                        | 3            | 4.38462  | 0.47388  | 100   | 2747.52   | -2.89    | 10.3797  | 3904082        | 1   | 50.6          | 1          | 6.61E-03  | 1.41E-03 |
| [POA7E6 CTP synthase OS=Escherichia coli O6 GN=pyrG ]                                | R.SGDD(282.2056)QLEIIVEIPNHPWFVACQFHPFEFTSPR.D                | 4            | 4.66885  | 0.51245  | 100   | 4034.986  | -1.15    | 6.024978 | 2.03E+07       | 1   | 30.4          | 1          | 1.07E-04  | 3.39E-03 |
| [POA7J4 50S ribosomal protein L10 OS=Escherichia coli O6 GN=rplJ ]                   | R.AVEGTFPECLKD(282.2056)AFVGPGLIAYSMEHPGAAAR.L                | 3            | 6.15025  | 0.51823  | 100   | 3687.866  | 1.025    | 6.631363 | 1411936        | 1   | 17.8          | 1          | 1.40E-10  | 6.11E-11 |
| [POA7V1 30S ribosomal protein S2 OS=Escherichia coli O6 GN=rrsB ]                    | K.DAALSCD(282.2056)QFFVNRH.W                                  | 3            | 2.939533 | 0.406933 | 99.6  | 1961.965  | -2.1     | 6.698929 | 7438513        | 1   | 56.8          | 3          | 1.84E-03  | 2.94E-02 |

| Protein Descriptions                                                                        | sequence                                                      | Charge State | XCorr    | DeltaCN  | Conflk | Calc M+H+ | ppm      | Prob     | TotalIntensity | Spr | IonProportion | Redundancy | globalFLR | localFLR |
|---------------------------------------------------------------------------------------------|---------------------------------------------------------------|--------------|----------|----------|--------|-----------|----------|----------|----------------|-----|---------------|------------|-----------|----------|
| [POA7V9 30S ribosomal protein S4 OS=Escherichia coli O6 GN=rrpsD ]                          | R.VVNIASVQVSPND(282.2056)VVSR.E                               | 3            | 3.3272   | 0.4166   | 100    | 2242.255  | -2.24167 | 6.922903 | 2450059        | 1   | 50.9          | 1          | 1.04E-06  | 5.80E-05 |
| [POA826 Serine hydroxymethyltransferase OS=Escherichia coli O6 GN=nglyA ]                   | K.ELAGWMC(282.2056)VLDSINDEAVIER.I                            | 3            | 5.29888  | 0.50782  | 100    | 2717.327  | -0.255   | 7.433316 | 1.72E+07       | 1   | 50            | 1          | 0.001256  | 0.001109 |
| [POA837 Succinyl-CoA ligase [ADP-forming] subunit beta OS=Escherichia coli O6 GN=sucC ]     | R.LVYQTD(282.2056)JANGQPVNQILVEAADI.AK.E                      | 3            | 4.038    | 0.4673   | 99.8   | 3054.647  | -1.63333 | 7.218959 | 5725411        | 1   | 34.2          | 2          | 2.27E-08  | 1.29E-06 |
| [POA8G7 Flavoprotein wrbA OS=Escherichia coli O6 GN=wrbA ]                                  | R.GGTPYVATTIAGGD(282.2056)GSRQPSQEELSIAR.Y                    | 3            | 3.29535  | 0.4015   | 100    | 3058.555  | -3.35    | 5.988062 | 975994.8       | 1   | 22.2          | 1          | 1.09E-09  | 4.81E-10 |
| [POA8V3 DNA-directed RNA polymerase subunit beta OS=Escherichia coli O6 GN=rrpoB ]          | R.LSLGDLDTLMPQD(282.2056)MINAKPISA.VK.E                       | 3            | 5        | 0.492433 | 100    | 2923.6    | -1.99167 | 7.246008 | 9968577        | 1   | 27.8          | 1          | 4.37E-03  | 3.90E-03 |
| [POA956 KHG/KDPG aldolase OS=Escherichia coli O6 GN=redA ]                                  | K.AATEGTIPLPGISTVSELM(LGMD)(282.2056)YGLKEKFFPAEANGGVK.A      | 4            | 5.7366   | 0.52555  | 100    | 4681.466  | -4.66667 | 6.526991 | 5031395        | 1   | 32.8          | 1          | 8.85E-11  | 8.85E-11 |
| [POA999 Ferritin-1 OS=Escherichia coli O6 GN=ftnA ]                                         | R.INTVESPFAYSSLD(282.2056)ELFQETVKHEQLTQK.I                   | 4            | 5.007    | 0.459033 | 100    | 3970.012  | -1.68333 | 7.154652 | 1.49E+07       | 1   | 33            | 3          | 5.65E-11  | 2.39E-11 |
|                                                                                             | R.LFD(282.2056)YLTDTGNLPR.I                                   | 3            | 2.47002  | 0.4318   | 100    | 1806.975  | 0.54     | 6.848366 | 1708776        | 1   | 39.5          | 1          | 1.11E-10  | 7.13E-11 |
| [POA9B3 Glyceraldehyde-3-phosphate dehydrogenase A OS=Escherichia coli O6 GN=gapA ]         | K.VIND(282.2056)NFGIIEGLMTTVHATTATQK.T                        | 3            | 5.7368   | 0.386113 | 100    | 2856.529  | -4.125   | 7.260034 | 9381950        | 1   | 50.7          | 2          | 2.49E-09  | 7.68E-10 |
| [POA9G7 Isocitrate lyase OS=Escherichia coli O6 GN=aceA ]                                   | R.TDADAADLTS(282.2056)CDPYDSEFTGER.T                          | 3            | 4.289625 | 0.513813 | 100    | 3059.379  | 2.3375   | 10.05186 | 2.71E+07       | 2   | 45.8          | 1          | 1.31E-10  | 3.96E-11 |
| [POA9L0 FKBP-type peptidyl-prolyl cis-trans isomerase slyD OS=Escherichia coli O6 GN=slyD ] | R.FLAETD(282.2056)JQGPVPEITAEVDDHVVDGNHMLGQNKL.F              | 4            | 3.2496   | 0.3567   | 99.8   | 4140.107  | -2.65833 | 5.93886  | 1178425        | 1   | 12.6          | 1          | 1.18E-10  | 8.10E-11 |
| [POA956 Glycerol dehydrogenase OS=Escherichia coli O6 GN=glgDA ]                            | K.ALAHFMGVPAIAPTIASD(282.2056)APCSALSVYDGEFDR.Y               | 3            | 3.575557 | 0.357571 | 100    | 4275.147  | -1.44286 | 6.566715 | 1646127        | 1   | 29.8          | 1          | 9.92E-10  | 4.33E-10 |
| [POAA17 Transcriptional regulatory protein ompR OS=Escherichia coli O6 GN=ompR ]            | R.ESFHLMVLD(282.2056)LMJLPGEDGLSCR.R                          | 3            | 4.632738 | 0.31695  | 100    | 2814.435  | 2.075    | 8.332836 | 2493783        | 1   | 47.7          | 1          | 1.11E-09  | 4.83E-10 |
| [POAA26 Thioredoxin-1 OS=Escherichia coli O6 GN=trxA ]                                      | K.LNDI(282.2056)QNPSTAPK.Y                                    | 2            | 2.504225 | 0.38055  | 100    | 1549.87   | 5.908752 | 766150.1 | 1              | 50  | 1             | 9.11E-10   | 4.05E-10  | 9.11E-10 |
| [POAAI6 3-oxoacyl-[acyl-carrier-protein] synthase 2 OS=Escherichia coli O6 GN=fabF ]        | K.SMTGHLLGAGAVESYSLALRDQVPPPTINLNDPDEGCD(282.2056)LDVFPHEAR.Q | 5            | 5.68332  | 0.52692  | 100    | 5627.826  | 2.48     | 8.794396 | 1.64E+07       | 1   | 36.9          | 2          | 1.33E-10  | 4.06E-11 |
| [POAAJ0 Malonyl CoA-acyl carrier protein transacylase OS=Escherichia coli O6 GN=fabD ]      | K.ITFNAPTVPVNNVD(282.2056)VKCETNGDAIRDALVR.Q                  | 4            | 4.2335   | 0.405833 | 99.6   | 3679.959  | 3.233333 | 6.955297 | 2.87E+07       | 2   | 33.9          | 1          | 0.000762  | 0.001653 |
| [POAB81 ATP synthase subunit alpha OS=Escherichia coli O6 GN=atpA ]                         | R.HIGLAD(282.2056)CMQGEMISLPGNR.Y                             | 3            | 4.06826  | 0.44816  | 99.8   | 2381.189  | -0.505   | 6.457961 | 1443956        | 1   | 42            | 1          | 4.04E-10  | 2.02E-10 |
| [POAB85 ATP synthase subunit beta OS=Escherichia coli O6 GN=atpD ]                          | R.AAPSYEELNSQELLETKIKVID(282.2056)LMCPFAK.G                   | 4            | 6.707    | 0.549675 | 99.7   | 3635.87   | 3.6      | 7.216695 | 5.72E+07       | 1   | 32.7          | 5          | 4.64E-06  | 1.91E-04 |
| [POAB88 Citrate synthase OS=Escherichia coli O6 GN=glcA ]                                   | R.D(282.2056)SHPMAVMCGITGALAAFYHDSLDVNNPR.H                   | 4            | 7.981388 | 0.6695   | 100    | 3441.65   | -1.8625  | 11.94151 | 3.40E+07       | 1   | 37.7          | 4          | 5.12E-10  | 2.48E-10 |
|                                                                                             | R.ETCHEVLKELGTDD(282.2056)LLVAMELENIALNDPFIK.K                | 5            | 4.668967 | 0.518867 | 99.8   | 4501.288  | 2.933333 | 6.973507 | 1.87E+07       | 2   | 31            | 1          | 1.33E-10  | 4.11E-11 |
|                                                                                             | R.GFPIDQLATD(282.2056)SNYLEVCYLLNGEKPTEQYDFKTTVTR.H           | 4            | 7.406    | 0.54855  | 100    | 4978.482  | 3.125    | 9.410625 | 2.21E+07       | 2   | 31.7          | 9          | 1.90E-03  | 1.94E-03 |
|                                                                                             | K.ITFDGD(282.2056)EGILLHR.G                                   | 3            | 3.117067 | 0.327767 | 100    | 1881.059  | 2.866667 | 7.416337 | 2250791        | 1   | 45.5          | 1          | 6.29E-04  | 0.004688 |
| [POAC42 Succinate dehydrogenase flavoprotein subunit OS=Escherichia coli O6 GN=sdhA ]       | R.AGVPVQD(282.2056)MEMWQFHPTGIAGAGVLVTEGCR.G                  | 3            | 4.309533 | 0.502667 | 99.8   | 3495.733  | -1.01667 | 7.6584   | 1.44E+07       | 1   | 33.1          | 2          | 1.38E-04  | 3.86E-03 |
|                                                                                             | K.GSDYIGD(282.2056)QDAIEMCK.T                                 | 2            | 2.5696   | 0.4905   | 100    | 2146.978  | -4.7     | 9.019269 | 833211.8       | 1   | 50            | 1          | 0.001312  | 0.007776 |
| [POACD5 NiFU-like protein OS=Escherichia coli O6 GN=nifU ]                                  | K.SLDEAQAIKNTDIAELEPPVKHCSI.AED(282.2056)AIK.A                | 3            | 5.581967 | 0.41205  | 99.9   | 4156.221  | -3.18333 | 6.412707 | 1.45E+07       | 1   | 40.6          | 1          | 6.13E-04  | 1.23E-03 |
| [POACF1 DNA-binding protein HU-alpha OS=Escherichia coli O6 GN=hupA ]                       | K.AALESTLAAITSLKEGD(282.2056)AVQLVGFSTFK.V                    | 3            | 5.6069   | 0.463    | 100    | 3248.778  | -4.95    | 5.470314 | 5703632        | 2   | 30.7          | 1          | 1.88E-09  | 7.64E-10 |
| [POACF9 DNA-binding protein H-NS OS=Escherichia coli O6 GN=hns ]                            | R.EMLIADGID(282.2056)PNELLNSLAAVK.S                           | 2            | 3.24635  | 0.465875 | 100    | 2508.374  | -3.67083 | 7.928573 | 4607238        | 1   | 40.6          | 1          | 1.12E-10  | 7.21E-11 |
| [POADY4 50S ribosomal protein L14 OS=Escherichia coli O6 GN=rrlN ]                          | R.YAGVGD(282.2056)IIKITIKAI.PR.G                              | 3            | 4.007533 | 0.4364   | 100    | 2239.354  | -3.525   | 9.016177 | 1621799        | 1   | 40.6          | 2          | 4.38E-10  | 2.06E-10 |
| [POAE09 Alkyl hydroperoxide reductase subunit C OS=Escherichia coli O6 GN=ahpC ]            | R.ATFVVD(282.2056)PQGIQIAEIVTAEGIGR.D                         | 2            | 3.407975 | 0.518075 | 100    | 2666.488  | -3.7925  | 9.759778 | 956110.7       | 1   | 31.3          | 2          | 3.94E-11  | 2.57E-11 |

| Protein Descriptions                                                                               | sequence                                               | Charge State | XCorr    | DeltaCN  | ConF% | Calc M+H+ | ppm      | Prob     | TotalIntensity | Spr | IonProportion | Redundancy | globalFLR | localFLR |
|----------------------------------------------------------------------------------------------------|--------------------------------------------------------|--------------|----------|----------|-------|-----------|----------|----------|----------------|-----|---------------|------------|-----------|----------|
|                                                                                                    | R.NFDNMRED(282.2056)EGLADR.A                           | 3            | 2.319125 | 0.3452   | 99.8  | 1963.929  | 0.175    | 6.586012 | 3687123        | 1   | 35.4          | 1          | 1.06E-10  | 6.99E-11 |
|                                                                                                    | R.WSVFFYPAD(282.2056)FTFVCPTELDGVDADHYEELQ.L           | 4            | 4.87235  | 0.433725 | 99.7  | 4039.925  | 2.55     | 7.689168 | 6581791        | 1   | 29.2          | 2          | 5.30E-05  | 1.66E-03 |
| [POAEP4 UTP-glucose-1-phosphate uridylyltransferase OS=Escherichia coli O6 GN=galU ]               | K.GLGHAVLCAHPVVD(282.2056)EPVAIVPDLVDEYSDLSQDNLAEMIR.R | 4            | 6.015757 | 0.513986 | 100   | 5051.585  | 1.457143 | 6.652686 | 673079.3       | 1   | 9.7           | 1          | 3.86E-03  | 2.96E-03 |
| [POAEU1 Histidine-binding periplasmic protein OS=Escherichia coli O6 GN=hisJ ]                     | K.GIEVSYQGQD(282.2056)NIYSDLTAGR.I                     | 3            | 2.9582   | 0.4322   | 100   | 2581.326  | -4.625   | 6.797157 | 4106664        | 1   | 39.3          | 1          | 5.30E-05  | 0.002047 |
| [POAEU8 Chaperone protein skp OS=Escherichia coli O6 GN=skp ]                                      | K.D(282.2056)ITADV.LQ                                  | 2            | 2.2374   | 0.324867 | 100   | 1156.694  | 0.9      | 6.444761 | 3211289        | 1   | 85.7          | 1          | 9.29E-11  | 6.07E-11 |
| [POAFF7 Transcription elongation protein nusA OS=Escherichia coli O6 GN=nusA ]                     | R.GVCTLED(282.2056)IAEQGIDDLADIEGLTDEKAGALIMAAAR.N     | 5            | 7.3384   | 0.5854   | 99.7  | 3955.999  | 3.622222 | 8.079259 | 2222568        | 1   | 21.8          | 1          | 6.37E-05  | 2.00E-03 |
| [POAFG4 2-oxoglutarate dehydrogenase E1 component OS=Escherichia coli O6 GN=sucA ]                 | R.STFQQLPGTGVKPD(282.2056)QFHSQTR.E                    | 4            | 2.9251   | 0.3077   | 99.9  | 2641.385  | -1.2     | 6.095705 | 4818985        | 1   | 36.2          | 1          | 6.64E-10  | 2.63E-10 |
| [POAFH9 Osmotically-inducible protein Y OS=Escherichia coli O6 GN=osmY ]                           | K.GYAGD(282.2056)IATTSK.EA                             | 2            | 2.24955  | 0.36305  | 100   | 1595.828  | 1.85     | 7.314196 | 642619.8       | 1   | 66.7          | 1          | 9.84E-10  | 4.44E-10 |
|                                                                                                    | K.VETTDGVVQLSGTV(282.2056)SQAQSDRAESIAK.A              | 3            | 2.914933 | 0.4465   | 100   | 3173.628  | -4.5     | 7.402868 | 226161.9       | 2   | 20.6          | 1          | 1.01E-07  | 1.87E-05 |
| [POAFL4 Peptidyl-prolyl cis-trans isomerase A OS=Escherichia coli O6 GN=ppiA ]                     | K.APVSVQNFVD(282.2056)YVNSGFYNTTFHR.V                  | 3            | 3.74945  | 0.38695  | 100   | 3058.517  | -0.575   | 6.424553 | 2359510        | 1   | 49.3          | 1          | 6.09E-10  | 2.72E-10 |
| [POAG08 Ribulose-phosphate 3-epimerase OS=Escherichia coli O6 GN=rpe ]                             | K.VNNIGEIAAAGAD(282.2056)M(15.9949)FVAGSAIFDQPDYK.K    | 3            | 3.1897   | 0.4542   | 100   | 3182.583  | -3       | 6.794992 | 3451644        | 1   | 33.7          | 1          | 8.70E-10  | 3.77E-10 |
| [POAG31 Transcription termination factor Rho OS=Escherichia coli O6 GN=rho ]                       | K.TMLLQNIQSIAYNP(282.2056)CVLMVLLIDERPEVTEMQR.L        | 5            | 5.0264   | 0.51065  | 100   | 4652.371  | 3.625    | 8.331747 | 1.40E+07       | 1   | 33.6          | 2          | 1.02E-04  | 1.99E-03 |
| [POAG56 50S ribosomal protein L6 OS=Escherichia coli O6 GN=rplF ]                                  | K.GNVINLSLGFSPV(282.2056)JHQAPGITAECTPQTEVLK.G         | 4            | 6.562867 | 0.330733 | 99.7  | 4038.148  | 0.9      | 5.357041 | 1.79E+07       | 1   | 36.5          | 1          | 5.32E-10  | 2.72E-10 |
| [POAG68 30S ribosomal protein S1 OS=Escherichia coli O6 GN=rpsA ]                                  | K.AYED(282.2056)AETVTVGWK.V                            | 2            | 2.1989   | 0.4094   | 99.6  | 1848.97   | 2.15     | 7.788189 | 726610.8       | 1   | 55            | 1          | 9.35E-10  | 4.22E-10 |
|                                                                                                    | R.AVIESENSAERD(282.2056)QLLENLQEGMEVK.G                | 3            | 4.279333 | 0.447467 | 100   | 3113.578  | -4.7     | 8.664146 | 1570020        | 1   | 33.7          | 2          | 7.42E-10  | 3.31E-10 |
| [POAGD4 Superoxide dismutase [Fe] OS=Escherichia coli O6 GN=sodB ]                                 | K.VAEAIAASFGFAD(282.2056)FK.A                          | 3            | 4.335625 | 0.525475 | 100   | 1913.017  | -0.875   | 9.161053 | 2134886        | 1   | 46            | 2          | 1.11E-11  | 7.27E-12 |
| [P60758 ATP phosphoribosyltransferase OS=Escherichia coli O6 GN=hisG ]                             | R.AGLADAICD(282.2056)LVSTGATLEANGLREVEVYR.S            | 4            | 4.0067   | 0.503483 | 99.2  | 3458.831  | 3.966667 | 7.204071 | 9157154        | 4   | 32.3          | 2          | 1.30E-10  | 3.95E-11 |
| [P60907 Histidyl-tRNA synthetase OS=Escherichia coli O6 GN=hisS ]                                  | R.VLDSKNPEVQALLNDAPALGDYLD(282.2056)EESREHFAGLCK.L     | 5            | 4.17415  | 0.440467 | 99.4  | 4296.161  | 4.533333 | 6.84934  | 3.62E+07       | 1   | 32.7          | 1          | 1.33E-10  | 4.09E-11 |
| [P61890 Malate dehydrogenase OS=Escherichia coli O6 GN=mdh ]                                       | K.GKQPGVEVPIVGHSGVTILPLSQVPGVVFTEQEVAD(282.2056)LTR.I  | 4            | 3.92275  | 0.27495  | 100   | 4750.614  | -1.3     | 5.632754 | 2184913        | 1   | 25            | 1          | 7.56E-10  | 3.41E-10 |
|                                                                                                    | R.ALQGEQGVVECAVEGD(282.2056)GQYAR.F                    | 3            | 3.88982  | 0.5087   | 100   | 2681.299  | -4.84    | 7.410256 | 1162259        | 1   | 36.2          | 1          | 5.00E-08  | 1.51E-06 |
| [P62400 50S ribosomal protein L5 OS=Escherichia coli O6 GN=rplE ]                                  | K.LLD(282.2056)NAAADLAISGQPLTK.A                       | 3            | 3.96532  | 0.38668  | 100   | 2405.413  | -4.56    | 7.332753 | 2983623        | 1   | 52.5          | 1          | 0.006299  | 0.002033 |
| [P62708 2,3-bisphosphoglycerate-dependent phosphoglycerate mutase OS=Escherichia coli O6 GN=pgmA ] | K.YLD(282.2056)NMSEEELELNIPTGVPLVYFDEFKPLKR.Y          | 4            | 4.189867 | 0.3218   | 100   | 4337.241  | -3.13333 | 6.024743 | 1613360        | 1   | 20.8          | 2          | 9.79E-10  | 4.29E-10 |
|                                                                                                    | R.AIHTLWNVLD(282.2056)ELDQALVPEK.S                     | 3            | 4.0967   | 0.310467 | 100   | 2772.508  | -3.8     | 5.433195 | 3726383        | 1   | 45.8          | 1          | 1.01E-07  | 1.87E-05 |
| [P63226 Phosphoheptose isomerase OS=Escherichia coli O6 GN=gmhA ]                                  | R.NELNEAETLANFLKD(282.2056)DANIHAQR.A                  | 4            | 4.4025   | 0.4971   | 100   | 3092.612  | -0.475   | 7.727639 | 2268951        | 1   | 29.3          | 1          | 0.004114  | 0.005093 |
| [P68766 Cytosol aminopeptidase OS=Escherichia coli O6 GN=pepA ]                                    | K.GLTFDSGIGISIKPSEGMD(282.2056)EMK.Y                   | 2            | 3.5527   | 0.2932   | 100   | 2481.204  | -0.675   | 7.613343 | 5762888        | 1   | 68.6          | 2          | 1.31E-06  | 7.38E-05 |
| [P69777 Major outer membrane lipoprotein OS=Escherichia coli O6 GN=lpp ]                           | K.IDQLSSD(282.2056)VQTLNAK.V                           | 2            | 2.647967 | 0.432267 | 100   | 1814.002  | -3.71667 | 7.747963 | 422734.3       | 1   | 40            | 1          | 9.09E-11  | 5.94E-11 |
| [P69784 Glucose-specific phosphotransferase enzyme IIA component OS=Escherichia coli O6 GN=crr ]   | K.VGDTVIEFD(282.2056)LPLEEK.A                          | 2            | 3.3482   | 0.504938 | 100   | 2099.163  | -1.325   | 9.107833 | 3072686        | 1   | 55.2          | 1          | 7.83E-11  | 5.12E-11 |
|                                                                                                    | K.DTGTIEIAPLSGEIVNEDVDP(282.2056)VFPAEK.I              | 3            | 3.0544   | 0.5425   | 100   | 3365.809  | -1.9     | 8.284775 | 559221.6       | 1   | 21.8          | 3          | 3.80E-10  | 1.49E-10 |

| Protein Descriptions                                                                      | sequence                                           | Charge State | XCorr    | DeltaCN  | Conf% | Calc M+H+ | ppm      | Prob     | TotalIntensity | Spr | IonProportion | Redundancy | globalFLR | localFLR |
|-------------------------------------------------------------------------------------------|----------------------------------------------------|--------------|----------|----------|-------|-----------|----------|----------|----------------|-----|---------------|------------|-----------|----------|
| [Q8CVB3 ABC transporter Periplasmic binding protein ytfQ OS=Escherichia coli O6 GN=ytfQ ] | R.SFVAQGV(282.2056)AIFAPVATGWPEVLK.E               | 3            | 3.45915  | 0.39995  | 100   | 2896.634  | -4.45    | 6.137115 | 2442318        | 1   | 41.1          | 1          | 7.26E-10  | 3.23E-10 |
| [Q8CVJ7 D-ribose-binding periplasmic protein OS=Escherichia coli O6 GN=rbsB ]             | K.ELANVQD(282.2056)LTVR.G                          | 2            | 2.882467 | 0.378067 | 99.5  | 1539.885  | -4.39    | 7.285852 | 2542348        | 1   | 72.2          | 1          | 4.99E-11  | 3.26E-11 |
|                                                                                           | K.MANQANIPVITLD(282.2056)R.Q                       | 2            | 4.36659  | 0.49057  | 100   | 1838.032  | -3.16    | 7.851164 | 611425.5       | 1   | 52.4          | 1          | 5.83E-05  | 1.12E-03 |
|                                                                                           | K.D(282.2056)GAQKEADKLGYNLVLDQSNPAK.E              | 4            | 3.19175  | 0.3705   | 99.3  | 2969.569  | -3.475   | 5.378007 | 2080427        | 1   | 29.8          | 1          | 0.009019  | 0.007221 |
|                                                                                           | K.GLVNMQNLLTAHPD(282.2056)IVQAVFAQNDEMALGAL.R.A    | 4            | 4.695629 | 0.512529 | 100   | 3618.888  | -3.05714 | 7.681211 | 1.24E+07       | 1   | 28            | 1          | 1.12E-09  | 4.84E-10 |
|                                                                                           | K.ILLINPTD(282.2056)SDAVGNVAK.M                    | 2            | 2.757775 | 0.334325 | 100   | 2022.159  | 4.325    | 6.061663 | 5260906        | 1   | 48.3          | 1          | 0.00763   | 0.002931 |
|                                                                                           | K.SD(282.2056)VMVVFQDTPDGEKAVNDGK.L                | 3            | 4.1393   | 0.4297   | 100   | 2519.245  | 1.7      | 7.462507 | 2002832        | 1   | 46.8          | 1          | 9.56E-10  | 4.31E-10 |
|                                                                                           |                                                    |              |          |          |       |           |          |          |                |     |               |            |           |          |
| [Q8CVS8 Glycine betaine-binding periplasmic protein OS=Escherichia coli O6 GN=proX ]      | K.LFAIMQLPVADINAQNAIMHD(282.2056)GKA               | 3            | 4.1691   | 0.4701   | 100   | 2792.495  | -1.25    | 7.879578 | 3242287        | 1   | 28.9          | 1          | 1.36E-05  | 6.31E-04 |
| [Q8CVZ5 Protein yebF OS=Escherichia coli O6 GN=yebF ]                                     | K.IVGGAD(282.2056)PVAVVSLQDIQGDKDKWSVPLVR.G        | 4            |          |          | 100   | 3602.969  | 2.1      | 6.816507 | 3347588        | 1   | 33.1          | 1          | 8.96E-10  | 3.84E-10 |
| [Q8CW07 Putative uncharacterized protein ynhG OS=Escherichia coli O6 GN=ynhG ]            | R.YVEVHRPLSAEEQNVQTMPTLPAGFTQK(282.2056)NKA        | 5            | 3.83755  | 0.3405   | 100   | 4248.155  | -0.95    | 5.559866 | 2287705        | 1   | 30.3          | 1          | 3.44E-09  | 1.36E-09 |
| [Q8CW44 Periplasmic oligopeptide-binding protein OS=Escherichia coli O6 GN=oppA ]         | K.WSDGTPVTAQD(282.2056)FVYSWQR.S                   | 3            | 5.62112  | 0.59114  | 99.6  | 2425.194  | -1.80286 | 6.932344 | 450633.2       | 1   | 15.8          | 1          | 5.32E-10  | 2.55E-10 |
|                                                                                           | K.AEQQLD(282.2056)KDSAIVPYYVYVNR.L                 | 3            | 3.873971 | 0.386414 | 100   | 2724.436  | -4.8     | 6.582139 | 1332939        | 1   | 40.3          | 1          | 0.002728  | 0.007778 |
| [Q8CW76 Outer membrane protein A OS=Escherichia coli O6 GN=ompA ]                         | K.ATLKPEGQAALD(282.2056)QLYLSLNDPK.D               | 3            | 3.68682  | 0.39846  | 100   | 2882.562  | -3.94    | 7.445889 | 4747262        | 1   | 41.8          | 1          | 1.37E-03  | 2.99E-03 |
|                                                                                           | R.GMGESNPVTGNCTD(282.2056)NVK.Q                    | 2            | 2.7132   | 0.30345  | 99.9  | 2061.969  | -1.175   | 6.168942 | 294063.8       | 1   | 34.6          | 1          | 1.06E-09  | 4.76E-10 |
| [Q8CW78 Outer membrane protein F OS=Escherichia coli O6 GN=ompF ]                         | K.YADVGSFD(282.2056)YGR.N                          | 2            | 2.6079   | 0.5093   | 100   | 1531.754  | 3.4      | 10.40942 | 1864555        | 1   | 60            | 1          | 1.18E-10  | 3.59E-11 |
| [Q8CWD1 Protease do OS=Escherichia coli O6 GN=htrA ]                                      | R.SGLNAENYENFIQTD(282.2056)AANR.G                  | 2            | 5.2299   | 0.6349   | 100   | 2522.263  | -4.73333 | 12.25428 | 1002421        | 1   | 66.7          | 1          | 3.30E-11  | 1.01E-11 |
| [Q8CXW0 Transcriptional Regulatory protein basR/pmrA OS=Escherichia coli O6 GN=basR ]     | R.MAEQSLAEGHYSVLVD(282.2056)JLGPDEDGLHFLR.I        | 4            | 4.3955   | 0.2993   | 100   | 3677.9    | 3.9      | 7.617318 | 5197688        | 1   | 35.5          | 1          | 8.18E-10  | 3.69E-10 |
| [Q8FAE5 Mg(2+) transport ATPase, P-type 1 OS=Escherichia coli O6 GN=mgfA ]                | K.VCHEVGLD(282.2056)AGEVVIIGSDIETLSDELANLAQR.T     | 4            | 6.997056 | 0.395533 | 99.8  | 3706.859  | 4.877778 | 7.417605 | 2.05E+07       | 1   | 35.7          | 2          | 3.43E-03  | 2.67E-03 |
| [Q8FAU3 Alpha-galactosidase OS=Escherichia coli O6 GN=meIA ]                              | R.NDGLIDNPOGCCVEACLVD(282.2056)ANGIQPTK.V          | 3            | 4.24408  | 0.36262  | 100   | 3452.697  | -1.16    | 7.278889 | 6314490        | 1   | 34.1          | 3          | 1.17E-10  | 8.00E-11 |
|                                                                                           | R.TIPHLWQICED(282.2056)MTEVCPDAMLNVPNMAMNTWAMYAR.Y | 4            | 5.15355  | 0.552867 | 100   | 4856.23   | 1.466667 | 6.126363 | 646954.9       | 1   | 11.6          | 1          | 1.33E-10  | 4.09E-11 |
| [Q8FAV0 PhnB protein OS=Escherichia coli O6 GN=phnB ]                                     | K.SAQD(282.2056)SAENCPGSMQFPDTAIAHANVR.I           | 3            | 4.51475  | 0.49745  | 99.9  | 3056.431  | 3.15     | 9.05452  | 3508989        | 1   | 38.9          | 2          | 2.33E-04  | 4.72E-03 |
| [Q8FB83 DNA-directed RNA polymerase subunit beta' OS=Escherichia coli O6 GN=rpoC ]        | K.AMMNDLQTTVINRD(282.2056)GQEEK.Q                  | 3            | 3.615475 | 0.510175 | 99.6  | 2604.276  | -0.325   | 7.112984 | 1.59E+07       | 1   | 47.5          | 1          | 4.36E-10  | 2.09E-10 |
|                                                                                           | K.IVDAQGND(282.2056)VLIPGTDMPAQYFLPGK.A            | 3            | 3.69355  | 0.24555  | 99.8  | 2941.549  | -4.3     | 5.116859 | 4394298        | 1   | 43.1          | 1          | 0.009944  | 0.002602 |
| [Q8FB49 Catalase-peroxidase OS=Escherichia coli O6 GN=katG ]                              | R.FAPLNSWPD(282.2056)NVSLDKA                       | 2            | 2.720475 | 0.36325  | 100   | 1985.049  | 2.675    | 8.067015 | 2413244        | 1   | 64.3          | 1          | 1.06E-09  | 4.55E-10 |
| [Q8FBC3 Glycerol kinase OS=Escherichia coli O6 GN=glpK ]                                  | K.YIVALD(282.2056)QGTSSR.A                         | 2            | 2.9998   | 0.4019   | 100   | 1692.928  | -1.275   | 9.604556 | 1006605        | 1   | 61.9          | 1          | 4.40E-04  | 0.001219 |
| [Q8BV2 Tryptophanase OS=Escherichia coli O6 GN=tnaA ]                                     | K.MVAFSNYFD(282.2056)JTQGH5QINGCTVR.N              | 3            | 4.26642  | 0.4187   | 100   | 3062.461  | -0.99    | 8.47233  | 1311568        | 1   | 31            | 3          | 2.19E-03  | 2.89E-02 |
|                                                                                           | R.IAQVQYLV(282.2056)GLEEIGVVCCQAGGHAFFVDAK.L       | 4            | 3.8859   | 0.2809   | 99.8  | 3624.884  | -2.4     | 5.378563 | 3197558        | 1   | 35.9          | 1          | 1.09E-09  | 4.81E-10 |



| Protein Descriptions                                                                                                            | sequence                                                     | Charge State | XCorr    | DeltCN   | Confl% | Calc M+H+ | ppm      | Prob     | TotalIntensity | Spr | IonProportion | Redundancy | globalFLR | localFLR |
|---------------------------------------------------------------------------------------------------------------------------------|--------------------------------------------------------------|--------------|----------|----------|--------|-----------|----------|----------|----------------|-----|---------------|------------|-----------|----------|
| [Q8FCA1 2-amino-3-ketobutyrate coenzyme A ligase OS=Escherichia coli O6 GN=ktbl ]                                               | R.YANNID(282.2056)MQLEEAR.L                                  | 2            | 2.6464   | 0.3583   | 99.9   | 1735.843  | -4.68333 | 5.891358 | 1484420        | 1   | 18.4          | 1          | 1.36E-05  | 6.31E-04 |
| [Q8FCA6 2,3-bisphosphoglycerate-independent phosphoglycerate mutase OS=Escherichia coli O6 GN=ggml ]                            | K.TPVMDALWANRPHTLIDASGLVGLPD(282.2056)RQMGNSVGHVNLGAGR.I     | 5            | 5.682638 | 0.48555  | 99.8   | 4933.531  | -0.0375  | 7.44647  | 3.26E+07       | 1   | 39.8          | 2          | 1.68E-08  | 8.58E-07 |
| Protein Descriptions                                                                                                            | sequence                                                     | Charge State | XCorr    | DeltCN   | Confl% | Calc M+H+ | ppm      | Prob     | TotalIntensity | Spr | IonProportion | Redundancy | globalFLR | localFLR |
| [Q8FD87 Polyribonucleotide nucleotidyltransferase OS=Escherichia coli O6 GN=pmp ]                                               | R.VGYIND(282.2056)QVVLNPTQDELKESKL                           | 3            | 2.8745   | 0.3473   | 99.8   | 2735.425  | -3.4     | 5.825948 | 1251774        | 1   | 42.4          | 1          | 1.08E-09  | 4.80E-10 |
| [Q8FE38 Transketolase 1 OS=Escherichia coli O6 GN=htkA ]                                                                        | K.YGVERQD(282.2056)GPTALILSR.Q                               | 3            | 5.786975 | 0.483025 | 99.8   | 2057.15   | -1.875   | 6.492442 | 3850584        | 1   | 31.7          | 2          | 3.22E-10  | 1.57E-10 |
| [Q8FE53 Fructose-bisphosphate aldolase class II OS=Escherichia coli O6 GN=iba ]                                                 | K.ENNFALPAVNCVGT(282.2056)SINAVLETAAK.V                      | 3            | 3.775229 | 0.442629 | 99.6   | 3000.546  | -1.61071 | 7.531749 | 2764233        | 1   | 29.5          | 4          | 3.06E-10  | 1.68E-10 |
| [Q8FE67 Glycine dehydrogenase [decarboxylating] OS=Escherichia coli O6 GN=gcvP ]                                                | R.HIGPD(282.2056)AAQQQEMLNVAAGQSLNLTGQVVK.D                  | 3            | 5.176067 | 0.579967 | 100    | 3481.858  | -4.8     | 10.67853 | 2192994        | 1   | 44.8          | 1          | 7.53E-10  | 3.35E-10 |
| [Q8FF47 Peptidase B OS=Escherichia coli O6 GN=pepB ]                                                                            | K.ATYSINNDGITLHNGAD(282.2056)DLGUQR.A                        | 3            | 4.28125  | 0.49045  | 100    | 2966.569  | -4.4     | 9.339482 | 2719971        | 1   | 39.7          | 1          | 0.001012  | 0.008692 |
| [Q8FF53 Nucleoside diphosphate kinase OS=Escherichia coli O6 GN=ndk ]                                                           | R.ADYADSLTENGTHGSD(282.2056)SVESAAR.E                        | 3            | 3.151833 | 0.518567 | 100    | 2635.223  | -0.13333 | 7.769305 | 793592.5       | 1   | 32.9          | 2          | 1.03E-09  | 4.63E-10 |
| [Q8FF88 Cysteine synthase A OS=Escherichia coli O6 GN=cysK ]                                                                    | K.GKTDLSVAVEPTD(282.2056)SPVIAQALAGEIKPGPK.I                 | 5            | 4.25485  | 0.3488   | 99.6   | 3650.016  | -1.7     | 5.335237 | 6940755        | 1   | 32.8          | 1          | 9.59E-10  | 4.26E-10 |
| [Q8FF19 Phosphate acetyltransferase OS=Escherichia coli O6 GN=pta ]                                                             | R.TGGDAPD(282.2056)QITTVR.A                                  | 2            | 2.6056   | 0.282    | 100    | 1713.913  | -1.125   | 6.258899 | 983413.5       | 1   | 71.4          | 1          | 0.001174  | 0.00569  |
| [Q8FF19 NADH-quinone oxidoreductase subunit G OS=Escherichia coli O6 GN=nuoG ]                                                  | R.IAPYYHLFGSD(282.2056)ELSQR.A                               | 3            | 2.5053   | 0.3855   | 99.7   | 2178.134  | -4.975   | 5.690764 | 2414814        | 1   | 39.6          | 1          | 5.04E-10  | 1.97E-10 |
|                                                                                                                                 | R.RGDDITLNAEQAMQGAAD(282.2056)ILR.Q                          | 3            | 4.08415  | 0.3534   | 100    | 2687.393  | -4.45    | 6.043969 | 3717534        | 1   | 44.6          | 1          | 3.64E-08  | 4.29E-06 |
| [Q8FFX8 Methionyl-tRNA synthetase OS=Escherichia coli O6 GN=metG ]                                                              | K.AQQLGITPEQMIGEMSQEHQTD(282.2056)FAGFINSDYVHSTHSEENR.Q      | 5            | 3.0945   | 0.3595   | 99.4   | 5122.333  | -3.8     | 5.700945 | 1766296        | 1   | 15.9          | 1          | 2.84E-09  | 3.70E-07 |
| [Q8FFY8 D-tagatose-1,6-bisphosphate aldolase subunit gatZ OS=Escherichia coli O6 GN=gatZ ]                                      | R.ERIIIGDHLGPNWCQENAD(282.2056)AAAMEK.S                      | 3            | 3.62525  | 0.52015  | 100    | 3234.578  | 3.3      | 7.646817 | 4719584        | 1   | 30.7          | 1          | 3.32E-04  | 9.02E-03 |
|                                                                                                                                 | R.IIIGGD(282.2056)HLGPNWCQENADAAMEK.S                        | 3            | 4.6503   | 0.383813 | 99.7   | 2949.435  | 2.825    | 6.593102 | 1.90E+07       | 1   | 48.6          | 3          | 1.20E-10  | 6.39E-11 |
| [Q8FG44 6-phosphogluconate dehydrogenase, decarboxylating OS=Escherichia coli O6 GN=ugd ]                                       | K.IAAVAED(282.2056)GEPCTVYIGADGAGHYVK.M                      | 3            | 4.04575  | 0.507875 | 99.8   | 2845.419  | 3.625    | 8.237231 | 6376046        | 2   | 35.6          | 2          | 1.02E-04  | 1.99E-03 |
| [Q8FH20 6-phosphofructokinase isozyme 2 OS=Escherichia coli O6 GN=pfkB ]                                                        | R.CVD(282.2056)SSGEALSAAIAGNIELVKPNQK.E                      | 3            | 5.574733 | 0.596367 | 100    | 3079.682  | 3.766667 | 9.053409 | 1.09E+07       | 1   | 39.7          | 1          | 4.11E-10  | 2.24E-10 |
| [Q8FH55 Phage shock protein A OS=Escherichia coli O6 GN=psspA ]                                                                 | K.SLDD(282.2056)QFAELKADDAISEQLAQLK.A                        | 3            | 4.0881   | 0.327333 | 100    | 2830.483  | -3.46667 | 5.995772 | 3819777        | 1   | 58.7          | 1          | 1.50E-04  | 0.001821 |
| [Q8FHX2 Aldehyde-alcohol dehydrogenase OS=Escherichia coli O6 GN=adhE ]                                                         | K.LVAMGIGHTSCLYTD(282.2056)QDNQPAR.V                         | 3            | 4.943375 | 0.521625 | 100    | 2786.371  | -0.65    | 8.825508 | 1.95E+07       | 1   | 41.4          | 3          | 0.005678  | 0.004265 |
|                                                                                                                                 | K.SLCAFGGLD(282.2056)AVTHAMEYVSLAFESDQALQALK.L               | 4            | 5.0106   | 0.528038 | 99.7   | 4039.03   | 2.275    | 8.15414  | 1552235        | 1   | 14            | 3          | 0.000638  | 0.007105 |
| [Q8FY8 Aminopeptidase N OS=Escherichia coli O6 GN=pepN ]                                                                        | K.GGHPVNSVLNVQAEQTFVFD(282.2056)NVYFQVPVALLCEFSAPVKLEYK.W    | 4            | 5.7337   | 0.4293   | 100    | 5234.702  | -0.43333 | 6.72245  | 1.20E+07       | 1   | 30.2          | 1          | 3.78E-10  | 2.06E-10 |
| [Q8FJM0 DNA protection during starvation protein OS=Escherichia coli O6 GN=dps ]                                                | R.TALIDL(282.2056)TMAER.A                                    | 2            | 5.5297   | 0.453425 | 100    | 1767.942  | -0.96    | 7.157894 | 1.57E+07       | 1   | 37.5          | 2          | 1.91E-10  | 9.65E-11 |
| [Q8FJT8 Dihydrolopaamide succinyltransferase component of 2-oxoglutarate dehydrogenase complex OS=Escherichia coli O6 GN=sucB ] | R.QQASLEEQNND(282.2056)ALSPAIRR.L                            | 3            | 3.3541   | 0.4164   | 100    | 2422.28   | -1.05    | 6.314877 | 2095966        | 1   | 43.1          | 1          | 1.20E-10  | 3.65E-11 |
| [Q8FKM7 Xanthine phosphoribosyltransferase OS=Escherichia coli O6 GN=xpt ]                                                      | R.HVD(282.2056)TVCISSYHDHNR.E                                | 3            | 2.828833 | 0.509067 | 100    | 2228.051  | 4.033333 | 9.495481 | 1714041        | 1   | 53.5          | 1          | 0.002092  | 0.001527 |
| [Q8FL41 Aconitate hydratase 2 OS=Escherichia coli O6 GN=acnB ]                                                                  | R.MLLPDTVGTGGD(282.2056)SHTRFPIGIFPAGSLVAFAAATGVMLDMPESVLR.F | 4            | 3.479    | 0.3104   | 100    | 5337.784  | -1.7     | 5.712161 | 1980895        | 1   | 15.5          | 1          | 0.001989  | 0.001699 |
| [Q8FL43 Pyruvate dehydrogenase E1 component OS=Escherichia coli O6 GN=aceE ]                                                    | K.LIQLMNETVGGD(282.2056)YQTFK.S                              | 2            | 7.711014 | 0.534243 | 100    | 2297.185  | -1.825   | 8.58541  | 5.94E+07       | 1   | 24            | 2          | 2.19E-04  | 6.29E-03 |
| [Q8FLD1 Transaldolase B OS=Escherichia coli O6 GN=talB ]                                                                        | K.LYQPD(282.2056)ATTNPSLILNAAQPEYR.K                         | 3            | 3.581475 | 0.358738 | 100    | 2998.6    | -4.975   | 6.31171  | 4566406        | 1   | 42.9          | 1          | 3.23E-09  | 9.96E-10 |

|                                   |   |        |     |     |          |          |          |         |   |      |   |          |          |
|-----------------------------------|---|--------|-----|-----|----------|----------|----------|---------|---|------|---|----------|----------|
| R.ITESEFLWQHNGD(282.2056)PMAVDKLL | 3 | 3.8113 | 0.3 | 100 | 2570.271 | -4.73333 | 5.470058 | 2261317 | 1 | 40.4 | 1 | 4.64E-05 | 2.03E-03 |
|                                   |   |        |     |     |          |          |          |         |   |      |   |          |          |

**Supplementary Table S2 – TMT ratio without DBHA**

| Uniprot ID | Symbol | TMT ratio<br>(high/low) | Protein description                                                                               |
|------------|--------|-------------------------|---------------------------------------------------------------------------------------------------|
| P17446     | betI   | 0.3035108               | HTH-type transcriptional regulator OS=Escherichia coli O6 GN=betI                                 |
| P0AAD6     | sdaC   | 0.3231478               | Serine transporter OS=Escherichia coli O6 GN=sdaC                                                 |
| P28629     | adiA   | 0.3376048               | Biodegradative arginine decarboxylase OS=Escherichia coli O6 GN=adiA                              |
| W8ZQQ8     | prfA   | 0.3504218               | Peptide chain release factor 1 OS=Escherichia coli O6 GN=prfA                                     |
| P0A8H6     | yihI   | 0.3598991               | Der GTPase-activating protein YihI OS=Escherichia coli O6 GN=yihI                                 |
| P0AGK4     | yhbY   | 0.3902801               | RNA-binding protein YhbY OS=Escherichia coli O6 GN=yhbY                                           |
| P76372     | wzzB   | 0.395638                | Chain length determinant protein OS=Escherichia coli O6 GN=wzzB                                   |
| A0A0H2V5L9 | c0952  | 0.4007883               | Major capsid protein OS=Escherichia coli O6 GN=c0952                                              |
| P08014     | sdhB   | 0.4044381               | Succinate dehydrogenase iron-sulfur protein OS=Escherichia coli O6 GN=sdhB                        |
| P0A9G6     | aceA   | 0.4337789               | Isocitrate lyase OS=Escherichia coli O6 GN=aceA                                                   |
| P43672     | uup    | 0.4789615               | ABC transporter ATP-binding protein uup OS=Escherichia coli O6 GN=uup                             |
| P02925     | rbsB   | 0.4798012               | D-ribose-binding periplasmic protein OS=Escherichia coli O6 GN=rbsB                               |
| A0A0H2VAK2 | c2392  | 0.4896955               | Putative P4-family integrase OS=Escherichia coli O6 GN=c2392                                      |
| P69801     | manY   | 0.5011332               | Mannose permease IIC component OS=Escherichia coli O6 GN=manY                                     |
| P0A7D7     | purC   | 0.5087966               | Phosphoribosylaminoimidazole-succinocarboxamide synthase OS=Escherichia coli O6 GN=purC           |
| P77454     | glsA1  | 0.5136018               | Glutaminase 1 OS=Escherichia coli O6 GN=glsA1                                                     |
| P77747     | ompN   | 0.520146                | Outer membrane protein N OS=Escherichia coli O6 GN=ompN                                           |
| A0A0H2VGI6 | c5432  | 0.5225545               | Uncharacterized protein OS=Escherichia coli O6 GN=c5432                                           |
| P77757     | arnC   | 0.5251272               | Undecaprenyl-phosphate 4-deoxy-4-formamido-L-arabinose transferase OS=Escherichia coli O6 GN=arnC |
| P0ADE2     | ytfK   | 0.5388041               | Uncharacterized protein ytfK OS=Escherichia coli O6 GN=ytfK                                       |
| P69786     | ptsG   | 0.5401173               | PTS system glucose-specific EIICB component OS=Escherichia coli O6 GN=ptsG                        |
| P0AAG8     | mglA   | 0.5526579               | Galactose/methyl galactoside import ATP-binding protein MglA OS=Escherichia coli O6 GN=mglA       |
| A0A0H2VE33 | c4605  | 0.55382                 | Putative uncharacterized protein OS=Escherichia coli O6 GN=c4605                                  |
| P69428     | tatA   | 0.5601959               | Sec-independent protein translocase protein tatA OS=Escherichia coli O6 GN=tatA                   |
| A0A0H2VB35 | c3819  | 0.5644768               | Putative conserved protein OS=Escherichia coli O6 GN=c3819                                        |
| Q8FCW0     | c4155  | 0.5688288               | Phosphoglycolate phosphatase OS=Escherichia coli O6 GN=c4155                                      |
| P21151     | fadA   | 0.5765341               | 3-ketoacyl-CoA thiolase OS=Escherichia coli O6 GN=fadA                                            |

| Uniprot ID | Symbol | TMT ratio (high/low) | Protein description                                                                  |
|------------|--------|----------------------|--------------------------------------------------------------------------------------|
| P77348     | mppA   | 0.5863075            | Periplasmic murein peptide-binding protein OS=Escherichia coli O6 GN=mppA            |
| AOA0H2VEB5 | c4764  | 0.5921488            | Carbamate kinase-like protein yahl OS=Escherichia coli O6 GN=c4764                   |
| P15639     | putH   | 0.598546             | Bifunctional purine biosynthesis protein purH OS=Escherichia coli O6 GN=purH         |
| P76145     | tam    | 0.607817             | Trans-aconitate 2-methyltransferase OS=Escherichia coli O6 GN=tam                    |
| Q8FDI4     | asst   | 0.6180655            | Arylsulfate sulfotransferase OS=Escherichia coli O6 GN=asst                          |
| P0A8G3     | uxaC   | 0.6196519            | Uronate isomerase OS=Escherichia coli O6 GN=uxaC                                     |
| P0AC30     | ftsX   | 0.6208459            | Cell division protein OS=Escherichia coli O6 GN=ftsX                                 |
| Q93K97     | nudF   | 0.6232125            | ADP-ribose pyrophosphatase OS=Escherichia coli O6 GN=nudF                            |
| P77399     | fadJ   | 0.6309645            | Fatty acid oxidation complex subunit alpha OS=Escherichia coli O6 GN=fadJ            |
| P37685     | aldB   | 0.6332423            | Aldehyde dehydrogenase B OS=Escherichia coli O6 GN=aldB                              |
| P0A6E6     | atpC   | 0.6404413            | ATP synthase epsilon chain OS=Escherichia coli O6 GN=atpC                            |
| P0A759     | nagB   | 0.6473125            | Glucosamine-6-phosphate deaminase OS=Escherichia coli O6 GN=nagB                     |
| P0AE78     | corC   | 0.6484594            | Magnesium and cobalt efflux protein CorC OS=Escherichia coli O6 GN=corC              |
| P0AES0     | gsp    | 0.6505682            | Glutathionylspermidine synthase OS=Escherichia coli O6 GN=gsp                        |
| P0ACU5     | fabR   | 0.6515249            | HTH-type transcriptional repressor fabR OS=Escherichia coli O6 GN=fabR               |
| P69805     | manZ   | 0.6529139            | Mannose permease IID component OS=Escherichia coli O6 GN=manZ                        |
| P40120     | mdoD   | 0.6590376            | Glucans biosynthesis protein D OS=Escherichia coli O6 GN=mdoD                        |
| P61887     | rffH   | 0.6607092            | Glucose-1-phosphate thymidyltransferase OS=Escherichia coli O6 GN=rffH               |
| P15254     | purL   | 0.6619524            | Phosphoribosylformylglycinamide synthase OS=Escherichia coli O6 GN=purL              |
| P0A8Z3     | ybgC   | 0.6646533            | Acyl-CoA thioester hydrolase YbgC OS=Escherichia coli O6 GN=ybgC                     |
| P02931     | ompF   | 0.668287             | Outer membrane protein F OS=Escherichia coli O6 GN=ompF                              |
| P00490     | malP   | 0.6726271            | Maltodextrin phosphorylase OS=Escherichia coli O6 GN=malP                            |
| P0AG27     | yibN   | 0.6743906            | Uncharacterized protein yibN OS=Escherichia coli O6 GN=yibN                          |
| W9AHZ8     | yfbT   | 0.6758105            | Protein yfbT OS=Escherichia coli O6 GN=yfbT                                          |
| P76045     | ompG   | 0.6775701            | Outer membrane protein G OS=Escherichia coli O6 GN=ompG                              |
| P0ACK2     | agaR   | 0.680078             | Putative aga operon transcriptional repressor OS=Escherichia coli O6 GN=agaR         |
| P0AC19     | folX   | 0.6805175            | D-erythro-7,8-dihydroneopterin triphosphate epimerase OS=Escherichia coli O6 GN=folX |
| P23830     | pssA   | 0.6825318            | CDP-diacylglycerol--serine O-phosphatidyltransferase OS=Escherichia coli O6 GN=pssA  |
| P0A8F0     | upp    | 0.6849994            | Uracil phosphoribosyltransferase OS=Escherichia coli O6 GN=upp                       |

| Uniprot ID | Symbol | TMT ratio (high/low) | Protein description                                                                 |
|------------|--------|----------------------|-------------------------------------------------------------------------------------|
| P77376     | ydgJ   | 0.6888543            | Hypothetical oxidoreductase ydgJ OS=Escherichia coli O6 GN=ydgJ                     |
| P68187     | malK   | 0.6894906            | Maltose/maltodextrin import ATP-binding protein MalK OS=Escherichia coli O6 GN=malK |
| P75914     | ycdX   | 0.6955932            | Putative hydrolase ycdX OS=Escherichia coli O6 GN=ycdX                              |
| P75864     | rlmI   | 0.6970101            | Ribosomal RNA large subunit methyltransferase K/L OS=Escherichia coli O6 GN=rlmI    |
| P04993     | recD   | 0.6985757            | Exodeoxyribonuclease V alpha chain OS=Escherichia coli O6 GN=recD                   |
| P0A853     | tnaA   | 0.7013516            | Tryptophanase OS=Escherichia coli O6 GN=tnaA                                        |
| P0ABV6     | tolR   | 0.7044193            | Protein tolR OS=Escherichia coli O6 GN=tolR                                         |
| P0AGE9     | sucD   | 0.7056318            | Succinyl-CoA ligase [ADP-forming] subunit alpha OS=Escherichia coli O6 GN=sucD      |
| P08997     | aceB   | 0.7073828            | Malate synthase A OS=Escherichia coli O6 GN=aceB                                    |
| P0A6Y8     | dnaK   | 0.7074224            | Chaperone protein dnaK OS=Escherichia coli O6 GN=dnaK                               |
| P39377     | iadA   | 0.7075718            | Isoaspartyl dipeptidase OS=Escherichia coli O6 GN=iadA                              |
| P16681     | phnB   | 0.7083605            | PhnB protein OS=Escherichia coli O6 GN=phnB                                         |
| P00803     | lepB   | 0.7103782            | Signal peptidase I OS=Escherichia coli O6 GN=lepB                                   |
| P60785     | lepA   | 0.7108197            | Elongation factor 4 OS=Escherichia coli O6 GN=lepA                                  |
| F8LVU1     | rpIL   | 0.7135127            | 50S ribosomal protein L7/L12 OS=Escherichia coli O6 GN=rpIL                         |
| P04982     | rbsD   | 0.7154137            | D-ribose pyranase OS=Escherichia coli O6 GN=rbsD                                    |
| Q54GJ2     | purD   | 0.7173813            | Phosphoribosylamine--glycine ligase OS=Escherichia coli O6 GN=purD                  |
| P0AFZ3     | sspB   | 0.7195922            | Stringent starvation protein B OS=Escherichia coli O6 GN=sspB                       |
| P0AG93     | secF   | 0.7212695            | Protein-export membrane protein secF OS=Escherichia coli O6 GN=secF                 |
| P0ADT5     | ygiC   | 0.7236345            | Uncharacterized protein ygiC OS=Escherichia coli O6 GN=ygiC                         |
| P37330     | glcB   | 0.7283577            | Malate synthase G OS=Escherichia coli O6 GN=glcB                                    |
| P0AB61     | yciN   | 0.7309509            | Protein yciN OS=Escherichia coli O6 GN=yciN                                         |
| A0A0H2V9S6 | c2461  | 0.7318841            | Uncharacterized protein OS=Escherichia coli O6 GN=c2461                             |
| P0ACW6     | ydch   | 0.737812             | Putative uncharacterized protein ydch OS=Escherichia coli O6 GN=ydch                |
| P00946     | manA   | 0.7386313            | Mannose-6-phosphate isomerase OS=Escherichia coli O6 GN=manA                        |
| W9ALX3     | yibP   | 0.7386596            | Putative uncharacterized protein yibP OS=Escherichia coli O6 GN=yibP                |
| P41407     | azoR   | 0.7387319            | FMN-dependent NADH-azoreductase OS=Escherichia coli O6 GN=azoR                      |
| A0A0H2V625 | c1249  | 0.7390671            | Uncharacterized protein OS=Escherichia coli O6 GN=c1249                             |
| P05042     | fumC   | 0.7405291            | Fumarate hydratase class II OS=Escherichia coli O6 GN=fumC                          |

| Uniprot ID | Symbol | TMT ratio (high/low) | Protein description                                                                 |
|------------|--------|----------------------|-------------------------------------------------------------------------------------|
| P12008     | aroC   | 0.7413628            | Chorismate synthase OS=Escherichia coli O6 GN=aroC                                  |
| AOA0H2V8R4 | c2514  | 0.741502             | Uncharacterized protein OS=Escherichia coli O6 GN=c2514                             |
| P22256     | gabT   | 0.7417741            | 4-aminobutyrate aminotransferase OS=Escherichia coli O6 GN=gabT                     |
| P0A9J6     | rbsK   | 0.742538             | Ribokinase OS=Escherichia coli O6 GN=rbsK                                           |
| W8ZSQ1     | ytfR   | 0.7432493            | Putative ATP-binding component of a transport system OS=Escherichia coli O6 GN=ytfR |
| P0AAB8     | uspD   | 0.7434233            | Universal stress protein D OS=Escherichia coli O6 GN=uspD                           |
| P0ADC1     | lptE   | 0.7435898            | LPS-assembly lipoprotein lptE OS=Escherichia coli O6 GN=lptE                        |
| P0A6Y5     | hslO   | 0.7462018            | 33 kDa chaperonin OS=Escherichia coli O6 GN=hslO                                    |
| W9AEC6     | ycgK   | 0.7475444            | Protein ycgK OS=Escherichia coli O6 GN=ycgK                                         |
| P0A8N5     | lysU   | 0.7488918            | Lysyl-tRNA synthetase, heat inducible OS=Escherichia coli O6 GN=lysU                |
| P0ABS5     | dnaG   | 0.7499411            | DNA primase OS=Escherichia coli O6 GN=dnaG                                          |
| P0A6F5     | groL   | 0.7523511            | 60 kDa chaperonin OS=Escherichia coli O6 GN=groL                                    |
| P27306     | sthA   | 0.7547843            | Soluble pyridine nucleotide transhydrogenase OS=Escherichia coli O6 GN=sthA         |
| P0ABH9     | clpA   | 0.7549316            | ATP-dependent Clp protease ATP-binding subunit ClpA OS=Escherichia coli O6 GN=clpA  |
| P76346     | mtfA   | 0.7549486            | Protein mtfA OS=Escherichia coli O6 GN=mtfA                                         |
| P0A7B8     | hslV   | 0.7553135            | ATP-dependent protease subunit HslV OS=Escherichia coli O6 GN=hslV                  |
| P27550     | acs    | 0.7568972            | Acetyl-coenzyme A synthetase OS=Escherichia coli O6 GN=acs                          |
| P0A836     | sucC   | 0.7615993            | Succinate--CoA ligase [ADP-forming] subunit beta OS=Escherichia coli O6 GN=sucC     |
| P0A790     | panD   | 0.7650979            | Aspartate 1-decarboxylase OS=Escherichia coli O6 GN=panD                            |
| Q8FDS2     | c3666  | 0.7652051            | UPF0401 protein c3666 OS=Escherichia coli O6 GN=c3666                               |
| P0AFY8     | seqA   | 0.7654819            | Protein seqA OS=Escherichia coli O6 GN=seqA                                         |
| P671714    | ribH   | 0.7656628            | 6,7-dimethyl-8-ribityllumazine synthase OS=Escherichia coli O6 GN=ribH              |
| P0AEG6     | dsbC   | 0.7669683            | Thiol:disulfide interchange protein dsbC OS=Escherichia coli O6 GN=dsbC             |
| P0A870     | talB   | 0.7719801            | Transaldolase B OS=Escherichia coli O6 GN=talB                                      |
| P0A8W2     | slyA   | 0.7728412            | Transcriptional regulator slyA OS=Escherichia coli O6 GN=slyA                       |
| P37692     | rfaF   | 0.7749071            | ADP-heptose--LPS heptosyltransferase II OS=Escherichia coli O6 GN=rfaF              |
| P0AC38     | aspA   | 0.7772054            | Aspartate ammonia-lyase OS=Escherichia coli O6 GN=aspA                              |
| P37636     | mdtE   | 0.7846701            | Multidrug resistance protein mdtE OS=Escherichia coli O6 GN=mdtE                    |
| P37637     | mdtF   | 0.7849003            | Multidrug resistance protein MdtF OS=Escherichia coli O6 GN=mdtF                    |

| Uniprot ID | Symbol | TMT ratio (high/low) | Protein description                                                                    |
|------------|--------|----------------------|----------------------------------------------------------------------------------------|
| P06710     | dnaZ   | 0.7916178            | DNA polymerase III subunit tau OS=Escherichia coli O6 GN=dnaZ                          |
| P07623     | metA   | 0.7927514            | Homoserine O-succinyltransferase OS=Escherichia coli O6 GN=metA                        |
| P68206     | yjbJ   | 0.7928615            | UPF0337 protein yjbJ OS=Escherichia coli O6 GN=yjbJ                                    |
| P0AG40     | ribF   | 0.7929873            | Riboflavin biosynthesis protein ribF OS=Escherichia coli O6 GN=ribF                    |
| P25748     | galS   | 0.7953068            | Mgl repressor and galactose ultrainduction factor OS=Escherichia coli O6 GN=galS       |
| P0AEL6     | fepB   | 0.7954509            | Ferrienterobactin-binding periplasmic protein OS=Escherichia coli O6 GN=fepB           |
| P0AFI2     | parC   | 0.79637              | Topoisomerase IV subunit A OS=Escherichia coli O6 GN=parC                              |
| P0AF12     | mtnN   | 0.7973573            | methylthioadenosine/S-adenosylhomocysteine nucleosidase OS=Escherichia coli O6 GN=mtnN |
| P0ADG4     | suhB   | 0.7975179            | Inositol-1-monophosphatase OS=Escherichia coli O6 GN=suhB                              |
| P76187     | ydhF   | 0.7999398            | Hypothetical oxidoreductase ydhF OS=Escherichia coli O6 GN=ydhF                        |
| P0AFC3     | nuoA   | 0.8001767            | NADH-quinone oxidoreductase subunit A OS=Escherichia coli O6 GN=nuoA                   |
| A0A0H2VGG0 | c5375  | 0.8004717            | Putative uncharacterized protein OS=Escherichia coli O6 GN=c5375                       |
| P23872     | aes    | 0.8009381            | Acetyl esterase OS=Escherichia coli O6 GN=aes                                          |
| P0A8N3     | lysS   | 0.8015215            | Lysyl-tRNA synthetase OS=Escherichia coli O6 GN=lysS                                   |
| W8ZIS6     | yebH   | 0.8020247            | Ribosomal RNA large subunit methyltransferase A OS=Escherichia coli O6 GN=yebH         |
| P0AD83     | pyrI   | 0.8025645            | Aspartate carbamoyltransferase regulatory chain OS=Escherichia coli O6 GN=pyrI         |
| P31437     | yicI   | 0.8042744            | Uncharacterized inner membrane transporter OS=Escherichia coli O6 GN=yicI              |
| P75942     | flgJ   | 0.8050922            | Peptidoglycan hydrolase flgJ OS=Escherichia coli O6 GN=flgJ                            |
| P17117     | mdaA   | 0.8054687            | Oxygen-insensitive NADPH nitroreductase OS=Escherichia coli O6 GN=mdaA                 |
| P0AGH8     | pstC   | 0.8103661            | Phosphate transport system permease protein pstC OS=Escherichia coli O6 GN=pstC        |
| P0AFG3     | sucA   | 0.8109479            | 2-oxoglutarate dehydrogenase E1 component OS=Escherichia coli O6 GN=sucA               |
| P27431     | ycfD   | 0.8111712            | Putative uncharacterized protein ycfD OS=Escherichia coli O6 GN=ycfD                   |
| A0A0H2VDS3 | c5349  | 0.813702             | Carbamate kinase OS=Escherichia coli O6 GN=c5349                                       |
| P28248     | dcd    | 0.8151751            | Deoxycytidine triphosphate deaminase OS=Escherichia coli O6 GN=dcd                     |
| P21170     | speA   | 0.815756             | Biosynthetic arginine decarboxylase OS=Escherichia coli O6 GN=speA                     |
| P04951     | kdsB   | 0.81582              | 3-deoxy-manno-octulosonate cytidyltransferase OS=Escherichia coli O6 GN=kdsB           |
| P0ABQ4     | folA   | 0.8160549            | Dihydrofolate reductase OS=Escherichia coli O6 GN=folA                                 |
| P0A6P5     | der    | 0.8192091            | GTPase Der OS=Escherichia coli O6 GN=der                                               |
| A0A0H2V9M3 | c2399  | 0.8197371            | Uncharacterized protein OS=Escherichia coli O6 GN=c2399                                |

| Uniprot ID | Symbol | TMT ratio (high/low) | Protein description                                                                                                   |
|------------|--------|----------------------|-----------------------------------------------------------------------------------------------------------------------|
| P0AB65     | yccX   | 0.820717             | Acylphosphatase OS=Escherichia coli O6 GN=yccX                                                                        |
| P0AFG6     | sucB   | 0.8213714            | Dihydrolipoamide succinyltransferase component of 2-oxoglutarate dehydrogenase complex OS=Escherichia coli O6 GN=sucB |
| A0A0H2V7A8 | c1765  | 0.8219571            | Partial Putative outer membrane channel protein OS=Escherichia coli O6 GN=c1765                                       |
| P36553     | hemF   | 0.8220539            | Coproporphyrinogen-III oxidase, aerobic OS=Escherichia coli O6 GN=hemF                                                |
| P0A6Z3     | htpG   | 0.8224283            | Chaperone protein htpG OS=Escherichia coli O6 GN=htpG                                                                 |
| P0ACR4     | yeiE   | 0.8242372            | Uncharacterized HTH-type transcriptional regulator yeiE OS=Escherichia coli O6 GN=yeiE                                |
| P0A7DA     | purA   | 0.8273174            | Adenylosuccinate synthetase OS=Escherichia coli O6 GN=purA                                                            |
| Q46927     | ygdL   | 0.8276668            | Putative uncharacterized protein ygdL OS=Escherichia coli O6 GN=ygdL                                                  |
| P0ABK2     | cydB   | 0.8280925            | Cytochrome d ubiquinol oxidase subunit 2 OS=Escherichia coli O6 GN=cydB                                               |
| P27833     | wecE   | 0.8290551            | Lipopolysaccharide biosynthesis protein rffA OS=Escherichia coli O6 GN=wecE                                           |
| P21179     | katE   | 0.8290757            | Catalase HP11 OS=Escherichia coli O6 GN=katE                                                                          |
| P0ABQ2     | garR   | 0.8295932            | 2-hydroxy-3-oxopropionate reductase OS=Escherichia coli O6 GN=garR                                                    |
| P0AE12     | amn    | 0.8305317            | AMP nucleosidase OS=Escherichia coli O6 GN=amn                                                                        |
| P37440     | ucpA   | 0.8310599            | Oxidoreductase ucpA OS=Escherichia coli O6 GN=ucpA                                                                    |
| P0AG00     | wzzE   | 0.8349676            | Lipopolysaccharide biosynthesis protein wzzE OS=Escherichia coli O6 GN=wzzE                                           |
| P0ACP7     | purR   | 0.8351157            | HTH-type transcriptional repressor purR OS=Escherichia coli O6 GN=purR                                                |
| A0A0H2VF72 | c5312  | 0.8365224            | Putative conserved protein OS=Escherichia coli O6 GN=c5312                                                            |
| P77150     | pdxY   | 0.8368369            | Pyridoxamine kinase OS=Escherichia coli O6 GN=pdxY                                                                    |
| A0A0H2V5Y8 | c1138  | 0.8370507            | Putative uncharacterized protein OS=Escherichia coli O6 GN=c1138                                                      |
| P02924     | araF   | 0.8374721            | L-arabinose-binding periplasmic protein OS=Escherichia coli O6 GN=araF                                                |
| P21165     | pepQ   | 0.8378954            | Xaa-Pro dipeptidase OS=Escherichia coli O6 GN=pepQ                                                                    |
| P0AFM6     | pspA   | 0.8385626            | Phage shock protein A OS=Escherichia coli O6 GN=pspA                                                                  |
| P39199     | yfcB   | 0.8387841            | Hypothetical adenine-specific methylase yfcB OS=Escherichia coli O6 GN=yfcB                                           |
| P0AF20     | nagC   | 0.839116             | N-acetylglucosamine repressor OS=Escherichia coli O6 GN=nagC                                                          |
| P0AA25     | trxA   | 0.8407472            | Thioredoxin-1 OS=Escherichia coli O6 GN=trxA                                                                          |
| P0ABF1     | pcnB   | 0.8415398            | Poly(A) polymerase OS=Escherichia coli O6 GN=pcnB                                                                     |
| P0A784     | orn    | 0.843318             | Oligoribonuclease OS=Escherichia coli O6 GN=orn                                                                       |
| P08390     | usg    | 0.8433327            | USG-1 protein OS=Escherichia coli O6 GN=usg                                                                           |



| Uniprot ID | Symbol | TMT ratio (high/low) | Protein description                                                               |
|------------|--------|----------------------|-----------------------------------------------------------------------------------|
| P69776     | lpp    | 0.8447712            | Major outer membrane lipoprotein OS=Escherichia coli O6 GN=lpp                    |
| P06715     | gor    | 0.845186             | Glutathione reductase OS=Escherichia coli O6 GN=gor                               |
| P36659     | cbpA   | 0.846235             | Curved DNA-binding protein OS=Escherichia coli O6 GN=cbpA                         |
| P0A7L3     | rplT   | 0.8471887            | 50S ribosomal protein L20 OS=Escherichia coli O6 GN=rplT                          |
| P08192     | folC   | 0.8477285            | FolC bifunctional protein OS=Escherichia coli O6 GN=folC                          |
| P0ACB2     | hemB   | 0.8488563            | Delta-aminolevulinic acid dehydratase OS=Escherichia coli O6 GN=hemB              |
| P0A7M6     | rpmC   | 0.8493525            | 50S ribosomal protein L29 OS=Escherichia coli O6 GN=rpmC                          |
| P0AC41     | sdhA   | 0.8501422            | Succinate dehydrogenase flavoprotein subunit OS=Escherichia coli O6 GN=sdhA       |
| P13029     | katG   | 0.853388             | Catalase-peroxidase OS=Escherichia coli O6 GN=katG                                |
| A0A0H2V701 | c1248  | 0.8539515            | Putative uncharacterized protein OS=Escherichia coli O6 GN=c1248                  |
| Q8FD60     | nanK1  | 0.8540907            | N-acetylmannosamine kinase OS=Escherichia coli O6 GN=nanK1                        |
| P0DMC5     | rscC   | 0.8559814            | Sensor histidine kinase rscC OS=Escherichia coli O6 GN=rscC                       |
| P0A884     | thyA   | 0.8566369            | Thymidylate synthase OS=Escherichia coli O6 GN=thyA                               |
| P0AF50     | yjbR   | 0.8584167            | Uncharacterized protein OS=Escherichia coli O6 GN=yjbR                            |
| P10100     | rlpA   | 0.859582             | Rare lipoprotein A OS=Escherichia coli O6 GN=rlpA                                 |
| A0A0H2V9V5 | c2496  | 0.8604387            | Putative uncharacterized protein OS=Escherichia coli O6 GN=c2496                  |
| P28249     | dgt    | 0.8607062            | Deoxyguanosinetriphosphate triphosphohydrolase OS=Escherichia coli O6 GN=dgt      |
| P63020     | nfuA   | 0.8619257            | Fe/S biogenesis protein nfuA OS=Escherichia coli O6 GN=nfuA                       |
| W8ZQ81     | icdA   | 0.862156             | Isocitrate dehydrogenase (NADP) OS=Escherichia coli O6 GN=icdA                    |
| P0A8C4     | ygfB   | 0.862836             | UPF0149 protein ygfB OS=Escherichia coli O6 GN=ygfB                               |
| P39177     | uspG   | 0.864485             | Universal stress protein G OS=Escherichia coli O6 GN=uspG                         |
| P0A805     | frr    | 0.8655674            | Ribosome-recycling factor OS=Escherichia coli O6 GN=frr                           |
| P12994     | ybhB   | 0.8669044            | Protein ybhB OS=Escherichia coli O6 GN=ybhB                                       |
| P0DP64     | ybeM   | 0.8670979            | Putative amidase OS=Escherichia coli O6 GN=ybeM                                   |
| P22186     | mraZ   | 0.8671283            | Protein MraZ OS=Escherichia coli O6 GN=mraZ                                       |
| P77756     | queC   | 0.8675475            | 7-cyano-7-deazaguanine synthase OS=Escherichia coli O6 GN=queC                    |
| P0A9K9     | slyD   | 0.8705743            | FKBP-type peptidyl-prolyl cis-trans isomerase slyD OS=Escherichia coli O6 GN=slyD |
| P16659     | proS   | 0.8730212            | Prolyl-tRNA synthetase OS=Escherichia coli O6 GN=proS                             |
| P25526     | gabD   | 0.8730911            | Succinate-semialdehyde dehydrogenase (NADP+) OS=Escherichia coli O6 GN=gabD       |

| Uniprot ID | Symbol | TMT ratio (high/low) | Protein description                                                                             |
|------------|--------|----------------------|-------------------------------------------------------------------------------------------------|
| P0A749     | murA   | 0.8737785            | UDP-N-acetylglucosamine 1-carboxyvinyltransferase OS=Escherichia coli O6 GN=murA                |
| P0A7K6     | rplS   | 0.8738765            | 50S ribosomal protein L19 OS=Escherichia coli O6 GN=rplS                                        |
| P0A800     | rpoZ   | 0.8739955            | DNA-directed RNA polymerase subunit omega OS=Escherichia coli O6 GN=rpoZ                        |
| P36771     | lrhA   | 0.8740274            | Probable transcriptional regulator LrhA OS=Escherichia coli O6 GN=lrhA                          |
| P33354     | yehR   | 0.874531             | Hypothetical lipoprotein yehR OS=Escherichia coli O6 GN=yehR                                    |
| A0A0H2VDX6 | c5447  | 0.8757431            | Putative uncharacterized protein OS=Escherichia coli O6 GN=c5447                                |
| P0A9B2     | gapA   | 0.8781931            | Glyceraldehyde-3-phosphate dehydrogenase A OS=Escherichia coli O6 GN=gapA                       |
| A0A0H2V8L8 | c2458  | 0.8788131            | Putative peptide synthetase OS=Escherichia coli O6 GN=c2458                                     |
| P0AFX4     | rsd    | 0.8802881            | Regulator of sigma D OS=Escherichia coli O6 GN=rsd                                              |
| P0ACJ8     | crp    | 0.8813287            | Catabolite gene activator OS=Escherichia coli O6 GN=crp                                         |
| P0A7M9     | rpmE   | 0.8817148            | 50S ribosomal protein L31 OS=Escherichia coli O6 GN=rpmE                                        |
| P19926     | agp    | 0.8817427            | Glucose-1-phosphatase OS=Escherichia coli O6 GN=agp                                             |
| W8ZXJ1     | yhbH   | 0.8841731            | Probable sigma-54 modulation protein OS=Escherichia coli O6 GN=yhbH                             |
| P0A7A9     | ppa    | 0.8843632            | Inorganic pyrophosphatase OS=Escherichia coli O6 GN=ppa                                         |
| P0A7K2     | rplL   | 0.8849573            | 50S ribosomal protein L7/L12 OS=Escherichia coli O6 GN=rplL                                     |
| P09424     | mtlD   | 0.8858564            | Mannitol-1-phosphate 5-dehydrogenase OS=Escherichia coli O6 GN=mtlD                             |
| P0ADN2     | yifE   | 0.8875468            | UPF0438 protein yifE OS=Escherichia coli O6 GN=yifE                                             |
| P32131     | hemN   | 0.8877272            | Oxygen-independent coproporphyrinogen III oxidase OS=Escherichia coli O6 GN=hemN                |
| P64506     | yebY   | 0.8884845            | Uncharacterized protein OS=Escherichia coli O6 GN=yebY                                          |
| P0ABT2     | dps    | 0.8902183            | DNA protection during starvation protein OS=Escherichia coli O6 GN=dps                          |
| P0A6H5     | hslU   | 0.8918183            | ATP-dependent protease ATPase subunit HslU OS=Escherichia coli O6 GN=hslU                       |
| P39300     | ulaG   | 0.8921955            | Probable L-ascorbate-6-phosphate lactonase ulaG OS=Escherichia coli O6 GN=ulaG                  |
| P0A744     | msrA   | 0.892828             | Peptide methionine sulfoxide reductase msrA OS=Escherichia coli O6 GN=msrA                      |
| P0AGG4     | trxC   | 0.8934964            | Thioredoxin 2 OS=Escherichia coli O6 GN=trxC                                                    |
| W9ALK8     | yhiR   | 0.8935003            | Putative uncharacterized protein yhiR OS=Escherichia coli O6 GN=yhiR                            |
| P0AD61     | pykF   | 0.8936632            | Pyruvate kinase I OS=Escherichia coli O6 GN=pykF                                                |
| P17169     | glmS   | 0.8940766            | Glucosamine--fructose-6-phosphate aminotransferase [isomerizing] OS=Escherichia coli O6 GN=glmS |
| P0A6F9     | grosS  | 0.8953768            | 10 kDa chaperonin OS=Escherichia coli O6 GN=grosS                                               |
| P75746     | ybgI   | 0.8960229            | UPF0271 protein ybgI OS=Escherichia coli O6 GN=ybgI                                             |

| Uniprot ID | Symbol | TMT ratio (high/low) | Protein description                                                                        |
|------------|--------|----------------------|--------------------------------------------------------------------------------------------|
| Q46920     | queF   | 0.8961411            | NADPH-dependent 7-cyano-7-deazaguanine reductase OS=Escherichia coli O6 GN=queF            |
| P25714     | yajC   | 0.8965712            | UPF0092 membrane protein yajC OS=Escherichia coli O6 GN=yajC                               |
| P0ABA0     | atpF   | 0.8976695            | ATP synthase subunit b OS=Escherichia coli O6 GN=atpF                                      |
| P0AEW4     | icc    | 0.8987035            | icc protein OS=Escherichia coli O6 GN=icc                                                  |
| P0AE52     | bcp    | 0.9004762            | Putative peroxiredoxin bcp OS=Escherichia coli O6 GN=bcp                                   |
| P37689     | gpml   | 0.9005146            | 2,3-bisphosphoglycerate-independent phosphoglycerate mutase OS=Escherichia coli O6 GN=gpml |
| Q46845     | yghU   | 0.9007078            | Hypothetical GST-like protein yghU OS=Escherichia coli O6 GN=yghU                          |
| P04805     | gltX   | 0.903203             | Glutamyl-tRNA synthetase OS=Escherichia coli O6 GN=gltX                                    |
| P0ABD8     | argB   | 0.9037436            | Acetylglutamate kinase OS=Escherichia coli O6 GN=argB                                      |
| P22564     | rihC   | 0.9054682            | Non-specific ribonucleoside hydrolase rihC OS=Escherichia coli O6 GN=rihC                  |
| P07862     | ddlB   | 0.9058561            | D-alanine--D-alanine ligase B OS=Escherichia coli O6 GN=ddlB                               |
| A0A0H2VAP3 | c2895  | 0.9059055            | YapH homolog OS=Escherichia coli O6 GN=c2895                                               |
| P0A6X3     | hfq    | 0.9062833            | RNA-binding protein hfq OS=Escherichia coli O6 GN=hfq                                      |
| P0AGE0     | ssb    | 0.9065669            | Single-stranded DNA-binding protein OS=Escherichia coli O6 GN=ssb                          |
| P21367     | ycaC   | 0.9068393            | Protein ycaC OS=Escherichia coli O6 GN=ycaC                                                |
| P0A8A2     | yeeN   | 0.9091156            | UPF0082 protein yeeN OS=Escherichia coli O6 GN=yeeN                                        |
| P0ADU2     | ygiN   | 0.910486             | Protein ygiN OS=Escherichia coli O6 GN=ygiN                                                |
| P00968     | carB   | 0.9107106            | Carbamoyl-phosphate synthase large chain OS=Escherichia coli O6 GN=carB                    |
| P0AB77     | kbl    | 0.9128605            | 2-amino-3-ketobutyrate coenzyme A ligase OS=Escherichia coli O6 GN=kbl                     |
| P0A720     | tmk    | 0.9135802            | Thymidylate kinase OS=Escherichia coli O6 GN=tmk                                           |
| P24215     | uxuA   | 0.9145486            | Mannonate dehydratase OS=Escherichia coli O6 GN=uxuA                                       |
| W8Z5B0     | yjdB   | 0.9146416            | Putative uncharacterized protein yjdB OS=Escherichia coli O6 GN=yjdB                       |
| W9ALV3     | yibH   | 0.9148805            | Putative uncharacterized protein yibH OS=Escherichia coli O6 GN=yibH                       |
| P0A8Z0     | yciA   | 0.9153877            | Acyl-CoA thioester hydrolase YciA OS=Escherichia coli O6 GN=yciA                           |
| P0ADZ0     | rplW   | 0.9155898            | 50S ribosomal protein L23 OS=Escherichia coli O6 GN=rplW                                   |
| P61517     | yadF   | 0.9157022            | Protein yadF OS=Escherichia coli O6 GN=yadF                                                |
| P0ABP8     | deoD   | 0.918489             | Purine nucleoside phosphorylase deoD-type OS=Escherichia coli O6 GN=deoD                   |
| P0A7L8     | rpmA   | 0.918672             | 50S ribosomal protein L27 OS=Escherichia coli O6 GN=rpmA                                   |
| P0AE01     | trmJ   | 0.9202312            | tRNA (cytidine/uridine-2&#039;-O-)-methyltransferase TrmJ OS=Escherichia coli O6 GN=trmJ   |

| Uniprot ID | Symbol | TMT ratio (high/low) | Protein description                                                         |
|------------|--------|----------------------|-----------------------------------------------------------------------------|
| P28250     | phrB   | 0.9202729            | Deoxyribodipyrimidine photolyase OS=Escherichia coli O6 GN=phrB             |
| P0A6S7     | gpsA   | 0.9206434            | Glycerol-3-phosphate dehydrogenase [NAD(P)+] OS=Escherichia coli O6 GN=gpsA |
| AOA0H2VDJ1 | c5314  | 0.9212071            | Protein ytfJ OS=Escherichia coli O6 GN=c5314                                |
| AOA0H2VBF4 | c2791  | 0.9220318            | CinA-like protein OS=Escherichia coli O6 GN=c2791                           |
| P0ADA5     | yajG   | 0.9229028            | Uncharacterized lipoprotein yajG OS=Escherichia coli O6 GN=yajG             |
| P21889     | aspS   | 0.9229835            | Aspartyl-tRNA synthetase OS=Escherichia coli O6 GN=aspS                     |
| P61889     | mdh    | 0.9236081            | Malate dehydrogenase OS=Escherichia coli O6 GN=mdh                          |
| P63284     | clpB   | 0.9241559            | Chaperone protein ClpB OS=Escherichia coli O6 GN=clpB                       |
| P00370     | gdhA   | 0.9248307            | NADP-specific glutamate dehydrogenase OS=Escherichia coli O6 GN=gdhA        |
| P0A8J4     | ybeD   | 0.9250576            | UPF0250 protein ybeD OS=Escherichia coli O6 GN=ybeD                         |
| P0ACU7     | yjdC   | 0.9257843            | HTH-type transcriptional regulator yjdC OS=Escherichia coli O6 GN=yjdC      |
| P30125     | leuB   | 0.9258521            | 3-isopropylmalate dehydrogenase OS=Escherichia coli O6 GN=leuB              |
| P76402     | yegP   | 0.9267111            | UPF0339 protein YegP OS=Escherichia coli O6 GN=yegP                         |
| Q8FD58     | nanA1  | 0.9274534            | N-acetylneuraminate lyase 1 OS=Escherichia coli O6 GN=nanA1                 |
| P0AD49     | raiA   | 0.9277487            | Ribosome-associated inhibitor A OS=Escherichia coli O6 GN=raiA              |
| P0A6I3     | coaA   | 0.9281533            | Pantothenate kinase OS=Escherichia coli O6 GN=coaA                          |
| P28904     | treC   | 0.9281884            | Trehalose-6-phosphate hydrolase OS=Escherichia coli O6 GN=treC              |
| P65298     | yqhH   | 0.9282297            | Uncharacterized lipoprotein YqhH OS=Escherichia coli O6 GN=yqhH             |
| P04983     | rbsA   | 0.929674             | Ribose import ATP-binding protein RbsA OS=Escherichia coli O6 GN=rbsA       |
| P33607     | nuoI   | 0.9305735            | NADH-quinone oxidoreductase subunit L OS=Escherichia coli O6 GN=nuoI        |
| P07012     | prfB   | 0.9313501            | Peptide chain release factor 2 OS=Escherichia coli O6 GN=prfB               |
| P0AG30     | rho    | 0.9314694            | Transcription termination factor Rho OS=Escherichia coli O6 GN=rho          |
| P0AAX8     | ybiS   | 0.9322858            | Probable L,D-transpeptidase YbiS OS=Escherichia coli O6 GN=ybiS             |
| P0A6T5     | folE   | 0.932733             | GTP cyclohydrolase 1 OS=Escherichia coli O6 GN=folE                         |
| P05020     | pyrC   | 0.9343897            | Dihydroorotase OS=Escherichia coli O6 GN=pyrC                               |
| P24175     | manB   | 0.9352568            | Phosphomannomutase OS=Escherichia coli O6 GN=manB                           |
| P0A7R1     | rpII   | 0.9363161            | 50S ribosomal protein L9 OS=Escherichia coli O6 GN=rpII                     |
| P69451     | fadD   | 0.936644             | Long-chain-fatty-acid--CoA ligase OS=Escherichia coli O6 GN=fadD            |
| P27434     | rodZ   | 0.936823             | Cytoskeleton protein rodZ OS=Escherichia coli O6 GN=rodZ                    |

| Uniprot ID | Symbol | TMT ratio (high/low) | Protein description                                                              |
|------------|--------|----------------------|----------------------------------------------------------------------------------|
| P25519     | hflX   | 0.9377653            | GTP-binding protein hflX OS=Escherichia coli O6 GN=hflX                          |
| P06986     | ruvA   | 0.9384372            | Holliday junction ATP-dependent DNA helicase ruvA OS=Escherichia coli O6 GN=ruvA |
| P0A7Z0     | rpiA   | 0.9386511            | Ribose-5-phosphate isomerase A OS=Escherichia coli O6 GN=rpiA                    |
| P0AFI7     | pdxH   | 0.9392393            | Pyridoxine/pyridoxamine 5-phosphate oxidase OS=Escherichia coli O6 GN=pdxH       |
| P0AF08     | mrp    | 0.9392424            | Protein mrp OS=Escherichia coli O6 GN=mrp                                        |
| P0A9J8     | pheA   | 0.9400605            | P-protein OS=Escherichia coli O6 GN=pheA                                         |
| P0A7D1     | pth    | 0.9418367            | Peptidyl-tRNA hydrolase OS=Escherichia coli O6 GN=pth                            |
| P0A877     | trpA   | 0.9420978            | Tryptophan synthase alpha chain OS=Escherichia coli O6 GN=trpA                   |
| P60757     | hisG   | 0.9430731            | ATP phosphoribosyltransferase OS=Escherichia coli O6 GN=hisG                     |
| P0AAI5     | fabF   | 0.9440827            | 3-oxoacyl-[acyl-carrier-protein] synthase 2 OS=Escherichia coli O6 GN=fabF       |
| P33352     | yehP   | 0.9441816            | Uncharacterized protein YehP OS=Escherichia coli O6 GN=yehP                      |
| P0AG51     | rpmD   | 0.9447352            | 50S ribosomal protein L30 OS=Escherichia coli O6 GN=rpmD                         |
| P00954     | trpS   | 0.9447805            | Tryptophanyl-tRNA synthetase OS=Escherichia coli O6 GN=trpS                      |
| W8ZWJ4     | speC   | 0.9452055            | Ornithine decarboxylase, constitutive OS=Escherichia coli O6 GN=speC             |
| P27828     | wecB   | 0.9462001            | UDP-N-acetylglucosamine 2-epimerase OS=Escherichia coli O6 GN=wecB               |
| P76008     | ldcA   | 0.9473117            | Murein tetrapeptide carboxypeptidase OS=Escherichia coli O6 GN=ldcA              |
| P0A9H5     | btuR   | 0.9474857            | Cob(I)yrinic acid a,c-diamide adenosyltransferase OS=Escherichia coli O6 GN=btuR |
| P0AC53     | zwf    | 0.9485207            | Glucose-6-phosphate 1-dehydrogenase OS=Escherichia coli O6 GN=zwf                |
| P0A7C6     | pepE   | 0.9486179            | Peptidase E OS=Escherichia coli O6 GN=pepE                                       |
| P36938     | pgm    | 0.949223             | Phosphoglucomutase OS=Escherichia coli O6 GN=pgm                                 |
| A0A0H2VBP8 | c4265  | 0.9494482            | DcrB protein OS=Escherichia coli O6 GN=c4265                                     |
| P0ADZ4     | rpsO   | 0.9509459            | 30S ribosomal protein S15 OS=Escherichia coli O6 GN=rpsO                         |
| A0A0H2V6Q3 | c1549  | 0.9511294            | Putative replication protein O of bacteriophage OS=Escherichia coli O6 GN=c1549  |
| P0AA10     | rplM   | 0.9515223            | 50S ribosomal protein L13 OS=Escherichia coli O6 GN=rplM                         |
| P0AD57     | ispB   | 0.9515437            | Octaprenyl-diphosphate synthase OS=Escherichia coli O6 GN=ispB                   |
| P0A8P3     | yggX   | 0.9516683            | Probable Fe(2+)-trafficking protein OS=Escherichia coli O6 GN=yggX               |
| P02943     | lamB   | 0.9525443            | Maltoporin OS=Escherichia coli O6 GN=lamB                                        |
| P0A6L9     | hscB   | 0.9530138            | Co-chaperone protein hscB OS=Escherichia coli O6 GN=hscB                         |
| W8ZUT7     | yfiQ   | 0.9531328            | Putative uncharacterized protein yfiQ OS=Escherichia coli O6 GN=yfiQ             |

| Uniprot ID | Symbol | TMT ratio (high/low) | Protein description                                                                                    |
|------------|--------|----------------------|--------------------------------------------------------------------------------------------------------|
| P04968     | ilvA   | 0.9531419            | Threonine dehydratase biosynthetic OS=Escherichia coli O6 GN=ilvA                                      |
| P28635     | yaeC   | 0.9534414            | D-methionine-binding lipoprotein metQ OS=Escherichia coli O6 GN=yaeC                                   |
| P09372     | grpE   | 0.9535396            | Protein grpE OS=Escherichia coli O6 GN=grpE                                                            |
| P23893     | hemL   | 0.9539492            | Glutamate-1-semialdehyde 2,1-aminomutase OS=Escherichia coli O6 GN=hemL                                |
| A0A0H2V646 | c1234  | 0.9546149            | Putative uncharacterized protein OS=Escherichia coli O6 GN=c1234                                       |
| P0AFQ7     | ycfH   | 0.954654             | Uncharacterized deoxyribonuclease ycfH OS=Escherichia coli O6 GN=ycfH                                  |
| P61714     | ribE   | 0.9552366            | Riboflavin synthase alpha chain OS=Escherichia coli O6 GN=ribE                                         |
| Q47622     | sapA   | 0.9552916            | Peptide transport periplasmic protein sapA OS=Escherichia coli O6 GN=sapA                              |
| P0A8K1     | psd    | 0.9557835            | Phosphatidylserine decarboxylase proenzyme OS=Escherichia coli O6 GN=psd                               |
| P00509     | aspC   | 0.9561746            | Aspartate aminotransferase OS=Escherichia coli O6 GN=aspC                                              |
| P0A9M5     | gpt    | 0.9564491            | Xanthine phosphoribosyltransferase OS=Escherichia coli O6 GN=gpt                                       |
| P0AG44     | rplQ   | 0.9564511            | 50S ribosomal protein L17 OS=Escherichia coli O6 GN=rplQ                                               |
| P02929     | tonB   | 0.9570335            | Protein TonB OS=Escherichia coli O6 GN=tonB                                                            |
| A0A0H2V8P3 | c1468  | 0.9574397            | Putative uncharacterized protein OS=Escherichia coli O6 GN=c1468                                       |
| P0A7E9     | pyrH   | 0.9580057            | Uridylate kinase OS=Escherichia coli O6 GN=pyrH                                                        |
| P52697     | pgl    | 0.9594797            | 6-phosphogluconolactonase OS=Escherichia coli O6 GN=pgl                                                |
| P24171     | dcp    | 0.9599525            | Peptidyl-dipeptidase dcp OS=Escherichia coli O6 GN=dcp                                                 |
| P0A6L2     | dapA   | 0.9600044            | Dihydrodipicolinate synthase OS=Escherichia coli O6 GN=dapA                                            |
| W8ZRS2     | yiiM   | 0.9606998            | Putative uncharacterized protein yiiM OS=Escherichia coli O6 GN=yiiM                                   |
| A0A0H2V970 | c2909  | 0.9614035            | Probable oxalyl-CoA decarboxylase OS=Escherichia coli O6 GN=c2909                                      |
| A0A0H2VAZ0 | kpsD   | 0.961729             | KpsD protein OS=Escherichia coli O6 GN=kpsD                                                            |
| P0A6A8     | acpP   | 0.9618343            | Acyl carrier protein OS=Escherichia coli O6 GN=acpP                                                    |
| P42632     | tdcE   | 0.9622552            | Keto-acid formate acetyltransferase OS=Escherichia coli O6 GN=tdcE                                     |
| P0AG67     | rpsA   | 0.9623354            | 30S ribosomal protein S1 OS=Escherichia coli O6 GN=rpsA                                                |
| P60651     | speB   | 0.9626448            | Agmatinase OS=Escherichia coli O6 GN=speB                                                              |
| A0A0H2VD08 | c5040  | 0.962946             | Putative c4-dicarboxylate transport transcriptional Regulatory protein OS=Escherichia coli O6 GN=c5040 |
| P0ABB4     | atpD   | 0.9636745            | ATP synthase subunit beta OS=Escherichia coli O6 GN=atpD                                               |
| P0A7L0     | rplA   | 0.9650644            | 50S ribosomal protein L1 OS=Escherichia coli O6 GN=rplA                                                |
| P24183     | fdnG   | 0.9651743            | Formate dehydrogenase, nitrate-inducible, major subunit OS=Escherichia coli O6 GN=fdnG                 |

| Uniprot ID | Symbol | TMT ratio (high/low) | Protein description                                                                           |
|------------|--------|----------------------|-----------------------------------------------------------------------------------------------|
| P76658     | hldE   | 0.9652517            | Bifunctional protein hldE OS=Escherichia coli O6 GN=hldE                                      |
| Q46938     | kdul   | 0.9657202            | 4-deoxy-L-threo-5-hexosulose-uronate ketol-isomerase OS=Escherichia coli O6 GN=kdul           |
| P0ACQ4     | oxyR   | 0.9657913            | Hydrogen peroxide-inducible genes activator OS=Escherichia coli O6 GN=oxyR                    |
| P62399     | rpIE   | 0.9662233            | 50S ribosomal protein L5 OS=Escherichia coli O6 GN=rpIE                                       |
| P0A847     | tgt    | 0.9666707            | Queuine tRNA-ribosyltransferase OS=Escherichia coli O6 GN=tgt                                 |
| P0A7F6     | speD   | 0.9673098            | S-adenosylmethionine decarboxylase proenzyme OS=Escherichia coli O6 GN=speD                   |
| P0A7C2     | lexA   | 0.9676618            | LexA repressor OS=Escherichia coli O6 GN=lexA                                                 |
| P38489     | nfnB   | 0.9703126            | Oxygen-insensitive NAD(P)H nitroreductase OS=Escherichia coli O6 GN=nfnB                      |
| P16689     | phnM   | 0.971306             | PhnM protein OS=Escherichia coli O6 GN=phnM                                                   |
| P0AE88     | cpxR   | 0.972232             | Transcriptional Regulatory protein cpxR OS=Escherichia coli O6 GN=cpxR                        |
| P0ABB0     | atpA   | 0.9724777            | ATP synthase subunit alpha OS=Escherichia coli O6 GN=atpA                                     |
| P0A6X7     | ihfA   | 0.9726279            | Integration host factor subunit alpha OS=Escherichia coli O6 GN=ihfA                          |
| P0AET8     | hdhA   | 0.9735078            | 7-alpha-hydroxysteroid dehydrogenase OS=Escherichia coli O6 GN=hdhA                           |
| P77360     | yphC   | 0.975089             | Hypothetical zinc-type alcohol dehydrogenase-like protein yphC OS=Escherichia coli O6 GN=yphC |
| P0ACS7     | rpiR   | 0.9752966            | HTH-type transcriptional regulator rpiR OS=Escherichia coli O6 GN=rpiR                        |
| P0ABA6     | atpG   | 0.9753356            | ATP synthase gamma chain OS=Escherichia coli O6 GN=atpG                                       |
| P0A8M6     | yeeX   | 0.9779334            | UPF0265 protein yeeX OS=Escherichia coli O6 GN=yeeX                                           |
| P00926     | dsdA   | 0.9787521            | D-serine dehydratase OS=Escherichia coli O6 GN=dsdA                                           |
| P0AF36     | zapB   | 0.9787733            | Cell division protein ZapB OS=Escherichia coli O6 GN=zapB                                     |
| P0A8E7     | yajQ   | 0.9789294            | UPF0234 protein yajQ OS=Escherichia coli O6 GN=yajQ                                           |
| P39099     | degQ   | 0.9793609            | Protease degQ OS=Escherichia coli O6 GN=degQ                                                  |
| P0AC02     | yfiO   | 0.9796315            | UPF0169 lipoprotein yfiO OS=Escherichia coli O6 GN=yfiO                                       |
| P69222     | infA   | 0.9802739            | Translation initiation factor IF-1 OS=Escherichia coli O6 GN=infA                             |
| P30850     | rnb    | 0.9804949            | Exoribonuclease 2 OS=Escherichia coli O6 GN=rnb                                               |
| P39173     | yeaD   | 0.9824176            | Putative uncharacterized protein yeaD OS=Escherichia coli O6 GN=yeaD                          |
| Q47147     | yafJ   | 0.9826329            | Putative uncharacterized protein yafJ OS=Escherichia coli O6 GN=yafJ                          |
| A0A0H2V689 | c0290  | 0.9831164            | Putative uncharacterized protein OS=Escherichia coli O6 GN=c0290                              |
| P33355     | yehS   | 0.9864611            | Putative uncharacterized protein yehS OS=Escherichia coli O6 GN=yehS                          |
| P45464     | yraM   | 0.9867478            | Putative uncharacterized protein yraM OS=Escherichia coli O6 GN=yraM                          |

| Uniprot ID | Symbol | TMT ratio (high/low) | Protein description                                                                                   |
|------------|--------|----------------------|-------------------------------------------------------------------------------------------------------|
| P11454     | entF   | 0.987505             | Enterobactin synthetase component F OS=Escherichia coli O6 GN=entF                                    |
| P0AFG8     | aceE   | 0.9875818            | Pyruvate dehydrogenase E1 component OS=Escherichia coli O6 GN=aceE                                    |
| AOA0H2V9J3 | c2988  | 0.9878307            | NADP-dependent malic enzyme OS=Escherichia coli O6 GN=c2988                                           |
| P0A8A8     | rimP   | 0.9879622            | Ribosome maturation factor rimP OS=Escherichia coli O6 GN=rimP                                        |
| P75919     | ymdC   | 0.9880804            | Putative uncharacterized protein ymdC OS=Escherichia coli O6 GN=ymdC                                  |
| P37194     | slp    | 0.988227             | Outer membrane protein slp OS=Escherichia coli O6 GN=slp                                              |
| P0AFK0     | pmbA   | 0.9884799            | PmbA protein OS=Escherichia coli O6 GN=pmbA                                                           |
| P07762     | glgB   | 0.9894007            | 1,4-alpha-glucan-branching enzyme OS=Escherichia coli O6 GN=glgB                                      |
| P29217     | yceH   | 0.9911307            | UPF0502 protein yceH OS=Escherichia coli O6 GN=yceH                                                   |
| P0ABC7     | hflK   | 0.9915433            | HflK protein OS=Escherichia coli O6 GN=hflK                                                           |
| W8ZMC2     | yggE   | 0.9926496            | Putative uncharacterized protein yggE OS=Escherichia coli O6 GN=yggE                                  |
| P0A7V0     | rpsB   | 0.9935321            | 30S ribosomal protein S2 OS=Escherichia coli O6 GN=rpsB                                               |
| P0A7P5     | rpmH   | 0.9935931            | 50S ribosomal protein L34 OS=Escherichia coli O6 GN=rpmH                                              |
| O07813     | leuS   | 0.995003             | Leucyl-tRNA synthetase OS=Escherichia coli O6 GN=leuS                                                 |
| P33195     | gcvP   | 0.9950919            | Glycine dehydrogenase [decarboxylating] OS=Escherichia coli O6 GN=gcvP                                |
| P30745     | moaA   | 0.9951691            | GTP 3',8-cyclase OS=Escherichia coli O6 GN=moaA                                                       |
| P36562     | cobT   | 0.9956986            | Nicotinate-nucleotide--dimethylbenzimidazole phosphoribosyltransferase OS=Escherichia coli O6 GN=cobT |
| P0AB51     | dksA   | 0.9960705            | DnaK suppressor protein OS=Escherichia coli O6 GN=dksA                                                |
| P07001     | pntA   | 0.9961597            | NAD(P) transhydrogenase subunit alpha OS=Escherichia coli O6 GN=pntA                                  |
| P0AEA8     | cysG   | 0.9967812            | Siroheme synthase OS=Escherichia coli O6 GN=cysG                                                      |
| P0AFJ1     | phnA   | 0.9968022            | Protein PhnA OS=Escherichia coli O6 GN=phnA                                                           |
| P77433     | ykgG   | 0.9979899            | Uncharacterized protein YkgG OS=Escherichia coli O6 GN=ykgG                                           |
| P0AB71     | fba    | 0.9982909            | Fructose-bisphosphate aldolase class 2 OS=Escherichia coli O6 GN=fba                                  |
| P68567     | yhiQ   | 0.9985352            | Ribosomal RNA small subunit methyltransferase J OS=Escherichia coli O6 GN=yhiQ                        |
| P30860     | artJ   | 0.9988543            | Arginine-binding periplasmic protein 2 OS=Escherichia coli O6 GN=artJ                                 |
| P0A955     | eda    | 0.9993178            | KHG/KDPG aldolase OS=Escherichia coli O6 GN=eda                                                       |
| P0C0L2     | osmC   | 0.9993726            | Osmotically inducible protein C OS=Escherichia coli O6 GN=osmC                                        |
| P0A9P0     | lpdA   | 0.9993731            | Dihydrolipoyl dehydrogenase OS=Escherichia coli O6 GN=lpdA                                            |



| Uniprot ID | Symbol | TMT ratio (high/low) | Protein description                                                                                                      |
|------------|--------|----------------------|--------------------------------------------------------------------------------------------------------------------------|
| P0AAK7     | nrfC   | 0.9998052            | NrfC protein OS=Escherichia coli O6 GN=nrfC                                                                              |
| Q46829     | bglA   | 1.000338             | 6-phospho-beta-glucosidase bglA OS=Escherichia coli O6 GN=bglA                                                           |
| P00561     | thrA   | 1.000779             | Aspartokinase I OS=Escherichia coli O6 GN=thrA                                                                           |
| P0A7U3     | rpsS   | 1.000943             | 30S ribosomal protein S19 OS=Escherichia coli O6 GN=rpsS                                                                 |
| P24192     | hypD   | 1.001229             | Hydrogenase isoenzymes formation protein hypD OS=Escherichia coli O6 GN=hypD                                             |
| W8ZN03     | yghZ   | 1.002298             | Putative uncharacterized protein yghZ OS=Escherichia coli O6 GN=yghZ                                                     |
| P0A799     | pgk    | 1.00238              | Phosphoglycerate kinase OS=Escherichia coli O6 GN=pgk                                                                    |
| Q7WTI7     | iroC   | 1.002481             | IroC OS=Escherichia coli O6 GN=iroC                                                                                      |
| P02359     | rpsG   | 1.002843             | 30S ribosomal protein S7 OS=Escherichia coli O6 GN=rpsG                                                                  |
| P0A7Z4     | rpoA   | 1.002946             | DNA-directed RNA polymerase subunit alpha OS=Escherichia coli O6 GN=rpoA                                                 |
| P69783     | crr    | 1.003248             | Glucose-specific phosphotransferase enzyme IIA component OS=Escherichia coli O6 GN=crr                                   |
| P0AGG2     | tesB   | 1.006661             | Acyl-CoA thioesterase II OS=Escherichia coli O6 GN=tesB                                                                  |
| P15288     | pepD   | 1.00708              | Aminoacyl-histidine dipeptidase OS=Escherichia coli O6 GN=pepD                                                           |
| P0A780     | nusB   | 1.009435             | N utilization substance protein B OS=Escherichia coli O6 GN=nusB                                                         |
| A0A0H2VC65 | c4537  | 1.009762             | Putative conserved protein OS=Escherichia coli O6 GN=c4537                                                               |
| P0A7J7     | rplK   | 1.010151             | 50S ribosomal protein L11 OS=Escherichia coli O6 GN=rplK                                                                 |
| P0A8T7     | rpoC   | 1.010286             | DNA-directed RNA polymerase subunit beta<sup>3</sup> OS=Escherichia coli O6 GN=rpoC                                      |
| P0A7J3     | rplJ   | 1.010336             | 50S ribosomal protein L10 OS=Escherichia coli O6 GN=rplJ                                                                 |
| P60595     | hisH   | 1.011038             | Imidazole glycerol phosphate synthase subunit hisH OS=Escherichia coli O6 GN=hisH                                        |
| P0AFC7     | nuoB   | 1.01114              | NADH-quinone oxidoreductase subunit B OS=Escherichia coli O6 GN=nuoB                                                     |
| P37095     | pepB   | 1.011572             | Peptidase B OS=Escherichia coli O6 GN=pepB                                                                               |
| P22524     | mukE   | 1.011988             | Chromosome partition protein mukE OS=Escherichia coli O6 GN=mukE                                                         |
| P0A858     | tpiA   | 1.012311             | Triosephosphate isomerase OS=Escherichia coli O6 GN=tpiA                                                                 |
| P31979     | nuoF   | 1.013231             | NADH dehydrogenase I chain F OS=Escherichia coli O6 GN=nuoF                                                              |
| P0A6M8     | fusA   | 1.013397             | Elongation factor G OS=Escherichia coli O6 GN=fusA                                                                       |
| P76513     | yfdQ   | 1.013453             | Uncharacterized protein YfdQ OS=Escherichia coli O6 GN=yfdQ                                                              |
| P60472     | uppS   | 1.014031             | Ditrans,polycis-undecaprenyl-diphosphate synthase ((2E,6E)-farnesyl-diphosphate specific) OS=Escherichia coli O6 GN=uppS |
| P05825     | fepA   | 1.015013             | Ferrienterobactin receptor OS=Escherichia coli O6 GN=fepA                                                                |

| Uniprot ID | Symbol | TMT ratio (high/low) | Protein description                                                             |
|------------|--------|----------------------|---------------------------------------------------------------------------------|
| P76352     | yeeO   | 1.016193             | Probable FMN/FAD exporter YeeO OS=Escherichia coli O6 GN=yeeO                   |
| P0AG14     | sohB   | 1.017327             | Possible protease sohB OS=Escherichia coli O6 GN=sohB                           |
| P00963     | asnA   | 1.017754             | Aspartate--ammonia ligase OS=Escherichia coli O6 GN=asnA                        |
| P0ABH7     | gltA   | 1.018132             | Citrate synthase OS=Escherichia coli O6 GN=gltA                                 |
| P0AC51     | yjbK   | 1.019932             | Zinc uptake regulation protein OS=Escherichia coli O6 GN=yjbK                   |
| P08373     | murB   | 1.020373             | UDP-N-acetylenolpyruvoylglucosamine reductase OS=Escherichia coli O6 GN=murB    |
| P0AA43     | rsuA   | 1.020647             | Ribosomal small subunit pseudouridine synthase A OS=Escherichia coli O6 GN=rsuA |
| P46853     | yhhX   | 1.021371             | Putative oxidoreductase yhhX OS=Escherichia coli O6 GN=yhhX                     |
| P0A6P9     | eno    | 1.022036             | Enolase OS=Escherichia coli O6 GN=eno                                           |
| P05194     | aroD   | 1.022712             | 3-dehydroquinate dehydratase OS=Escherichia coli O6 GN=aroD                     |
| P67910     | hldD   | 1.02317              | ADP-L-glycero-D-manno-heptose-6-epimerase OS=Escherichia coli O6 GN=hldD        |
| P30863     | yafB   | 1.024608             | 2,5-diketo-D-gluconic acid reductase B OS=Escherichia coli O6 GN=yafB           |
| P0A9A9     | fur    | 1.024614             | Ferric uptake regulation protein OS=Escherichia coli O6 GN=fur                  |
| W82P03     | ygiF   | 1.025591             | Putative uncharacterized protein ygiF OS=Escherichia coli O6 GN=ygiF            |
| P13024     | fdhE   | 1.026033             | Protein fdhE OS=Escherichia coli O6 GN=fdhE                                     |
| P21599     | pykA   | 1.026892             | Pyruvate kinase II OS=Escherichia coli O6 GN=pykA                               |
| P21338     | rna    | 1.026926             | Ribonuclease I OS=Escherichia coli O6 GN=rna                                    |
| P08395     | sppA   | 1.027265             | Protease IV OS=Escherichia coli O6 GN=sppA                                      |
| P64596     | yraP   | 1.027496             | Uncharacterized protein yraP OS=Escherichia coli O6 GN=yraP                     |
| A0A0H2V851 | c2236  | 1.029304             | Transcriptional regulator kdgR OS=Escherichia coli O6 GN=c2236                  |
| P0A8C1     | ybjQ   | 1.030667             | UPF0145 protein ybjQ OS=Escherichia coli O6 GN=ybjQ                             |
| P0ACC7     | glmU   | 1.031011             | Bifunctional protein glmU OS=Escherichia coli O6 GN=glmU                        |
| P0A7N9     | rpmG   | 1.031347             | 50S ribosomal protein L33 OS=Escherichia coli O6 GN=rpmG                        |
| P0A7M2     | rpmB   | 1.032219             | 50S ribosomal protein L28 OS=Escherichia coli O6 GN=rpmB                        |
| P36767     | rdgC   | 1.032622             | Recombination-associated protein rdgC OS=Escherichia coli O6 GN=rdgC            |
| P08394     | recB   | 1.032864             | RecBCD enzyme subunit RecB OS=Escherichia coli O6 GN=recB                       |
| P0AEP3     | galU   | 1.032924             | UTP--glucose-1-phosphate uridylyltransferase OS=Escherichia coli O6 GN=galU     |
| P0A7T3     | rpsP   | 1.033175             | 30S ribosomal protein S16 OS=Escherichia coli O6 GN=rpsP                        |
| P0AB52     | yehN   | 1.033363             | Putative uncharacterized protein yehN OS=Escherichia coli O6 GN=yehN            |

| Uniprot ID | Symbol | TMT ratio (high/low) | Protein description                                                                                                                                |
|------------|--------|----------------------|----------------------------------------------------------------------------------------------------------------------------------------------------|
| P17443     | murG   | 1.033831             | UDP-N-acetylglucosamine--N-acetylmuramyl-(pentapeptide) pyrophosphoryl-undecaprenol N-acetylglucosamine transferase OS=Escherichia coli O6 GN=murG |
| P0AG82     | pstS   | 1.034186             | Phosphate-binding periplasmic protein OS=Escherichia coli O6 GN=pstS                                                                               |
| P0AGA2     | secY   | 1.035125             | Preprotein translocase subunit secY OS=Escherichia coli O6 GN=secY                                                                                 |
| P0AGG0     | thiL   | 1.036655             | Thiamine-monophosphate kinase OS=Escherichia coli O6 GN=thiL                                                                                       |
| P30147     | gip    | 1.037622             | Hydroxypyruvate isomerase OS=Escherichia coli O6 GN=gip                                                                                            |
| A0A0H2V9W2 | c2059  | 1.037638             | Protein ydhR OS=Escherichia coli O6 GN=c2059                                                                                                       |
| P0A8V2     | rpoB   | 1.038204             | DNA-directed RNA polymerase subunit beta OS=Escherichia coli O6 GN=rpoB                                                                            |
| P0AFX9     | rseB   | 1.038478             | Sigma-E factor Regulatory protein rseB OS=Escherichia coli O6 GN=rseB                                                                              |
| P00962     | glnS   | 1.039784             | Glutaminyl-tRNA synthetase OS=Escherichia coli O6 GN=glnS                                                                                          |
| P60438     | rplC   | 1.04011              | 50S ribosomal protein L3 OS=Escherichia coli O6 GN=rplC                                                                                            |
| P07395     | pheT   | 1.04108              | Phenylalanyl-tRNA synthetase beta chain OS=Escherichia coli O6 GN=pheT                                                                             |
| P37665     | viaD   | 1.041735             | Hypothetical lipoprotein viaD OS=Escherichia coli O6 GN=viaD                                                                                       |
| P37051     | purU   | 1.041763             | Formyltetrahydrofolate deformylase OS=Escherichia coli O6 GN=purU                                                                                  |
| P0A891     | aroG   | 1.04224              | Phospho-2-dehydro-3-deoxyheptonate aldolase OS=Escherichia coli O6 GN=aroG                                                                         |
| P0A738     | moaC   | 1.042307             | Molybdenum cofactor biosynthesis protein C OS=Escherichia coli O6 GN=moaC                                                                          |
| P60624     | rplX   | 1.042644             | 50S ribosomal protein L24 OS=Escherichia coli O6 GN=rplX                                                                                           |
| P02358     | rpsF   | 1.044547             | 30S ribosomal protein S6 OS=Escherichia coli O6 GN=rpsF                                                                                            |
| P0A6I6     | coaD   | 1.044693             | hosphopantetheine adenyltransferase OS=Escherichia coli O6 GN=coaD                                                                                 |
| P0AEG4     | dsbA   | 1.044778             | Thiol:disulfide interchange protein DsbA OS=Escherichia coli O6 GN=dsbA                                                                            |
| P39411     | yjjX   | 1.044846             | UPF0244 protein yjjX OS=Escherichia coli O6 GN=yjjX                                                                                                |
| P00961     | glyS   | 1.04491              | Glycyl-tRNA synthetase beta subunit OS=Escherichia coli O6 GN=glyS                                                                                 |
| P40874     | solA   | 1.045326             | N-methyl-L-tryptophan oxidase OS=Escherichia coli O6 GN=solA                                                                                       |
| P0ADR8     | ygdH   | 1.046533             | LOG family protein ygdH OS=Escherichia coli O6 GN=ygdH                                                                                             |
| P45578     | luxS   | 1.046935             | S-ribosylhomocysteine lyase OS=Escherichia coli O6 GN=luxS                                                                                         |
| W8ZXI3     | yrbD   | 1.04724              | Putative uncharacterized protein yrbD OS=Escherichia coli O6 GN=yrbD                                                                               |
| P0A8F4     | udk    | 1.047392             | Uridine kinase OS=Escherichia coli O6 GN=udk                                                                                                       |
| P0A9L3     | fkIB   | 1.04798              | FKBP-type 22 kDa peptidyl-prolyl cis-trans isomerase OS=Escherichia coli O6 GN=fkIB                                                                |
| A0A0H2V8E0 | c2429  | 1.048265             | Putative uncharacterized protein OS=Escherichia coli O6 GN=c2429                                                                                   |

| Uniprot ID | Symbol | TMT ratio (high/low) | Protein description                                                                           |
|------------|--------|----------------------|-----------------------------------------------------------------------------------------------|
| P38038     | cysJ   | 1.048593             | Sulfite reductase [NADPH] flavoprotein alpha-component OS=Escherichia coli O6 GN=cysJ         |
| P0AC69     | grxD   | 1.048671             | Glutaredoxin-4 OS=Escherichia coli O6 GN=grxD                                                 |
| P0A817     | metK   | 1.049621             | S-adenosylmethionine synthase OS=Escherichia coli O6 GN=metK                                  |
| P77690     | arnB   | 1.049685             | UDP-4-amino-4-deoxy-L-arabinose--oxoglutarate aminotransferase OS=Escherichia coli O6 GN=arnB |
| P04425     | gshB   | 1.049705             | Glutathione synthetase OS=Escherichia coli O6 GN=gshB                                         |
| P07363     | cheA   | 1.049767             | Chemotaxis protein CheA OS=Escherichia coli O6 GN=cheA                                        |
| P0A6L0     | deoC   | 1.050971             | Deoxyribose-phosphate aldolase OS=Escherichia coli O6 GN=deoC                                 |
| Q8FKW2     | c0279  | 1.051066             | UPF0401 protein c0279 OS=Escherichia coli O6 GN=c0279                                         |
| P0AAB4     | ubiD   | 1.051195             | 3-octaprenyl-4-hydroxybenzoate carboxy-lyase OS=Escherichia coli O6 GN=ubiD                   |
| A0A0H2V8B3 | c2426  | 1.051447             | Putative peptide synthetase OS=Escherichia coli O6 GN=c2426                                   |
| A0A0H2V9L8 | c3143  | 1.051549             | Putative uncharacterized protein OS=Escherichia coli O6 GN=c3143                              |
| A0A0H2V572 | c0719  | 1.053788             | Putative uncharacterized protein OS=Escherichia coli O6 GN=c0719                              |
| P0A8T1     | prmA   | 1.055215             | Ribosomal protein L11 methyltransferase OS=Escherichia coli O6 GN=prmA                        |
| A0A0H2V615 | c1236  | 1.056102             | Putative uncharacterized protein OS=Escherichia coli O6 GN=c1236                              |
| P75726     | citF   | 1.056185             | Citrate lyase alpha chain OS=Escherichia coli O6 GN=citF                                      |
| P37188     | gatB   | 1.058128             | Galactitol-specific phosphotransferase enzyme IIB component OS=Escherichia coli O6 GN=gatB    |
| P76423     | thiM   | 1.058314             | Hydroxyethylthiazole kinase OS=Escherichia coli O6 GN=thiM                                    |
| P0CE47     | tufA   | 1.0588               | Elongation factor Tu OS=Escherichia coli O6 GN=tufA                                           |
| P0A8E5     | yacl   | 1.059336             | UPF0231 protein yacl OS=Escherichia coli O6 GN=yacl                                           |
| P0ACC3     | erpA   | 1.059463             | Iron-sulfur cluster insertion protein erpA OS=Escherichia coli O6 GN=erpA                     |
| P0AB89     | purB   | 1.059559             | Adenylosuccinate lyase OS=Escherichia coli O6 GN=purB                                         |
| P0A862     | tpx    | 1.059629             | Thiol peroxidase OS=Escherichia coli O6 GN=tpx                                                |
| P77806     | ybdL   | 1.060194             | Hypothetical aminotransferase ybdL OS=Escherichia coli O6 GN=ybdL                             |
| P0ACF8     | hns    | 1.06043              | DNA-binding protein H-NS OS=Escherichia coli O6 GN=hns                                        |
| P0AG55     | rplF   | 1.060962             | 50S ribosomal protein L6 OS=Escherichia coli O6 GN=rplF                                       |
| W8ZFB1     | ybiK   | 1.061754             | Putative L-asparaginase OS=Escherichia coli O6 GN=ybiK                                        |
| P31828     | pqqL   | 1.062115             | Probable zinc protease pqqL OS=Escherichia coli O6 GN=pqqL                                    |
| P69913     | csrA   | 1.062781             | Carbon storage regulator OS=Escherichia coli O6 GN=csrA                                       |
| W8ZNS8     | ybgI   | 1.06447              | UPF0135 protein ybgI OS=Escherichia coli O6 GN=ybgI                                           |

| Uniprot ID | Symbol | TMT ratio (high/low) | Protein description                                                               |
|------------|--------|----------------------|-----------------------------------------------------------------------------------|
| W8ZP39     | ybiP   | 1.064792             | Putative uncharacterized protein ybiP OS=Escherichia coli O6 GN=ybiP              |
| P0A7I4     | prfC   | 1.065258             | Peptide chain release factor 3 OS=Escherichia coli O6 GN=prfC                     |
| Q46822     | idi    | 1.065561             | Isopentenyl-diphosphate Delta-isomerase OS=Escherichia coli O6 GN=idi             |
| P0A7I5     | kdsA   | 1.065768             | 2-dehydro-3-deoxyphosphooctonate aldolase OS=Escherichia coli O6 GN=kdsA          |
| P75863     | ycbX   | 1.065866             | Putative uncharacterized protein ycbX OS=Escherichia coli O6 GN=ycbX              |
| P0A8M0     | asnS   | 1.065981             | Asparaginyl-tRNA synthetase OS=Escherichia coli O6 GN=asnS                        |
| P27838     | cyaY   | 1.066646             | Protein CyaY OS=Escherichia coli O6 GN=cyaY                                       |
| P75745     | ybgK   | 1.066665             | Putative uncharacterized protein ybgK OS=Escherichia coli O6 GN=ybgK              |
| P68919     | rplY   | 1.066972             | 50S ribosomal protein L25 OS=Escherichia coli O6 GN=rplY                          |
|            | rpsJ   | 1.068099             | 30S ribosomal protein S10 OS=Escherichia coli O6 GN=rpsJ                          |
| P22259     | pckA   | 1.068528             | Phosphoenolpyruvate carboxykinase [ATP] OS=Escherichia coli O6 GN=pckA            |
| P33359     | yehW   | 1.068725             | Hypothetical ABC transporter permease protein yehW OS=Escherichia coli O6 GN=yehW |
| P11875     | argS   | 1.069213             | Arginyl-tRNA synthetase OS=Escherichia coli O6 GN=argS                            |
| P0AGI8     | trkA   | 1.070045             | Trk system potassium uptake protein trkA OS=Escherichia coli O6 GN=trkA           |
| P39325     | ytfQ   | 1.070552             | ABC transporter Periplasmic binding protein ytfQ OS=Escherichia coli O6 GN=ytfQ   |
| W9ALF0     | yhhM   | 1.070663             | Putative uncharacterized protein yhhM OS=Escherichia coli O6 GN=yhhM              |
| P00956     | ileS   | 1.072313             | Isoleucyl-tRNA synthetase OS=Escherichia coli O6 GN=ileS                          |
| P0A8W0     | nanR   | 1.073396             | Transcriptional regulator nanR OS=Escherichia coli O6 GN=nanR                     |
| P10378     | entE   | 1.073636             | Enterobactin synthetase component E OS=Escherichia coli O6 GN=entE                |
| P23869     | ppiB   | 1.074067             | Peptidyl-prolyl cis-trans isomerase B OS=Escherichia coli O6 GN=ppiB              |
| P0A6F3     | glpK   | 1.074904             | Glycerol kinase OS=Escherichia coli O6 GN=glpK                                    |
| P0ADY7     | rplP   | 1.075982             | 50S ribosomal protein L16 OS=Escherichia coli O6 GN=rplP                          |
| P0A8R0     | rraA   | 1.076421             | Regulator of ribonuclease activity A OS=Escherichia coli O6 GN=rraA               |
| P37652     | yhjN   | 1.076549             | Cyclic di-GMP binding protein OS=Escherichia coli O6 GN=yhjN                      |
| P77570     | anmK   | 1.07656              | Anhydro-N-acetylmuramic acid kinase OS=Escherichia coli O6 GN=anmK                |
| W8ZXV8     | yhiD   | 1.076794             | Putative uncharacterized protein yhiD OS=Escherichia coli O6 GN=yhiD              |
| P77581     | astC   | 1.078005             | Succinylornithine transaminase OS=Escherichia coli O6 GN=astC                     |
| P75777     | ybhG   | 1.078174             | UPF0194 membrane protein ybhG OS=Escherichia coli O6 GN=ybhG                      |
| P0AAC0     | uspE   | 1.078219             | Universal stress protein E OS=Escherichia coli O6 GN=uspE                         |

| Uniprot ID | Symbol | TMT ratio (high/low) | Protein description                                                                    |
|------------|--------|----------------------|----------------------------------------------------------------------------------------|
| P0A8J8     | rhIB   | 1.078666             | ATP-dependent RNA helicase rhIB OS=Escherichia coli O6 GN=rhIB                         |
| P26616     | maeA   | 1.079274             | NAD-dependent malic enzyme OS=Escherichia coli O6 GN=maeA                              |
| P0A6P1     | tsf    | 1.079572             | Elongation factor Ts OS=Escherichia coli O6 GN=tsf                                     |
| P0A794     | pdxJ   | 1.080652             | Pyridoxine 5&#039;-phosphate synthase OS=Escherichia coli O6 GN=pdxJ                   |
| P0AG07     | rpe    | 1.080952             | Ribulose-phosphate 3-epimerase OS=Escherichia coli O6 GN=rpe                           |
| C3SLK2     | oxaA   | 1.081851             | Inner membrane protein oxaA OS=Escherichia coli O6 GN=oxaA                             |
| P0A8K5     | yaeP   | 1.081936             | UPF0253 protein YaeP OS=Escherichia coli O6 GN=yaeP                                    |
| W8ZG87     | ybiC   | 1.082376             | Hypothetical oxidoreductase ybiC OS=Escherichia coli O6 GN=ybiC                        |
| P63224     | gmhA   | 1.082456             | Phosphoheptose isomerase OS=Escherichia coli O6 GN=gmhA                                |
| A0A0H2V833 | c1187  | 1.082744             | 3-oxoacyl-[acyl-carrier protein] reductase OS=Escherichia coli O6 GN=c1187             |
| P0A7H6     | recR   | 1.084068             | Recombination protein recR OS=Escherichia coli O6 GN=recR                              |
| P0A825     | glyA   | 1.084298             | Serine hydroxymethyltransferase OS=Escherichia coli O6 GN=glyA                         |
| P0AE06     | acrA   | 1.084587             | Acriflavine resistance protein A OS=Escherichia coli O6 GN=acrA                        |
| P39172     | yebL   | 1.084718             | High-affinity zinc uptake system protein znuA OS=Escherichia coli O6 GN=yebL           |
| P33643     | rluD   | 1.084925             | Ribosomal large subunit pseudouridine synthase D OS=Escherichia coli O6 GN=rluD        |
| P0AFF6     | nusA   | 1.085855             | Transcription elongation protein nusA OS=Escherichia coli O6 GN=nusA                   |
| W8ZS03     | infC   | 1.086249             | Translation initiation factor IF-3 OS=Escherichia coli O6 GN=infC                      |
| P77674     | prrr   | 1.086311             | Gamma-aminobutyraldehyde dehydrogenase OS=Escherichia coli O6 GN=prrr                  |
| P0AFR4     | yciO   | 1.086363             | Uncharacterized protein yciO OS=Escherichia coli O6 GN=yciO                            |
| W8ZLT0     | ypdB   | 1.086601             | Uncharacterized response regulatory protein ypdB OS=Escherichia coli O6 GN=ypdB        |
| P0A7W1     | rpsE   | 1.08721              | 30S ribosomal protein S5 OS=Escherichia coli O6 GN=rpsE                                |
| P61175     | rplV   | 1.088563             | 50S ribosomal protein L22 OS=Escherichia coli O6 GN=rplV                               |
| P0ADI4     | entB   | 1.088849             | Isochorismatase OS=Escherichia coli O6 GN=entB                                         |
| P04128     | fimA   | 1.088853             | Type-1 fimbrial protein, A chain OS=Escherichia coli O6 GN=fimA                        |
| P0A761     | nanE   | 1.089632             | Putative N-acetylmannosamine-6-phosphate 2-epimerase OS=Escherichia coli O6 GN=nanE    |
| P30011     | nadC   | 1.090122             | Nicotinate-nucleotide pyrophosphorylase (Carboxylating) OS=Escherichia coli O6 GN=nadC |
| P77398     | arnA   | 1.090493             | Bifunctional polymyxin resistance protein ArnA OS=Escherichia coli O6 GN=arnA          |
| W8ZRB2     | hemX   | 1.092957             | Putative uroporphyrin-III C-methyltransferase OS=Escherichia coli O6 GN=hemX           |
|            | hemE   | 1.093113             | Uroporphyrinogen decarboxylase OS=Escherichia coli O6 GN=hemE                          |

| Uniprot ID | Symbol | TMT ratio (high/low) | Protein description                                                                     |
|------------|--------|----------------------|-----------------------------------------------------------------------------------------|
| P05459     | pdxB   | 1.093956             | Erythronate-4-phosphate dehydrogenase OS=Escherichia coli O6 GN=pdxB                    |
| P62768     | yaeH   | 1.094182             | UPF0325 protein yaeH OS=Escherichia coli O6 GN=yaeH                                     |
| P0ACY1     | ydjA   | 1.094292             | Protein ydjA OS=Escherichia coli O6 GN=ydjA                                             |
| P0AC33     | fumA   | 1.095063             | Fumarate hydratase class I, aerobic OS=Escherichia coli O6 GN=fumA                      |
| P22255     | cysQ   | 1.095153             | bisphosphate nucleotidase CysQ OS=Escherichia coli O6 GN=cysQ                           |
| P0AF93     | yjgF   | 1.095426             | RutC family protein yjgF OS=Escherichia coli O6 GN=yjgF                                 |
| P67603     | yqfB   | 1.095504             | UPF0267 protein yqfB OS=Escherichia coli O6 GN=yqfB                                     |
| P0A6D3     | aroA   | 1.095866             | 3-phosphoshikimate 1-carboxyvinyltransferase OS=Escherichia coli O6 GN=aroA             |
| P0AG63     | rpsQ   | 1.096361             | 30S ribosomal protein S17 OS=Escherichia coli O6 GN=rpsQ                                |
| P37903     | uspF   | 1.09639              | Universal stress protein F OS=Escherichia coli O6 GN=uspF                               |
| P0A6W9     | gshA   | 1.096569             | Glutamate--cysteine ligase OS=Escherichia coli O6 GN=gshA                               |
| P0A7U7     | rpsT   | 1.096679             | 30S ribosomal protein S20 OS=Escherichia coli O6 GN=rpsT                                |
| P0A6F1     | carA   | 1.097403             | Carbamoyl-phosphate synthase small chain OS=Escherichia coli O6 GN=carA                 |
| P77309     | yneJ   | 1.097415             | Hypothetical transcriptional regulator yneJ OS=Escherichia coli O6 GN=yneJ              |
| P39274     | yjdJ   | 1.098526             | Putative uncharacterized protein yjdJ OS=Escherichia coli O6 GN=yjdJ                    |
| P0A7I7     | ribA   | 1.098539             | GTP cyclohydrolase-2 OS=Escherichia coli O6 GN=ribA                                     |
| P09394     | glpQ   | 1.099142             | Glycerophosphoryl diester phosphodiesterase, periplasmic OS=Escherichia coli O6 GN=glpQ |
| P0ADP9     | yihD   | 1.099772             | Protein YihD OS=Escherichia coli O6 GN=yihD                                             |
| P04995     | sbcB   | 1.100482             | Exodeoxyribonuclease I OS=Escherichia coli O6 GN=sbcB                                   |
| P06983     | hemC   | 1.100783             | Porphobilinogen deaminase OS=Escherichia coli O6 GN=hemC                                |
| P15877     | gcd    | 1.101268             | Glucose dehydrogenase OS=Escherichia coli O6 GN=gcd                                     |
| P0A8I3     | yaaA   | 1.101879             | UPF0246 protein yaaA OS=Escherichia coli O6 GN=yaaA                                     |
| P0A959     | yfbQ   | 1.102828             | Uncharacterized aminotransferase YfbQ OS=Escherichia coli O6 GN=yfbQ                    |
| P06987     | hisB   | 1.103002             | Histidine biosynthesis bifunctional protein hisB OS=Escherichia coli O6 GN=hisB         |
| P0ABF6     | cdd    | 1.103053             | Cytidine deaminase OS=Escherichia coli O6 GN=cdd                                        |
| P0ADF8     | ilvN   | 1.103363             | Acetolactate synthase isozyme 1 small subunit OS=Escherichia coli O6 GN=ilvN            |
| P07604     | tyrR   | 1.104144             | Transcriptional Regulatory protein tyrR OS=Escherichia coli O6 GN=tyrR                  |
| P77211     | cusC   | 1.105049             | Cation efflux system protein CusC OS=Escherichia coli O6 GN=cusC                        |
| P35340     | ahpF   | 1.105074             | Alkyl hydroperoxide reductase subunit F OS=Escherichia coli O6 GN=ahpF                  |

| Uniprot ID | Symbol | TMT ratio (high/low) | Protein description                                                          |
|------------|--------|----------------------|------------------------------------------------------------------------------|
| P05852     | ygjD   | 1.105206             | Uncharacterized protein yqjD OS=Escherichia coli O6 GN=yqjD                  |
| P03024     | galR   | 1.105312             | Galactose operon repressor OS=Escherichia coli O6 GN=galR                    |
| P75800     | yliE   | 1.108933             | Probable cyclic di-GMP phosphodiesterase PdeI OS=Escherichia coli O6 GN=yliE |
| P12281     | moeA   | 1.110251             | Molybdopterin biosynthesis protein moeA OS=Escherichia coli O6 GN=moeA       |
| P76177     | ydgH   | 1.110875             | Protein ydgH OS=Escherichia coli O6 GN=ydgH                                  |
| Q06902     | pepA   | 1.1113               | Cytosol aminopeptidase OS=Escherichia coli O6 GN=pepA                        |
| P0A7B5     | proB   | 1.111713             | Glutamate 5-kinase OS=Escherichia coli O6 GN=proB                            |
| P24232     | hmp    | 1.112264             | Flavohemoprotein OS=Escherichia coli O6 GN=hmp                               |
| P30136     | thiC   | 1.112511             | Phosphomethylpyrimidine synthase OS=Escherichia coli O6 GN=thiC              |
| P0AA04     | ptsH   | 1.112659             | Phosphocarrier protein HPr OS=Escherichia coli O6 GN=ptsH                    |
| P69441     | adk    | 1.112747             | Adenylate kinase OS=Escherichia coli O6 GN=adk                               |
| P0A998     | ftnA   | 1.11423              | Ferritin-1 OS=Escherichia coli O6 GN=ftnA                                    |
| P0AES4     | gyrA   | 1.114238             | DNA gyrase subunit A OS=Escherichia coli O6 GN=gyrA                          |
| P10408     | secA   | 1.114365             | Protein translocase subunit secA OS=Escherichia coli O6 GN=secA              |
| W9AKJ9     | yhbW   | 1.11509              | Uncharacterized protein yhbW OS=Escherichia coli O6 GN=yhbW                  |
| P0AB55     | ycil   | 1.11588              | Protein Ycil OS=Escherichia coli O6 GN=ycil                                  |
| P0A6V1     | glgC   | 1.116047             | Glucose-1-phosphate adenyltransferase OS=Escherichia coli O6 GN=glgC         |
| P60340     | truB   | 1.116356             | tRNA pseudouridine synthase B OS=Escherichia coli O6 GN=truB                 |
| P77775     | yfcH   | 1.116978             | Putative uncharacterized protein yfcH OS=Escherichia coli O6 GN=yfcH         |
| P23839     | yicC   | 1.117005             | Protein yicC OS=Escherichia coli O6 GN=yicC                                  |
| P0A7W7     | rpsH   | 1.117131             | 30S ribosomal protein S8 OS=Escherichia coli O6 GN=rpsH                      |
| P0ADG7     | guaB   | 1.117774             | Inosine-monophosphate dehydrogenase OS=Escherichia coli O6 GN=guaB           |
| P0A763     | ndk    | 1.117834             | Nucleoside diphosphate kinase OS=Escherichia coli O6 GN=ndk                  |
| P02919     | mrcB   | 1.118215             | Penicillin-binding protein 1B OS=Escherichia coli O6 GN=mrcB                 |
| P0C0V0     | htrA   | 1.118292             | Protease do OS=Escherichia coli O6 GN=htrA                                   |
| P60723     | rplD   | 1.120333             | 50S ribosomal protein L4 OS=Escherichia coli O6 GN=rplD                      |
| P0AF90     | yjgD   | 1.120366             | Regulator of ribonuclease activity B OS=Escherichia coli O6 GN=yjgD          |
| A0A0H2VDQ9 | c4509  | 1.121019             | Uncharacterized protein OS=Escherichia coli O6 GN=c4509                      |
| P0ABJ9     | cydA   | 1.121611             | Cytochrome d ubiquinol oxidase subunit 1 OS=Escherichia coli O6 GN=cydA      |



| Uniprot ID | Symbol | TMT ratio<br>(high/low) | Protein description                                                                        |
|------------|--------|-------------------------|--------------------------------------------------------------------------------------------|
| P0AED7     | dapE   | 1.121888                | Succinyl-diaminopimelate desuccinylase OS=Escherichia coli O6 GN=dapE                      |
| P0AE37     | astA   | 1.122658                | Arginine N-succinyltransferase OS=Escherichia coli O6 GN=astA                              |
| P0C018     | rpIR   | 1.122888                | 50S ribosomal protein L18 OS=Escherichia coli O6 GN=rpIR                                   |
| P0A8L1     | serS   | 1.123384                | Seryl-tRNA synthetase OS=Escherichia coli O6 GN=serS                                       |
| P76196     | ydil   | 1.124408                | Uncharacterized protein YdiL OS=Escherichia coli O6 GN=ydiL                                |
| P18956     | ggf    | 1.124709                | Gamma-glutamyltranspeptidase OS=Escherichia coli O6 GN=ggf                                 |
| P0A6N4     | efp    | 1.124754                | Elongation factor P OS=Escherichia coli O6 GN=efp                                          |
| P0ACL2     | exuR   | 1.125229                | Exu regulon transcriptional regulator OS=Escherichia coli O6 GN=exuR                       |
| P0A6P5     | era    | 1.126303                | GTPase Era OS=Escherichia coli O6 GN=era                                                   |
| A0A0H2V703 | c1764  | 1.126994                | Efflux pump membrane transporter OS=Escherichia coli O6 GN=c1764                           |
| P0AEZ9     | moaB   | 1.127976                | Molybdenum cofactor biosynthesis protein B OS=Escherichia coli O6 GN=moaB                  |
| P04152     | umuC   | 1.129749                | UmuC protein OS=Escherichia coli O6 GN=umuC                                                |
| P32669     | fsaB   | 1.130068                | Fructose-6-phosphate aldolase 2 OS=Escherichia coli O6 GN=fsaB                             |
| P77215     | rhmD   | 1.130189                | L-rhamnonate dehydratase OS=Escherichia coli O6 GN=rhmD                                    |
| P00350     | gnd    | 1.130491                | 6-phosphogluconate dehydrogenase, decarboxylating OS=Escherichia coli O6 GN=gnd            |
| P33018     | yeiG   | 1.1305                  | S-formylglutathione hydrolase yeiG OS=Escherichia coli O6 GN=yeiG                          |
|            | dnaN   | 1.13099                 | DNA polymerase III subunit beta OS=Escherichia coli O6 GN=dnaN                             |
| P27302     | tktA   | 1.131936                | Transketolase 1 OS=Escherichia coli O6 GN=tktA                                             |
| P15977     | malQ   | 1.132076                | 4-alpha-glucanotransferase OS=Escherichia coli O6 GN=malQ                                  |
| P08312     | pheS   | 1.132501                | Phenylalanyl-tRNA synthetase alpha chain OS=Escherichia coli O6 GN=pheS                    |
| P0AEM0     | fkpB   | 1.134328                | FKBP-type 16 kDa peptidyl-prolyl cis-trans isomerase OS=Escherichia coli O6 GN=fkpB        |
| P00959     | metG   | 1.134364                | Methionyl-tRNA synthetase OS=Escherichia coli O6 GN=metG                                   |
| P76290     | cmoA   | 1.13467                 | tRNA (cmo5U34)-methyltransferase OS=Escherichia coli O6 GN=cmoA                            |
| P68679     | rpsU   | 1.134843                | 30S ribosomal protein S21 OS=Escherichia coli O6 GN=rpsU                                   |
| W8ZG19     | tolB   | 1.135853                | Protein tolB OS=Escherichia coli O6 GN=tolB                                                |
| P0A991     | fbaB   | 1.137699                | Fructose-bisphosphate aldolase class 1 OS=Escherichia coli O6 GN=fbaB                      |
| P39831     | ydfG   | 1.138356                | NADP-dependent L-serine/L-allo-threonine dehydrogenase ydfG OS=Escherichia coli O6 GN=ydfG |
| A0A0H2V6P0 | c1102  | 1.138976                | Protein yccU OS=Escherichia coli O6 GN=c1102                                               |
| P00448     | sodA   | 1.139105                | Superoxide dismutase [Mn] OS=Escherichia coli O6 GN=sodA                                   |

| Uniprot ID | Symbol | TMT ratio<br>(high/low) | Protein description                                                                 |
|------------|--------|-------------------------|-------------------------------------------------------------------------------------|
| W9AII4     | yfgM   | 1.139441                | Putative uncharacterized protein yfgM OS=Escherichia coli O6 GN=yfgM                |
| P0AEY5     | mdaB   | 1.13949                 | Modulator of drug activity B OS=Escherichia coli O6 GN=mdaB                         |
| P0A6Q3     | fabA   | 1.140044                | 3-hydroxydecanoyl-[acyl-carrier-protein] dehydratase OS=Escherichia coli O6 GN=fabA |
| P11447     | argH   | 1.14052                 | Argininosuccinate lyase OS=Escherichia coli O6 GN=argH                              |
| P0AAI9     | fabD   | 1.140805                | Malonyl CoA-acyl carrier protein transacylase OS=Escherichia coli O6 GN=fabD        |
| W8ZWX3     | yhbL   | 1.141907                | Enhancing lycopene biosynthesis protein 2 OS=Escherichia coli O6 GN=yhbL            |
| P0A717     | prs    | 1.142131                | Ribose-phosphate pyrophosphokinase OS=Escherichia coli O6 GN=prs                    |
| P0A6B7     | iscS   | 1.142489                | Cysteine desulfurase OS=Escherichia coli O6 GN=iscS                                 |
| P25736     | endA   | 1.142936                | Endonuclease I OS=Escherichia coli O6 GN=endA                                       |
| P0AE08     | ahpC   | 1.142982                | Alkyl hydroperoxide reductase subunit C OS=Escherichia coli O6 GN=ahpC              |
| P32719     | yjcU   | 1.143309                | D-allulose-6-phosphate 3-epimerase OS=Escherichia coli O6 GN=yjcU                   |
| P55135     | rumA   | 1.143374                | 23S rRNA (uracil-5-)-methyltransferase Ruma OS=Escherichia coli O6 GN=rumA          |
| P0A6U8     | glgA   | 1.14419                 | Glycogen synthase OS=Escherichia coli O6 GN=glgA                                    |
| P33602     | nuoG   | 1.144719                | NADH-quinone oxidoreductase subunit G OS=Escherichia coli O6 GN=nuoG                |
| P23836     | phoP   | 1.145272                | Transcriptional regulatory protein phoP OS=Escherichia coli O6 GN=phoP              |
| P0A786     | pyrB   | 1.145314                | Aspartate carbamoyltransferase catalytic chain OS=Escherichia coli O6 GN=pyrB       |
| P0A796     | pfkA   | 1.14593                 | 6-phosphofructokinase OS=Escherichia coli O6 GN=pfkA                                |
| P0A929     | yrdA   | 1.146146                | Protein yrdA OS=Escherichia coli O6 GN=yrdA                                         |
| P0AGG0     | thiL   | 1.146351                | Thiamine-monophosphate kinase OS=Escherichia coli O6 GN=thiL                        |
| P0ADX1     | yhfA   | 1.146737                | Protein yhfA OS=Escherichia coli O6 GN=yhfA                                         |
| Q57261     | truD   | 1.146835                | tRNA pseudouridine synthase D OS=Escherichia coli O6 GN=truD                        |
| A0A0H2V8T3 | c2669  | 1.14696                 | Putative uncharacterized protein OS=Escherichia coli O6 GN=c2669                    |
| P0A6K3     | def    | 1.147634                | Peptide deformylase OS=Escherichia coli O6 GN=def                                   |
| P0A7R9     | rpsK   | 1.149278                | 30S ribosomal protein S11 OS=Escherichia coli O6 GN=rpsK                            |
| P29208     | menC   | 1.149376                | o-succinylbenzoate synthase OS=Escherichia coli O6 GN=menC                          |
| P0A850     | tig    | 1.149662                | Trigger factor OS=Escherichia coli O6 GN=tig                                        |
| P16095     | sdaA   | 1.150126                | L-serine dehydratase 1 OS=Escherichia coli O6 GN=sdaA                               |
| P27298     | prlC   | 1.15051                 | Oligopeptidase A OS=Escherichia coli O6 GN=prlC                                     |

| Uniprot ID | Symbol | TMT ratio (high/low) | Protein description                                                              |
|------------|--------|----------------------|----------------------------------------------------------------------------------|
| P0A7T7     | rpsR   | 1.151487             | 30S ribosomal protein S18 OS=Escherichia coli O6 GN=rpsR                         |
| P64423     | zntB   | 1.15178              | Zinc transport protein ZntB OS=Escherichia coli O6 GN=zntB                       |
| P0A9X4     | mreB   | 1.15197              | Rod shape-determining protein mreB OS=Escherichia coli O6 GN=mreB                |
| P0ACJ0     | lrp    | 1.15294              | Leucine-responsive regulatory protein OS=Escherichia coli O6 GN=lrp              |
| P09099     | xylB   | 1.153143             | Xylulose kinase OS=Escherichia coli O6 GN=xylB                                   |
| P0AG86     | secB   | 1.154735             | Protein-export protein secB OS=Escherichia coli O6 GN=secB                       |
| A0A0H2V889 | c2318  | 1.155308             | Putative uncharacterized protein OS=Escherichia coli O6 GN=c2318                 |
| P0A955     | gldA   | 1.156055             | Glycerol dehydrogenase OS=Escherichia coli O6 GN=gldA                            |
| P31435     | yicJ   | 1.157609             | Hypothetical symporter yicJ OS=Escherichia coli O6 GN=yicJ                       |
| A0A0H2V818 | c2422  | 1.157827             | Putative inner membrane ABC-transporter OS=Escherichia coli O6 GN=c2422          |
| P24238     | yebB   | 1.157932             | Uncharacterized protein YebB OS=Escherichia coli O6 GN=yebB                      |
| P41409     | rihA   | 1.158274             | Pyrimidine-specific ribonucleoside hydrolase rihA OS=Escherichia coli O6 GN=rihA |
| P15034     | pepP   | 1.158573             | Xaa-Pro aminopeptidase OS=Escherichia coli O6 GN=pepP                            |
| P0ACA7     | yliJ   | 1.158819             | Uncharacterized GST-like protein yliJ OS=Escherichia coli O6 GN=yliJ             |
| P0ADK8     | yibL   | 1.159166             | Uncharacterized protein YibL OS=Escherichia coli O6 GN=yibL                      |
| P33920     | yejK   | 1.159236             | Nucleoid-associated protein YejK OS=Escherichia coli O6 GN=yejK                  |
| P21513     | rne    | 1.159379             | Ribonuclease E OS=Escherichia coli O6 GN=rne                                     |
| P0AE18     | map    | 1.160135             | Methionine aminopeptidase OS=Escherichia coli O6 GN=map                          |
| P0ACE0     | hybC   | 1.161246             | Hydrogenase-2 large chain OS=Escherichia coli O6 GN=hybC                         |
| P0ADD8     | yjjQ   | 1.161667             | Putative uncharacterized protein yjjQ OS=Escherichia coli O6 GN=yjjQ             |
| P0A7A7     | plsB   | 1.162488             | Glycerol-3-phosphate acyltransferase OS=Escherichia coli O6 GN=plsB              |
| P25522     | mnmE   | 1.163005             | tRNA modification GTPase mnmE OS=Escherichia coli O6 GN=mnmE                     |
| P27829     | wecC   | 1.163718             | UDP-N-acetyl-D-mannosamine dehydrogenase OS=Escherichia coli O6 GN=wecC          |
| P0A7A5     | pcm    | 1.163887             | Protein-L-isoaspartate O-methyltransferase OS=Escherichia coli O6 GN=pcm         |
| A0A0H2VE33 | c4605  | 1.165339             | Putative uncharacterized protein OS=Escherichia coli O6 GN=c4605                 |
| P0A7X3     | rpsI   | 1.165523             | 30S ribosomal protein S9 OS=Escherichia coli O6 GN=rpsI                          |
| P76403     | yegQ   | 1.165662             | Putative protease yegQ OS=Escherichia coli O6 GN=yegQ                            |
| P23538     | ppsA   | 1.166867             | Phosphoenolpyruvate synthase OS=Escherichia coli O6 GN=ppsA                      |
| P0AFL3     | ppiA   | 1.167872             | Peptidyl-prolyl cis-trans isomerase A OS=Escherichia coli O6 GN=ppiA             |

| Uniprot ID | Symbol | TMT ratio (high/low) | Protein description                                                                                  |
|------------|--------|----------------------|------------------------------------------------------------------------------------------------------|
| P0A6T9     | gcvH   | 1.168323             | Glycine cleavage system H protein OS=Escherichia coli O6 GN=gcvH                                     |
| P07913     | tdh    | 1.169996             | L-threonine 3-dehydrogenase OS=Escherichia coli O6 GN=tdh                                            |
| P0AF18     | nagA   | 1.170052             | N-acetylglucosamine-6-phosphate deacetylase OS=Escherichia coli O6 GN=nagA                           |
| P0A722     | lpxA   | 1.170414             | Acyl-[acyl-carrier-protein]-UDP-N-acetylglucosamine O-acyltransferase OS=Escherichia coli O6 GN=lpxA |
| P0ADQ7     | ygaM   | 1.171468             | Uncharacterized protein ygaM OS=Escherichia coli O6 GN=ygaM                                          |
| P0ACE7     | ycfF   | 1.171494             | Purine nucleoside phosphoramidase OS=Escherichia coli O6 GN=ycfF                                     |
| P0A8S1     | iciA   | 1.17334              | HTH-type transcriptional regulator ArgP OS=Escherichia coli O6 GN=iciA                               |
| P63386     | mIaF   | 1.173459             | Probable phospholipid import ATP-binding protein MlaF OS=Escherichia coli O6 GN=mIaF                 |
| P75797     | gsiB   | 1.174009             | Glutathione-binding protein gsiB OS=Escherichia coli O6 GN=gsiB                                      |
| P24182     | accC   | 1.174015             | Biotin carboxylase OS=Escherichia coli O6 GN=accC                                                    |
| P22634     | murI   | 1.17427              | Glutamate racemase OS=Escherichia coli O6 GN=murI                                                    |
| P61949     | fldA   | 1.176475             | Flavodoxin-1 OS=Escherichia coli O6 GN=fldA                                                          |
| P37666     | ghrB   | 1.177537             | Glyoxylate/hydroxypyruvate reductase B OS=Escherichia coli O6 GN=ghrB                                |
| P31142     | sseA   | 1.177901             | 3-mercaptopyruvate sulfurtransferase OS=Escherichia coli O6 GN=sseA                                  |
| P0AC62     | grxC   | 1.178054             | Glutaredoxin 3 OS=Escherichia coli O6 GN=grxC                                                        |
| P36683     | acnB   | 1.178928             | Aconitate hydratase 2 OS=Escherichia coli O6 GN=acnB                                                 |
| P52645     | ydbH   | 1.179145             | Uncharacterized protein YdbH OS=Escherichia coli O6 GN=ydbH                                          |
| P0A894     | yhbJ   | 1.179795             | RNase adapter protein RapZ OS=Escherichia coli O6 GN=yhbJ                                            |
| P63417     | yhbS   | 1.180021             | Uncharacterized N-acetyltransferase YhbS OS=Escherichia coli O6 GN=yhbS                              |
| P18335     | argD   | 1.181758             | Acetylornithine/succinyldiaminopimelate aminotransferase OS=Escherichia coli O6 GN=argD              |
| P0ABK5     | cysK   | 1.182222             | Cysteine synthase A OS=Escherichia coli O6 GN=cysK                                                   |
| P37672     | dlgD   | 1.18307              | 2,3-diketo-L-gulonate reductase OS=Escherichia coli O6 GN=dlgD                                       |
| P0A8M3     | thrS   | 1.183955             | Threonyl-tRNA synthetase OS=Escherichia coli O6 GN=thrS                                              |
| P77258     | nemA   | 1.184469             | N-ethylmaleimide reductase OS=Escherichia coli O6 GN=nemA                                            |
| P0AAQ6     | ybaA   | 1.184783             | Uncharacterized protein YbaA OS=Escherichia coli O6 GN=ybaA                                          |
| P0A9Q5     | accD   | 1.184792             | Acetyl-coenzyme A carboxylase carboxyl transferase subunit beta OS=Escherichia coli O6 GN=accD       |
| P0ADF6     | edd    | 1.185886             | Phosphogluconate dehydratase OS=Escherichia coli O6 GN=edd                                           |
| A0A0H2V9I5 | c2973  | 1.186909             | Ethanolamine utilization protein eutL OS=Escherichia coli O6 GN=c2973                                |
| P0ABA4     | atpH   | 1.187175             | ATP synthase subunit delta OS=Escherichia coli O6 GN=atpH                                            |

| Uniprot ID | Symbol | TMT ratio<br>(high/low) | Protein description                                                                                                 |
|------------|--------|-------------------------|---------------------------------------------------------------------------------------------------------------------|
| P0A8Y5     | yidA   | 1.187928                | Phosphatase YidA OS=Escherichia coli O6 GN=yidA                                                                     |
| P00934     | thrC   | 1.187996                | Threonine synthase OS=Escherichia coli O6 GN=thrC                                                                   |
| P23908     | argE   | 1.188715                | Acetylornithine deacetylase OS=Escherichia coli O6 GN=argE                                                          |
| P0A9M8     | pta    | 1.190442                | Phosphate acetyltransferase OS=Escherichia coli O6 GN=pta                                                           |
| W8ZP84     | ybeJ   | 1.190696                | Glutamate/aspartate Periplasmic binding protein OS=Escherichia coli O6 GN=ybeJ                                      |
| P52096     | yaeR   | 1.190842                | Putative uncharacterized protein yaeR OS=Escherichia coli O6 GN=yaeR                                                |
| P05055     | pnp    | 1.191431                | Polyribonucleotide nucleotidyltransferase OS=Escherichia coli O6 GN=pnp                                             |
| P63284     | clpP   | 1.191971                | ATP-dependent Clp protease proteolytic subunit OS=Escherichia coli O6 GN=clpP                                       |
| W8ZYW0     | yicH   | 1.192701                | Putative uncharacterized protein yicH OS=Escherichia coli O6 GN=yicH                                                |
| W8ZLP7     | ygaD   | 1.193633                | Protein YgaD OS=Escherichia coli O6 GN=ygaD                                                                         |
| P04949     | fliC   | 1.193662                | Flagellin OS=Escherichia coli O6 GN=fliC                                                                            |
| P42911     | agaD   | 1.193898                | N-acetylgalactosamine permease IID component OS=Escherichia coli O6 GN=agaD                                         |
| P33599     | nuoC   | 1.194087                | NADH-quinone oxidoreductase subunit C/D OS=Escherichia coli O6 GN=nuoC                                              |
| Q46939     | yqeF   | 1.194413                | Probable acetyl-CoA acetyltransferase OS=Escherichia coli O6 GN=yqeF                                                |
| P07004     | proA   | 1.194579                | Gamma-glutamyl phosphate reductase OS=Escherichia coli O6 GN=proA                                                   |
| A0A0H2V7Y9 | c2225  | 1.194989                | Putative uncharacterized protein OS=Escherichia coli O6 GN=c2225                                                    |
| P77552     | ydhQ   | 1.195271                | Putative uncharacterized protein ydhQ OS=Escherichia coli O6 GN=ydhQ                                                |
| P0A7E5     | pyrG   | 1.198143                | CTP synthase OS=Escherichia coli O6 GN=pyrG                                                                         |
| P11880     | murF   | 1.199559                | UDP-N-acetylmuramoylalanyl-D-glutamyl-2, 6-diaminopimelate--D-alanyl-D-alanyl ligase OS=Escherichia coli O6 GN=murF |
| P0AEX5     | prkB   | 1.199564                | Probable phosphoribulokinase OS=Escherichia coli O6 GN=prkB                                                         |
| P0A7V8     | rpsD   | 1.200204                | 30S ribosomal protein S4 OS=Escherichia coli O6 GN=rpsD                                                             |
| P77374     | ynfE   | 1.20059                 | Putative dimethyl sulfoxide reductase chain ynfE OS=Escherichia coli O6 GN=ynfE                                     |
| Q47679     | yafV   | 1.200676                | Putative uncharacterized protein yafV OS=Escherichia coli O6 GN=yafV                                                |
| P29012     | dadX   | 1.206196                | Alanine racemase, catabolic OS=Escherichia coli O6 GN=dadX                                                          |
| P0AAR3     | ybaK   | 1.207305                | Protein ybaK OS=Escherichia coli O6 GN=ybaK                                                                         |
| P76186     | ydhK   | 1.207768                | Putative uncharacterized protein ydhK OS=Escherichia coli O6 GN=ydhK                                                |
| P23721     | serC   | 1.208949                | Phosphoserine aminotransferase OS=Escherichia coli O6 GN=serC                                                       |
| P64503     | yebV   | 1.210019                | Uncharacterized protein YebV OS=Escherichia coli O6 GN=yebV                                                         |

| Uniprot ID | Symbol | TMT ratio (high/low) | Protein description                                                                             |
|------------|--------|----------------------|-------------------------------------------------------------------------------------------------|
| P0A9N4     | pflA   | 1.210969             | Pyruvate formate-lyase 1-activating enzyme OS=Escherichia coli O6 GN=pflA                       |
| P0A6A3     | ackA   | 1.211255             | Acetate kinase OS=Escherichia coli O6 GN=ackA                                                   |
| P0ABD5     | accA   | 1.211524             | Acetyl-coenzyme A carboxylase carboxyl transferase subunit alpha OS=Escherichia coli O6 GN=accA |
| P69797     | manX   | 1.212378             | PTS system mannose-specific EIIB component OS=Escherichia coli O6 GN=manX                       |
| P27830     | rffG   | 1.21327              | dTDP-glucose 4,6-dehydratase OS=Escherichia coli O6 GN=rffG                                     |
| P25740     | rfaG   | 1.213473             | Lipopolysaccharide core biosynthesis protein rfaG OS=Escherichia coli O6 GN=rfaG                |
| P0A734     | minE   | 1.213935             | Cell division topological specificity factor OS=Escherichia coli O6 GN=minE                     |
| P0AAN1     | hybE   | 1.214734             | Hydrogenase-2 operon protein hybE OS=Escherichia coli O6 GN=hybE                                |
| P31663     | panC   | 1.215604             | Pantothenate synthetase OS=Escherichia coli O6 GN=panC                                          |
| P23877     | fepG   | 1.216387             | Ferric enterobactin transport system permease protein fepG OS=Escherichia coli O6 GN=fepG       |
| P07024     | ushA   | 1.216622             | Protein ushA OS=Escherichia coli O6 GN=ushA                                                     |
| P0A6Y1     | ihfB   | 1.217281             | Integration host factor subunit beta OS=Escherichia coli O6 GN=ihfB                             |
| P0A6V8     | glk    | 1.218293             | Glucokinase OS=Escherichia coli O6 GN=glk                                                       |
| P0AGJ7     | trmL   | 1.219719             | tRNA (cytidine/uridine-2&#039;-O-)-methyltransferase TrmL OS=Escherichia coli O6 GN=trmL        |
| P21499     | vacB   | 1.220614             | Ribonuclease R OS=Escherichia coli O6 GN=vacB                                                   |
| P0A7G2     | rbfA   | 1.222842             | Ribosome-binding factor A OS=Escherichia coli O6 GN=rbfA                                        |
| P45395     | kdsD   | 1.222858             | Arabinose 5-phosphate isomerase OS=Escherichia coli O6 GN=kdsD                                  |
| W8ZMW8     | yahK   | 1.223448             | Hypothetical zinc-type alcohol dehydrogenase-like protein yahK OS=Escherichia coli O6 GN=yahK   |
| P0A867     | talA   | 1.224714             | Transaldolase A OS=Escherichia coli O6 GN=talA                                                  |
| P21513     | rne    | 1.225304             | Ribonuclease E OS=Escherichia coli O6 GN=rne                                                    |
| P04693     | tyrB   | 1.226196             | Aromatic-amino-acid aminotransferase OS=Escherichia coli O6 GN=tyrB                             |
| P0A7S9     | rpsM   | 1.226236             | 30S ribosomal protein S13 OS=Escherichia coli O6 GN=rpsM                                        |
| P76216     | astB   | 1.226237             | N-succinylarginine dihydrolase OS=Escherichia coli O6 GN=astB                                   |
| P45577     | proQ   | 1.226584             | ProP effector OS=Escherichia coli O6 GN=proQ                                                    |
| Q46893     | ispD   | 1.228449             | 2-C-methyl-D-erythritol 4-phosphate cytidyltransferase OS=Escherichia coli O6 GN=ispD           |
| P0ADW3     | yhcB   | 1.228627             | Putative cytochrome d ubiquinol oxidase subunit 3 OS=Escherichia coli O6 GN=yhcB                |
| P0AG59     | rpsN   | 1.228678             | 30S ribosomal protein S14 OS=Escherichia coli O6 GN=rpsN                                        |
| P30014     | rnt    | 1.2299               | Ribonuclease T OS=Escherichia coli O6 GN=rnt                                                    |
| P52643     | ldhA   | 1.230077             | D-lactate dehydrogenase OS=Escherichia coli O6 GN=ldhA                                          |

| Uniprot ID | Symbol | TMT ratio (high/low) | Protein description                                                                                  |
|------------|--------|----------------------|------------------------------------------------------------------------------------------------------|
| W8ZUA4     | yegE   | 1.231653             | Putative sensor-type protein OS=Escherichia coli O6 GN=yegE                                          |
| P09323     | nagE   | 1.23356              | PTS system, N-acetylglucosamine-specific IIABC component OS=Escherichia coli O6 GN=nagE              |
| P0A8B5     | ybaB   | 1.233723             | Nucleoid-associated protein YbaB OS=Escherichia coli O6 GN=ybaB                                      |
| P19642     | malX   | 1.234494             | PTS system, maltose and glucose-specific IIABC component OS=Escherichia coli O6 GN=malX              |
| W8ZPA8     | yrbA   | 1.234786             | Uncharacterized protein OS=Escherichia coli O6 GN=yrbA                                               |
| W8ZK26     | yfeX   | 1.236289             | Putative uncharacterized protein yfeX OS=Escherichia coli O6 GN=yfeX                                 |
| P18843     | nadE   | 1.23704              | NH(3)-dependent NAD(+) synthetase OS=Escherichia coli O6 GN=nadE                                     |
| P77395     | ybbN   | 1.23759              | Putative uncharacterized protein ybbN OS=Escherichia coli O6 GN=ybbN                                 |
| P66817     | diaA   | 1.237814             | DnaA initiator-associating protein diaA OS=Escherichia coli O6 GN=diaA                               |
| P0ACL0     | glpR   | 1.239169             | Glycerol-3-phosphate regulon repressor OS=Escherichia coli O6 GN=glpR                                |
| P0ADX9     | rsmD   | 1.239825             | Ribosomal RNA small subunit methyltransferase D OS=Escherichia coli O6 GN=rsmD                       |
| P22188     | murE   | 1.239868             | UDP-N-acetylmuramoyl-L-alanyl-D-glutamate--2,6-diaminopimelate ligase OS=Escherichia coli O6 GN=murE |
| P17952     | murC   | 1.241578             | UDP-N-acetylmuramate--L-alanine ligase OS=Escherichia coli O6 GN=murC                                |
| P05707     | srlD   | 1.242243             | Sorbitol-6-phosphate 2-dehydrogenase OS=Escherichia coli O6 GN=srlD                                  |
| P0A9Q7     | adhE   | 1.243191             | Aldehyde-alcohol dehydrogenase OS=Escherichia coli O6 GN=adhE                                        |
| P04825     | pepN   | 1.24338              | Aminopeptidase N OS=Escherichia coli O6 GN=pepN                                                      |
| P37686     | yiaY   | 1.243879             | Probable alcohol dehydrogenase OS=Escherichia coli O6 GN=yiaY                                        |
| P33232     | lldD   | 1.247728             | L-lactate dehydrogenase [cytochrome] OS=Escherichia coli O6 GN=lldD                                  |
| P0AEK4     | fabI   | 1.24824              | Enoyl-[acyl-carrier-protein] reductase (NADH) OS=Escherichia coli O6 GN=fabI                         |
| P0A9Q9     | asd    | 1.248588             | Aspartate-semialdehyde dehydrogenase OS=Escherichia coli O6 GN=asd                                   |
| P0A7E3     | pyrE   | 1.249236             | Orotate phosphoribosyltransferase OS=Escherichia coli O6 GN=pyrE                                     |
| P0ADS2     | zapA   | 1.249298             | Cell division protein ZapA OS=Escherichia coli O6 GN=zapA                                            |
| W8ZR79     | ycgC   | 1.249572             | Putative uncharacterized protein ycgC OS=Escherichia coli O6 GN=ycgC                                 |
| AOA0H2V8N1 | c2473  | 1.253008             | Transposase OS=Escherichia coli O6 GN=c2473                                                          |
| P0AC44     | sdhD   | 1.254979             | Succinate dehydrogenase hydrophobic membrane anchor subunit OS=Escherichia coli O6 GN=sdhD           |
| P0A9S3     | gatD   | 1.255962             | Galactitol-1-phosphate 5-dehydrogenase OS=Escherichia coli O6 GN=gatD                                |
| P0A7G6     | recA   | 1.256429             | Protein recA OS=Escherichia coli O6 GN=recA                                                          |
| P33136     | mdoG   | 1.256652             | Glucans biosynthesis protein G OS=Escherichia coli O6 GN=mdoG                                        |

| Uniprot ID | Symbol | TMT ratio (high/low) | Protein description                                                                       |
|------------|--------|----------------------|-------------------------------------------------------------------------------------------|
| P0A9R4     | fdx    | 1.258939             | 2Fe-2S ferredoxin OS=Escherichia coli O6 GN=fdx                                           |
| P76194     | sufE   | 1.259857             | Cysteine desulfuration protein SufE OS=Escherichia coli O6 GN=sufE                        |
| P0AB43     | ycgL   | 1.260165             | UPF0745 protein YcgL OS=Escherichia coli O6 GN=ycgL                                       |
| A0A0H2V847 | c1695  | 1.260738             | Putative uncharacterized protein OS=Escherichia coli O6 GN=c1695                          |
| P09546     | putA   | 1.261709             | PutA protein OS=Escherichia coli O6 GN=putA                                               |
| P0A650     | flgH   | 1.262982             | Flagellar L-ring protein OS=Escherichia coli O6 GN=flgH                                   |
| P02413     | rplO   | 1.263445             | 50S ribosomal protein L15 OS=Escherichia coli O6 GN=rplO                                  |
| P0AC84     | gloB   | 1.264032             | Hydroxyacylglutathione hydrolase OS=Escherichia coli O6 GN=gloB                           |
| P42593     | ygjL   | 1.264131             | 2,4-dienoyl-CoA reductase (NADPH) OS=Escherichia coli O6 GN=ygjL                          |
| P21645     | lpxD   | 1.264885             | UDP-3-O-[3-hydroxymyristoyl] glucosamine N-acyltransferase OS=Escherichia coli O6 GN=lpxD |
| A0A0H2VCE3 | c3292  | 1.265016             | Potential molybdenum-pterin-binding-protein OS=Escherichia coli O6 GN=c3292               |
| P0A7V3     | rpsC   | 1.265216             | 30S ribosomal protein S3 OS=Escherichia coli O6 GN=rpsC                                   |
| P02930     | tolC   | 1.266728             | Outer membrane protein tolC OS=Escherichia coli O6 GN=tolC                                |
| A0A0H2V793 | c1886  | 1.268021             | Putative uncharacterized protein OS=Escherichia coli O6 GN=c1886                          |
| P0AAT9     | ybeL   | 1.272086             | Uncharacterized protein YbeL OS=Escherichia coli O6 GN=ybeL                               |
| P0A6K6     | deoB   | 1.272934             | Phosphopentomutase OS=Escherichia coli O6 GN=deoB                                         |
| W8ZGW3     | ycbL   | 1.273903             | Putative uncharacterized protein ycbL OS=Escherichia coli O6 GN=ycbL                      |
| P45523     | fkpA   | 1.274308             | FKBP-type peptidyl-prolyl cis-trans isomerase FkpA OS=Escherichia coli O6 GN=fkpA         |
| P60390     | rsmH   | 1.274361             | Ribosomal RNA small subunit methyltransferase H OS=Escherichia coli O6 GN=rsmH            |
| L4VBF4     | spr    | 1.275835             | Lipoprotein spr OS=Escherichia coli O6 GN=spr                                             |
| P77499     | ynhD   | 1.276281             | Probable ATP-dependent transporter sufC OS=Escherichia coli O6 GN=ynhD                    |
| P30859     | artI   | 1.277649             | Putative ABC transporter arginine-binding protein 2 OS=Escherichia coli O6 GN=artI        |
| P69829     | ptsN   | 1.277817             | Nitrogen regulatory IIA protein OS=Escherichia coli O6 GN=ptsN                            |
| P0A993     | fbp    | 1.277999             | Fructose-1,6-bisphosphatase class 1 OS=Escherichia coli O6 GN=fbp                         |
| P0A9J4     | apbA   | 1.278071             | 2-dehydropantoate 2-reductase OS=Escherichia coli O6 GN=apbA                              |
| P0AFH8     | osmY   | 1.278411             | Osmotically-inducible protein Y OS=Escherichia coli O6 GN=osmY                            |
| P33353     | yehQ   | 1.278431             | Putative uncharacterized protein yehQ OS=Escherichia coli O6 GN=yehQ                      |
| P0A705     | infB   | 1.279896             | Translation initiation factor IF-2 OS=Escherichia coli O6 GN=infB                         |
| P00864     | ppc    | 1.280004             | Phosphoenolpyruvate carboxylase OS=Escherichia coli O6 GN=ppc                             |



| Uniprot ID | Symbol | TMT ratio (high/low) | Protein description                                                                       |
|------------|--------|----------------------|-------------------------------------------------------------------------------------------|
| A0A0H2VAT6 | c3736  | 1.280805             | Putative enzyme OS=Escherichia coli O6 GN=c3736                                           |
| P77671     | allB   | 1.280875             | Allantoinase OS=Escherichia coli O6 GN=allB                                               |
| P32132     | typA   | 1.280967             | GTP-binding protein TypA/BipA OS=Escherichia coli O6 GN=typA                              |
| P64451     | ydcL   | 1.281165             | Hypothetical lipoprotein ydcL OS=Escherichia coli O6 GN=ydcL                              |
| P00452     | nrdA   | 1.283296             | Ribonucleoside-diphosphate reductase 1 alpha chain OS=Escherichia coli O6 GN=nrdA         |
| P69902     | frc    | 1.283538             | Formyl-coenzyme A transferase OS=Escherichia coli O6 GN=frc                               |
| P0A9D4     | cysE   | 1.288026             | Serine acetyltransferase OS=Escherichia coli O6 GN=cysE                                   |
| P66948     | yfgC   | 1.28836              | Putative uncharacterized protein yfgC OS=Escherichia coli O6 GN=yfgC                      |
| P69913     | csrA   | 1.288463             | Carbon storage regulator OS=Escherichia coli O6 GN=csrA                                   |
| P12758     | udp    | 1.290515             | Uridine phosphorylase OS=Escherichia coli O6 GN=udp                                       |
| P0A901     | yjel   | 1.290691             | Outer membrane lipoprotein Blc OS=Escherichia coli O6 GN=yjel                             |
| P0A887     | ubiE   | 1.291403             | Ubiquinone/menaquinone biosynthesis methyltransferase ubiE OS=Escherichia coli O6 GN=ubiE |
| P0ADE8     | ygfZ   | 1.291554             | tRNA-modifying protein ygfZ OS=Escherichia coli O6 GN=ygfZ                                |
| P24255     | rpoN   | 1.294366             | RNA polymerase sigma-54 factor OS=Escherichia coli O6 GN=rpoN                             |
| P0A9Q1     | arcA   | 1.294492             | Arginine deiminase OS=Escherichia coli O6 GN=arcA                                         |
| P33346     | yehI   | 1.295019             | Uncharacterized protein YehI OS=Escherichia coli O6 GN=yehI                               |
| P0AED0     | uspA   | 1.297646             | Universal stress protein A OS=Escherichia coli O6 GN=uspA                                 |
| P0A840     | surE   | 1.29954              | Multifunctional protein surE OS=Escherichia coli O6 GN=surE                               |
| P28251     | dut    | 1.300371             | Deoxyuridine-triphosphate nucleotidohydrolase OS=Escherichia coli O6 GN=dut               |
| P0A6E4     | argG   | 1.30113              | Argininosuccinate synthase OS=Escherichia coli O6 GN=argG                                 |
| A0A0H2V6C1 | c0936  | 1.301635             | Uncharacterized protein OS=Escherichia coli O6 GN=c0936                                   |
| W82P71     | ybjK   | 1.302742             | Putative uncharacterized protein ybjK OS=Escherichia coli O6 GN=ybjK                      |
| P52647     | ydbK   | 1.305904             | Pyruvate-flavodoxin oxidoreductase OS=Escherichia coli O6 GN=ydbK                         |
| P76193     | ynhG   | 1.305918             | Putative uncharacterized protein ynhG OS=Escherichia coli O6 GN=ynhG                      |
| P0AEQ3     | glnH   | 1.306649             | Glutamine-binding periplasmic protein OS=Escherichia coli O6 GN=glnH                      |
| P31057     | panB   | 1.307914             | 3-methyl-2-oxobutanoate hydroxymethyltransferase OS=Escherichia coli O6 GN=panB           |
| P0A904     | trxB   | 1.308071             | Thioredoxin reductase OS=Escherichia coli O6 GN=trxB                                      |
| P77634     | ybcM   | 1.308804             | Hypothetical transcriptional regulator ybcM OS=Escherichia coli O6 GN=ybcM                |
| P27248     | gcvT   | 1.309362             | Aminomethyltransferase OS=Escherichia coli O6 GN=gcvT                                     |

| Uniprot ID | Symbol | TMT ratio (high/low) | Protein description                                                                  |
|------------|--------|----------------------|--------------------------------------------------------------------------------------|
| P0ADB7     | ecnB   | 1.310748             | Entericidin B OS=Escherichia coli O6 GN=ecnB                                         |
| P77504     | ybbP   | 1.310811             | Putative uncharacterized protein ybbP OS=Escherichia coli O6 GN=ybbP                 |
| P0AAZ4     | rarA   | 1.310985             | Replication-associated recombination protein A OS=Escherichia coli O6 GN=rarA        |
| P0AGD3     | sodB   | 1.312954             | Superoxide dismutase [Fe] OS=Escherichia coli O6 GN=sodB                             |
| P0A6M4     | dtd    | 1.313401             | D-tyrosyl-tRNA(Tyr) deacylase OS=Escherichia coli O6 GN=dtd                          |
| P62620     | ispG   | 1.313625             | 4-hydroxy-3-methylbut-2-en-1-yl diphosphate synthase OS=Escherichia coli O6 GN=ispG  |
| P0A6Q6     | fabZ   | 1.31567              | 3-hydroxyacyl-[acyl-carrier-protein] dehydratase FabZ OS=Escherichia coli O6 GN=fabZ |
| P0A746     | msrB   | 1.316546             | 3Peptide methionine sulfoxide reductase MsrB OS=Escherichia coli O6 GN=msrB          |
| P33012     | sbmC   | 1.320809             | DNA gyrase inhibitor OS=Escherichia coli O6 GN=sbmC                                  |
| P08839     | ptsl   | 1.320954             | Phosphoenolpyruvate-protein phosphotransferase OS=Escherichia coli O6 GN=ptsl        |
| P75949     | nagZ   | 1.321606             | Beta-hexosaminidase OS=Escherichia coli O6 GN=nagZ                                   |
| W8ZQQ4     | yehM   | 1.324028             | Putative sulfate transporter yehM OS=Escherichia coli O6 GN=yehM                     |
| W8ZNB1     | yhaK   | 1.324565             | Putative uncharacterized protein yhaK OS=Escherichia coli O6 GN=yhaK                 |
| P0ABU9     | tolQ   | 1.324787             | TolQ protein OS=Escherichia coli O6 GN=tolQ                                          |
| P77239     | cusB   | 1.325191             | Cation efflux system protein CusB OS=Escherichia coli O6 GN=cusB                     |
| P77791     | ylaD   | 1.325319             | Maltose O-acetyltransferase OS=Escherichia coli O6 GN=ylaD                           |
| P0A9A6     | ftsZ   | 1.328389             | Cell division protein ftsZ OS=Escherichia coli O6 GN=ftsZ                            |
| A0A0H2VAF4 | c3429  | 1.328467             | Tas protein OS=Escherichia coli O6 GN=c3429                                          |
| P77739     | yniA   | 1.331175             | Putative uncharacterized protein yniA OS=Escherichia coli O6 GN=yniA                 |
| P07118     | valS   | 1.33267              | Valyl-tRNA synthetase OS=Escherichia coli O6 GN=valS                                 |
| P37648     | yhjJ   | 1.333822             | Protein yhjJ OS=Escherichia coli O6 GN=yhjJ                                          |
| A0A0H2VCI8 | c3381  | 1.335038             | Cysteine sulfinate desulfinate OS=Escherichia coli O6 GN=c3381                       |
| P16384     | miaA   | 1.336343             | tRNA dimethylallyltransferase OS=Escherichia coli O6 GN=miaA                         |
| A0A0H2V6Z7 | focD   | 1.336568             | F1C fimbrial usher OS=Escherichia coli O6 GN=focD                                    |
| W9ABI4     | yagU   | 1.336706             | Putative uncharacterized protein yagU OS=Escherichia coli O6 GN=yagU                 |
| P0A6W5     | greA   | 1.337047             | Transcription elongation factor greA OS=Escherichia coli O6 GN=greA                  |
| P25772     | ligB   | 1.337095             | DNA ligase B OS=Escherichia coli O6 GN=ligB                                          |
| P75736     | ybfF   | 1.33797              | Esterase YbfF OS=Escherichia coli O6 GN=ybfF                                         |
| P00935     | metB   | 1.339266             | Cystathionine gamma-synthase OS=Escherichia coli O6 GN=metB                          |

| Uniprot ID | Symbol | TMT ratio (high/low) | Protein description                                                                     |
|------------|--------|----------------------|-----------------------------------------------------------------------------------------|
| P67080     | yggS   | 1.341277             | UPF0001 protein yggS OS=Escherichia coli O6 GN=yggS                                     |
| P0AEW9     | fruK   | 1.341515             | 1-phosphofruktokinase OS=Escherichia coli O6 GN=fruK                                    |
| P67087     | yraL   | 1.342746             | Putative uncharacterized protein yraL OS=Escherichia coli O6 GN=yraL                    |
| P0AFK9     | potD   | 1.343717             | Spermidine/putrescine-binding periplasmic protein OS=Escherichia coli O6 GN=potD        |
| P39404     | bglJ   | 1.344093             | Transcriptional activator protein bglJ OS=Escherichia coli O6 GN=bglJ                   |
| P52076     | ygiX   | 1.345141             | Transcriptional regulatory protein QseB OS=Escherichia coli O6 GN=ygiX                  |
| P0ABU2     | ychF   | 1.346048             | Probable GTP-binding protein ychF OS=Escherichia coli O6 GN=ychF                        |
| P00722     | lacZ   | 1.346539             | Beta-galactosidase OS=Escherichia coli O6 GN=lacZ                                       |
| P0AGB0     | serB   | 1.347928             | Phosphoserine phosphatase OS=Escherichia coli O6 GN=serB                                |
| P0AF48     | yjbQ   | 1.348469             | Putative uncharacterized protein yjbQ OS=Escherichia coli O6 GN=yjbQ                    |
| P0A6I0     | cmk    | 1.348632             | Cytidylate kinase OS=Escherichia coli O6 GN=cmk                                         |
| P75746     | ybgL   | 1.349771             | UPF0271 protein ybgL OS=Escherichia coli O6 GN=ybgL                                     |
| P0AGJ9     | tyrS   | 1.350251             | Tyrosyl-tRNA synthetase OS=Escherichia coli O6 GN=tyrS                                  |
| P0A9U3     | ybiT   | 1.353573             | Uncharacterized ABC transporter ATP-binding protein YbiT OS=Escherichia coli O6 GN=ybiT |
| P0ACD4     | nifU   | 1.354075             | Iron-sulfur cluster assembly scaffold protein IscU OS=Escherichia coli O6 GN=nifU       |
| P0A953     | fabB   | 1.354455             | 3-oxoacyl-[acyl-carrier-protein] synthase 1 OS=Escherichia coli O6 GN=fabB              |
| P0AFG0     | nusG   | 1.356579             | Transcription antitermination protein nusG OS=Escherichia coli O6 GN=nusG               |
| P04079     | guaA   | 1.359249             | GMP synthase [glutamine-hydrolyzing] OS=Escherichia coli O6 GN=guaA                     |
| W8ZL69     | yfgL   | 1.360055             | Putative uncharacterized protein yfgL OS=Escherichia coli O6 GN=yfgL                    |
| P68066     | grcA   | 1.360693             | Autonomous glycyl radical cofactor OS=Escherichia coli O6 GN=grcA                       |
| P10346     | glnQ   | 1.361506             | Glutamine transport ATP-binding protein glnQ OS=Escherichia coli O6 GN=glnQ             |
| P0A6N8     | yeiP   | 1.36644              | Elongation factor P-like protein OS=Escherichia coli O6 GN=yeiP                         |
| P0ACN7     | cytR   | 1.367648             | HTH-type transcriptional repressor CytR OS=Escherichia coli O6 GN=cytR                  |
| Q46861     | ygiQ   | 1.369128             | UPF0313 protein ygiQ OS=Escherichia coli O6 GN=ygiQ                                     |
| P63177     | rlmB   | 1.371113             | 23S rRNA (guanosine-2&#039;-O-)-methyltransferase RlmB OS=Escherichia coli O6 GN=rlmB   |
| P0AES2     | ygcX   | 1.373371             | Glucarate dehydratase OS=Escherichia coli O6 GN=ygcX                                    |
| P0ACF4     | hupB   | 1.373881             | DNA-binding protein HU-beta OS=Escherichia coli O6 GN=hupB                              |
| P0ABQ0     | coaBC  | 1.374398             | Coenzyme A biosynthesis bifunctional protein CoaBC OS=Escherichia coli O6 GN=coaBC      |
| P68191     | sra    | 1.374723             | Stationary-phase-induced ribosome-associated protein OS=Escherichia coli O6 GN=sra      |

| Uniprot ID | Symbol | TMT ratio<br>(high/low) | Protein description                                                                      |
|------------|--------|-------------------------|------------------------------------------------------------------------------------------|
| P69811     | fruB   | 1.375646                | Multiphosphoryl transfer protein OS=Escherichia coli O6 GN=fruB                          |
| AOA0H2V8T6 | c2543  | 1.377561                | Protein yeeZ OS=Escherichia coli O6 GN=c2543                                             |
| AOA0H2VEC0 | c4769  | 1.37882                 | Putative uncharacterized protein OS=Escherichia coli O6 GN=c4769                         |
| W8ZII7     | ydaL   | 1.379916                | Putative uncharacterized protein ydaL OS=Escherichia coli O6 GN=ydaL                     |
| P63883     | amiC   | 1.383293                | N-acetylmuramoyl-L-alanine amidase AmiC OS=Escherichia coli O6 GN=amiC                   |
| P0A7X6     | rimM   | 1.384862                | Ribosome maturation factor rimM OS=Escherichia coli O6 GN=rimM                           |
| P0ADY3     | rplN   | 1.38617                 | 50S ribosomal protein L14 OS=Escherichia coli O6 GN=rplN                                 |
| W8ZP22     | ybjU   | 1.387078                | Low-specificity L-threonine aldolase OS=Escherichia coli O6 GN=ybjU                      |
| P0A9C5     | glnA   | 1.388835                | Glutamine synthetase OS=Escherichia coli O6 GN=glnA                                      |
| P0A6D7     | aroK   | 1.38938                 | Shikimate kinase 1 OS=Escherichia coli O6 GN=aroK                                        |
| P15770     | aroE   | 1.391816                | Shikimate dehydrogenase OS=Escherichia coli O6 GN=aroE                                   |
| P06999     | pfkB   | 1.392738                | 6-phosphofructokinase isozyme 2 OS=Escherichia coli O6 GN=pfkB                           |
| P0AEM9     | fliY   | 1.393008                | Cystine-binding periplasmic protein OS=Escherichia coli O6 GN=fliY                       |
| P62707     | gpmA   | 1.395053                | 2,3-bisphosphoglycerate-dependent phosphoglycerate mutase OS=Escherichia coli O6 GN=gpmA |
| P06961     | cca    | 1.395464                | Multifunctional CCA protein OS=Escherichia coli O6 GN=cca                                |
| W9AJ41     | ygcF   | 1.396647                | Putative uncharacterized protein ygcF OS=Escherichia coli O6 GN=ygcF                     |
| P0AGK8     | iscR   | 1.396979                | HTH-type transcriptional regulator iscR OS=Escherichia coli O6 GN=iscR                   |
| P0AB38     | ycfM   | 1.39711                 | Putative uncharacterized protein ycfM OS=Escherichia coli O6 GN=ycfM                     |
| P0A6J5     | dadA   | 1.399433                | D-amino acid dehydrogenase small subunit OS=Escherichia coli O6 GN=dadA                  |
| P0A698     | uvrA   | 1.402656                | UvrABC system protein A OS=Escherichia coli O6 GN=uvrA                                   |
| P23003     | trmA   | 1.404254                | tRNA (uracil-5-)-methyltransferase OS=Escherichia coli O6 GN=trmA                        |
| P60546     | gmk    | 1.40619                 | Guanylate kinase OS=Escherichia coli O6 GN=gmk                                           |
| P37028     | btuF   | 1.40886                 | Vitamin B12-binding protein OS=Escherichia coli O6 GN=btuF                               |
| P0A6Z6     | nikR   | 1.409182                | Nickel-responsive regulator OS=Escherichia coli O6 GN=nikR                               |
| P40191     | pdxK   | 1.410998                | Pyridoxine kinase OS=Escherichia coli O6 GN=pdxK                                         |
| P0C8J6     | gatY   | 1.41118                 | D-tagatose-1,6-bisphosphate aldolase subunit GatY OS=Escherichia coli O6 GN=gatY         |
| P0A8A0     | yebC   | 1.41245                 | UPF0082 protein yebC OS=Escherichia coli O6 GN=yebC                                      |
| W9AJE7     | ygfM   | 1.41446                 | Putative uncharacterized protein ygfM OS=Escherichia coli O6 GN=ygfM                     |
| P0ACC1     | hemK   | 1.414952                | Protein methyltransferase hemK OS=Escherichia coli O6 GN=hemK                            |

| Uniprot ID | Symbol | TMT ratio (high/low) | Protein description                                                                               |
|------------|--------|----------------------|---------------------------------------------------------------------------------------------------|
| P10908     | ugpQ   | 1.415743             | Glycerophosphoryl diester phosphodiesterase OS=Escherichia coli O6 GN=ugpQ                        |
| P0A9W3     | yjK    | 1.418371             | ABC transporter ATP-binding protein yjK OS=Escherichia coli O6 GN=yjK                             |
| P0AC59     | grxB   | 1.418403             | Glutaredoxin-2 OS=Escherichia coli O6 GN=grxB                                                     |
| P0A6RO     | fabH   | 1.420316             | 3-oxoacyl-[acyl-carrier-protein] synthase 3 OS=Escherichia coli O6 GN=fabH                        |
| A0A0H2VECO | c4769  | 1.421322             | Putative uncharacterized protein OS=Escherichia coli O6 GN=c4769                                  |
| P0AEI1     | miaB   | 1.421824             | (Dimethylallyl)adenosine tRNA methylthiotransferase miaB OS=Escherichia coli O6 GN=miaB           |
| P0A8W5     | yqgE   | 1.422301             | UPF0301 protein yqgE OS=Escherichia coli O6 GN=yqgE                                               |
| W8ZVD2     | hisS   | 1.423476             | Histidyl-tRNA synthetase OS=Escherichia coli O6 GN=hisS                                           |
| P77735     | yajO   | 1.424961             | Hypothetical oxidoreductase yajO OS=Escherichia coli O6 GN=yajO                                   |
| W9AI84     | yfeA   | 1.428871             | Putative uncharacterized protein yfeA OS=Escherichia coli O6 GN=yfeA                              |
| P0ADV7     | yrbC   | 1.430464             | Protein yrbC OS=Escherichia coli O6 GN=yrbC                                                       |
| P0AF24     | nagD   | 1.430486             | NagD protein OS=Escherichia coli O6 GN=nagD                                                       |
| W8ZPV7     | yrfB   | 1.434637             | Putative uncharacterized protein yrfB OS=Escherichia coli O6 GN=yrfB                              |
| P0AG84     | yghA   | 1.435492             | Hypothetical oxidoreductase yghA OS=Escherichia coli O6 GN=yghA                                   |
| P06846     | ebgR   | 1.436109             | Ebg operon repressor OS=Escherichia coli O6 GN=ebgR                                               |
| P0AE91     | creA   | 1.438591             | Protein CreA OS=Escherichia coli O6 GN=creA                                                       |
| P0AB14     | yccJ   | 1.439155             | Uncharacterized protein YccJ OS=Escherichia coli O6 GN=yccJ                                       |
| P0A6J8     | ddlA   | 1.441091             | D-alanine--D-alanine ligase A OS=Escherichia coli O6 GN=ddlA                                      |
| P0A9D8     | dapD   | 1.442104             | 2,3,4,5-tetrahydropyridine-2,6-dicarboxylate N-succinyltransferase OS=Escherichia coli O6 GN=dapD |
| P45565     | ais    | 1.443028             | Lipopolysaccharide core heptose(III)-phosphate phosphatase OS=Escherichia coli O6 GN=ais          |
| P0ABH0     | ftsA   | 1.443857             | Cell division protein ftsA OS=Escherichia coli O6 GN=ftsA                                         |
| P0AA16     | ompR   | 1.444594             | Transcriptional regulatory protein ompR OS=Escherichia coli O6 GN=ompR                            |
| P0A9H1     | mug    | 1.445757             | G/U mismatch-specific DNA glycosylase OS=Escherichia coli O6 GN=mug                               |
| P75913     | ghrA   | 1.446013             | Glyoxylate/hydroxypyruvate reductase A OS=Escherichia coli O6 GN=ghrA                             |
| W8ZS32     | yniC   | 1.448375             | Putative uncharacterized protein yniC OS=Escherichia coli O6 GN=yniC                              |
| P0AG80     | ugpB   | 1.450434             | sn-glycerol-3-phosphate-binding periplasmic protein ugpB OS=Escherichia coli O6 GN=ugpB           |
| P76422     | thiD   | 1.451837             | Phosphomethylpyrimidine kinase OS=Escherichia coli O6 GN=thiD                                     |
| P0AGJ5     | yfiF   | 1.45571              | Hypothetical tRNA/rRNA methyltransferase yfiF OS=Escherichia coli O6 GN=yfiF                      |
| P0A910     | ompA   | 1.456037             | Outer membrane protein A OS=Escherichia coli O6 GN=ompA                                           |

| Uniprot ID | Symbol | TMT ratio (high/low) | Protein description                                                                     |
|------------|--------|----------------------|-----------------------------------------------------------------------------------------|
| P08178     | purM   | 1.457155             | Phosphoribosylformylglycinamide cyclo-ligase OS=Escherichia coli O6 GN=purM             |
| Q46832     | yqhD   | 1.458186             | Hypothetical oxidoreductase yqhD OS=Escherichia coli O6 GN=yqhD                         |
| P29131     | ftsN   | 1.459202             | Cell division protein ftsN OS=Escherichia coli O6 GN=ftsN                               |
| P0A9T0     | serA   | 1.460658             | D-3-phosphoglycerate dehydrogenase OS=Escherichia coli O6 GN=serA                       |
| P76397     | mdtA   | 1.461621             | Multidrug resistance protein mdtA OS=Escherichia coli O6 GN=mdtA                        |
| P0AFW4     | rnk    | 1.463566             | Regulator of nucleoside diphosphate kinase OS=Escherichia coli O6 GN=rnk                |
| P46889     | ftsK   | 1.464028             | DNA translocase FtsK OS=Escherichia coli O6 GN=ftsK                                     |
| P0ABD3     | bfr    | 1.466521             | Bacterioferritin OS=Escherichia coli O6 GN=bfr                                          |
| P77717     | ybaY   | 1.468245             | Putative uncharacterized protein ybaY OS=Escherichia coli O6 GN=ybaY                    |
| P25665     | metE   | 1.468901             | 5-methyltetrahydrofolate--homocysteine methyltransferase OS=Escherichia coli O6 GN=metE |
| A0A0H2V8I2 | c2513  | 1.470402             | Putative uncharacterized protein OS=Escherichia coli O6 GN=c2513                        |
| P31808     | yciK   | 1.471095             | Hypothetical oxidoreductase yciK OS=Escherichia coli O6 GN=yciK                         |
| P0A8W8     | yfbU   | 1.473925             | UPF0304 protein yfbU OS=Escherichia coli O6 GN=yfbU                                     |
| P39451     | adhP   | 1.474855             | Alcohol dehydrogenase, propanol-preferring OS=Escherichia coli O6 GN=adhP               |
| P02918     | mrcA   | 1.475872             | Penicillin-binding protein 1A OS=Escherichia coli O6 GN=mrcA                            |
| P77252     | ykgE   | 1.477294             | Putative uncharacterized protein ykgE OS=Escherichia coli O6 GN=ykgE                    |
| P0C054     | ibpA   | 1.478542             | Small heat shock protein ibpA OS=Escherichia coli O6 GN=ibpA                            |
| P0ABZ6     | surA   | 1.478682             | Chaperone surA OS=Escherichia coli O6 GN=surA                                           |
| P21888     | cysS   | 1.481785             | CysteinyI-tRNA synthetase OS=Escherichia coli O6 GN=cysS                                |
| P07110     | papC   | 1.483284             | PapC protein OS=Escherichia coli O6 GN=papC                                             |
| W8ZMK5     | tbpA   | 1.483872             | Thiamine-binding periplasmic protein OS=Escherichia coli O6 GN=tbpA                     |
| P0ACP5     | gntR   | 1.484143             | HTH-type transcriptional regulator GntR OS=Escherichia coli O6 GN=gntR                  |
| P75915     | ycdY   | 1.484654             | Putative uncharacterized protein ycdY OS=Escherichia coli O6 GN=ycdY                    |
| P77396     | ypdC   | 1.488372             | Uncharacterized HTH-type transcriptional regulator YpdC OS=Escherichia coli O6 GN=ypdC  |
| P0AFB8     | glnG   | 1.489792             | Nitrogen regulation protein NR(I) OS=Escherichia coli O6 GN=glnG                        |
| W8ZIR5     | gcp    | 1.491963             | Probable O-sialoglycoprotein endopeptidase OS=Escherichia coli O6 GN=gcp                |
| Q2M7R5     | yibT   | 1.493778             | Uncharacterized protein YibT OS=Escherichia coli O6 GN=yibT                             |
| P33644     | yfiH   | 1.49407              | Putative uncharacterized protein yfiH OS=Escherichia coli O6 GN=yfiH                    |
| P45759     | yheG   | 1.497546             | Probable general secretion pathway protein E OS=Escherichia coli O6 GN=yheG             |

| Uniprot ID | Symbol | TMT ratio (high/low) | Protein description                                                                                                               |
|------------|--------|----------------------|-----------------------------------------------------------------------------------------------------------------------------------|
| P0ABD8     | accB   | 1.503883             | Biotin carboxyl carrier protein of acetyl-CoA carboxylase OS=Escherichia coli O6 GN=accB                                          |
| P17854     | cysH   | 1.504469             | Phosphoadenosine phosphosulfate reductase OS=Escherichia coli O6 GN=cysH                                                          |
| P0A8E1     | ycfP   | 1.505455             | UPF0227 protein ycfP OS=Escherichia coli O6 GN=ycfP                                                                               |
| P28905     | holC   | 1.507262             | DNA polymerase III, chi subunit OS=Escherichia coli O6 GN=holC                                                                    |
| P10371     | hisA   | 1.508388             | 1-(5-phosphoribosyl)-5-[(5-phosphoribosylamino)methylideneamino] imidazole-4-carboxamide isomerase OS=Escherichia coli O6 GN=hisA |
| P16700     | cysP   | 1.51001              | Thiosulfate-binding protein OS=Escherichia coli O6 GN=cysP                                                                        |
| Q46871     | yqjH   | 1.519048             | Putative uncharacterized protein yqjH OS=Escherichia coli O6 GN=yqjH                                                              |
| P76015     | ycgT   | 1.520604             | Putative uncharacterized protein ycgT OS=Escherichia coli O6 GN=ycgT                                                              |
| P0A9D2     | gst    | 1.52125              | Glutathione S-transferase OS=Escherichia coli O6 GN=gst                                                                           |
| P0AEN8     | fucU   | 1.522184             | L-fucose mutarotase OS=Escherichia coli O6 GN=fucU                                                                                |
| P0A8U0     | syd    | 1.5273               | Protein syd OS=Escherichia coli O6 GN=syd                                                                                         |
| P75957     | lolD   | 1.533036             | Lipoprotein-releasing system ATP-binding protein LolD OS=Escherichia coli O6 GN=lolD                                              |
| P0A731     | mgsA   | 1.538828             | Methylglyoxal synthase OS=Escherichia coli O6 GN=mgsA                                                                             |
| P33030     | yeiR   | 1.539312             | Putative uncharacterized protein yeiR OS=Escherichia coli O6 GN=yeiR                                                              |
| P34209     | ydcF   | 1.540229             | Protein ydcF OS=Escherichia coli O6 GN=ydcF                                                                                       |
| P39160     | uxuB   | 1.543703             | D-mannonate oxidoreductase OS=Escherichia coli O6 GN=uxuB                                                                         |
| P0A8U6     | metJ   | 1.546534             | Met repressor OS=Escherichia coli O6 GN=metJ                                                                                      |
| P75764     | ybhJ   | 1.549114             | Uncharacterized protein YbhJ OS=Escherichia coli O6 GN=ybhJ                                                                       |
| P0A6B4     | alr    | 1.550508             | Alanine racemase, biosynthetic OS=Escherichia coli O6 GN=alr                                                                      |
| P0AF28     | narL   | 1.551944             | Nitrate/nitrite response regulator protein narL OS=Escherichia coli O6 GN=narL                                                    |
| P76329     | yedp   | 1.552543             | Putative mannosyl-3-phosphoglycerate phosphatase OS=Escherichia coli O6 GN=yedP                                                   |
| P60716     | lipA   | 1.55359              | Lipoyl synthase OS=Escherichia coli O6 GN=lipA                                                                                    |
| A0A0H2VDG6 | c3746  | 1.557971             | 2,5-diketo-D-gluconic acid reductase A OS=Escherichia coli O6 GN=c3746                                                            |
| A0A0H2V775 | c0690  | 1.559977             | Putative uncharacterized protein OS=Escherichia coli O6 GN=c0690                                                                  |
| P05458     | ptrA   | 1.560493             | Protease 3 OS=Escherichia coli O6 GN=ptrA                                                                                         |
| P0A823     | sfsA   | 1.561515             | Sugar fermentation stimulation protein A OS=Escherichia coli O6 GN=sfsA                                                           |
| W8ZH73     | htrB   | 1.56334              | Lipid A biosynthesis lauroyl acyltransferase OS=Escherichia coli O6 GN=htrB                                                       |
| P25536     | yhdE   | 1.564288             | Maf-like protein YhdE OS=Escherichia coli O6 GN=yhdE                                                                              |

| Uniprot ID | Symbol | TMT ratio<br>(high/low) | Protein description                                                             |
|------------|--------|-------------------------|---------------------------------------------------------------------------------|
| P0ABM9     | ccmH   | 1.56494                 | Cytochrome c-type biogenesis protein ccmH OS=Escherichia coli O6 GN=ccmH        |
| A0A0H2VCZ2 | c4771  | 1.564984                | Putative carboxymethylenebutenolidase OS=Escherichia coli O6 GN=c4771           |
| P29745     | pepT   | 1.565437                | Peptidase T OS=Escherichia coli O6 GN=pepT                                      |
| A0A0H2VB71 | c3153  | 1.56837                 | Putative outer membrane protein of prophage OS=Escherichia coli O6 GN=c3153     |
| W8ZQC2     | ycbB   | 1.568643                | Putative uncharacterized protein ycbB OS=Escherichia coli O6 GN=ycbB            |
| P05041     | pabB   | 1.579002                | Para-aminobenzoate synthase component I OS=Escherichia coli O6 GN=pabB          |
| P39286     | rsgA   | 1.579288                | Putative ribosome biogenesis GTPase RsgA OS=Escherichia coli O6 GN=rsgA         |
| P22523     | mukB   | 1.581502                | Chromosome partition protein MukB OS=Escherichia coli O6 GN=mukB                |
| P16703     | cysM   | 1.582228                | Cysteine synthase B OS=Escherichia coli O6 GN=cysM                              |
| P0ACF0     | hupA   | 1.589989                | DNA-binding protein HU-alpha OS=Escherichia coli O6 GN=hupA                     |
| P0A818     | rlmH   | 1.593265                | Ribosomal RNA large subunit methyltransferase H OS=Escherichia coli O6 GN=rlmH  |
| P0AEU7     | skp    | 1.594686                | Chaperone protein skp OS=Escherichia coli O6 GN=skp                             |
| P0A753     | rpsL   | 1.595968                | 30S ribosomal protein S12 OS=Escherichia coli O6 GN=rpsL                        |
| P25553     | aldA   | 1.596495                | Aldehyde dehydrogenase A OS=Escherichia coli O6 GN=aldA                         |
| W9AMQ8     | yigP   | 1.601843                | Putative uncharacterized protein yigP OS=Escherichia coli O6 GN=yigP            |
| P77488     | dxs    | 1.611799                | 1-deoxy-D-xylulose-5-phosphate synthase OS=Escherichia coli O6 GN=dxs           |
| P0ADA1     | tesA   | 1.61266                 | Thioesterase 1/protease 1/lysophospholipase L1 OS=Escherichia coli O6 GN=tesA   |
| P17315     | cirA   | 1.617483                | Colicin I receptor OS=Escherichia coli O6 GN=cirA                               |
| P0AEE5     | mgIB   | 1.617527                | D-galactose-binding periplasmic protein OS=Escherichia coli O6 GN=mgIB          |
| P25516     | acnA   | 1.622036                | Aconitate hydratase 1 OS=Escherichia coli O6 GN=acnA                            |
| P0ADB1     | osmE   | 1.626253                | Osmotically-inducible putative lipoprotein OsmE OS=Escherichia coli O6 GN=osmE  |
| A0A0H2VCJ9 | c3794  | 1.628393                | Putative uncharacterized protein OS=Escherichia coli O6 GN=c3794                |
| A0A0H2V525 | c0327  | 1.62877                 | Putative uncharacterized protein OS=Escherichia coli O6 GN=c0327                |
| A0A0H2VAA8 | c3459  | 1.629308                | Possible hypoxanthine oxidase xdhD OS=Escherichia coli O6 GN=c3459              |
| A0A0H2VAR6 | c2459  | 1.631923                | Putative peptide synthetase OS=Escherichia coli O6 GN=c2459                     |
| A0A0H2VBM9 | c3363  | 1.634285                | Uncharacterized protein OS=Escherichia coli O6 GN=c3363                         |
| P0ADI7     | yecD   | 1.639736                | Hypothetical isochorismatase family protein yecD OS=Escherichia coli O6 GN=yecD |
| P76138     | yneI   | 1.639998                | Aldehyde-dehydrogenase like protein yneI OS=Escherichia coli O6 GN=yneI         |
| P30177     | ybiB   | 1.640596                | Putative uncharacterized protein ybiB OS=Escherichia coli O6 GN=ybiB            |



| Uniprot ID | Symbol | TMT ratio (high/low) | Protein description                                                                      |
|------------|--------|----------------------|------------------------------------------------------------------------------------------|
| P07650     | deoA   | 1.641398             | Thymidine phosphorylase OS=Escherichia coli O6 GN=deoA                                   |
| P0A8G6     | wrbA   | 1.645332             | Flavoprotein wrbA OS=Escherichia coli O6 GN=wrbA                                         |
| A0A0H2V8N2 | c1937  | 1.648014             | Putative uncharacterized protein OS=Escherichia coli O6 GN=c1937                         |
| P76034     | yciT   | 1.65254              | Hypothetical transcriptional regulator yciT OS=Escherichia coli O6 GN=yciT               |
| P04391     | argI   | 1.652644             | Ornithine carbamoyltransferase OS=Escherichia coli O6 GN=argI                            |
| P0A7E1     | pyrD   | 1.653228             | Dihydroorotate dehydrogenase OS=Escherichia coli O6 GN=pyrD                              |
| P10384     | fadL   | 1.65659              | Long-chain fatty acid transport protein OS=Escherichia coli O6 GN=fadL                   |
| A0A0H2V9S7 | c3224  | 1.658399             | Putative uncharacterized protein OS=Escherichia coli O6 GN=c3224                         |
| A0A0H2V9H7 | c1846  | 1.662737             | Putative conserved protein OS=Escherichia coli O6 GN=c1846                               |
| P62617     | ispF   | 1.665632             | 2-C-methyl-D-erythritol 2,4-cyclodiphosphate synthase OS=Escherichia coli O6 GN=ispF     |
| P29018     | cydD   | 1.666266             | Transport ATP-binding protein cydD OS=Escherichia coli O6 GN=cydD                        |
| A0A0H2V7F1 | c0823  | 1.668707             | Putative conserved protein OS=Escherichia coli O6 GN=c0823                               |
| P0A7Y0     | rnc    | 1.669847             | Ribonuclease 3 OS=Escherichia coli O6 GN=rnc                                             |
| P12282     | moeB   | 1.67597              | Molybdopterin-synthase adenyltransferase OS=Escherichia coli O6 GN=moeB                  |
| P22939     | ispA   | 1.678048             | Geranyltranstransferase OS=Escherichia coli O6 GN=ispA                                   |
| P0AEN1     | fre    | 1.679035             | NAD(P)H-flavin reductase OS=Escherichia coli O6 GN=fre                                   |
| A0A0H2V8F6 | c2383  | 1.689652             | Outer membrane protein N OS=Escherichia coli O6 GN=c2383                                 |
| P0AEH5     | elaB   | 1.699446             | Protein elaB OS=Escherichia coli O6 GN=elaB                                              |
| P08142     | ilvB   | 1.706019             | Acetolactate synthase isozyme I large subunit OS=Escherichia coli O6 GN=ilvB             |
| P0AEC8     | dcuS   | 1.713664             | Sensor protein dcuS OS=Escherichia coli O6 GN=dcuS                                       |
| P46859     | gntK   | 1.714286             | Thermoresistant gluconokinase OS=Escherichia coli O6 GN=gntK                             |
| A0A0H2V4M9 | c0413  | 1.715948             | Putative aldo/keto reductase OS=Escherichia coli O6 GN=c0413                             |
| A0A0H2VBV9 | c3029  | 1.72093              | RatA homolog OS=Escherichia coli O6 GN=c3029                                             |
| A0A0H2VBF0 | c3892  | 1.720975             | Putative N-acetylgalactosamine-6-phosphate deacetylase OS=Escherichia coli O6 GN=c3892   |
| P37613     | yhhK   | 1.730718             | PanD regulatory factor OS=Escherichia coli O6 GN=yhhK                                    |
| P0AF67     | yjeE   | 1.73081              | tRNA threonylcarbamoyladenosine biosynthesis protein TsaE OS=Escherichia coli O6 GN=yjeE |
| P03007     | dnaQ   | 1.735573             | DNA polymerase III, epsilon chain OS=Escherichia coli O6 GN=dnaQ                         |
| P09030     | xthA   | 1.736467             | Exodeoxyribonuclease III OS=Escherichia coli O6 GN=xthA                                  |
| A0A0H2V5K7 | c0959  | 1.739775             | Putative Regulatory protein OS=Escherichia coli O6 GN=c0959                              |

| Uniprot ID | Symbol | TMT ratio (high/low) | Protein description                                                             |
|------------|--------|----------------------|---------------------------------------------------------------------------------|
| P69828     | gatA   | 1.751035             | PTS system galactitol-specific EIIA component OS=Escherichia coli O6 GN=gatA    |
| P05793     | ilvC   | 1.751529             | Ketol-acid reductoisomerase OS=Escherichia coli O6 GN=ilvC                      |
| P0A9P6     | deaD   | 1.755402             | Cold-shock DEAD box protein A OS=Escherichia coli O6 GN=deaD                    |
| P0AB80     | ilvE   | 1.771877             | Branched-chain-amino-acid aminotransferase OS=Escherichia coli O6 GN=ilvE       |
| P0A729     | yceF   | 1.772595             | Maf-like protein yceF OS=Escherichia coli O6 GN=yceF                            |
| P0ADU5     | ygiW   | 1.774341             | Protein YgiW OS=Escherichia coli O6 GN=ygiW                                     |
| A0A0H2VCZ6 | c4776  | 1.774804             | Putative uncharacterized protein OS=Escherichia coli O6 GN=c4776                |
| P21507     | srmB   | 1.776175             | ATP-dependent RNA helicase srmB OS=Escherichia coli O6 GN=srmB                  |
| P06986     | hisC   | 1.786947             | Histidinol-phosphate aminotransferase OS=Escherichia coli O6 GN=hisC            |
| P25397     | tehB   | 1.787562             | Tellurite resistance protein tehB OS=Escherichia coli O6 GN=tehB                |
| P0A9C9     | glpX   | 1.794526             | Fructose-1,6-bisphosphatase class 2 OS=Escherichia coli O6 GN=glpX              |
| P76585     | yphG   | 1.801449             | Putative uncharacterized protein yphG OS=Escherichia coli O6 GN=yphG            |
| P77269     | yphF   | 1.812474             | ABC transporter Periplasmic binding protein yphF OS=Escherichia coli O6 GN=yphF |
| P60422     | rplB   | 1.814917             | 50S ribosomal protein L2 OS=Escherichia coli O6 GN=rplB                         |
| A0A0H2V9V0 | c3206  | 1.816159             | Putative uncharacterized protein OS=Escherichia coli O6 GN=c3206                |
| P0A940     | yaeT   | 1.835757             | Outer membrane protein assembly factor yaeT OS=Escherichia coli O6 GN=yaeT      |
| A0A0H2VAQ8 | c3692  | 1.839123             | Uncharacterized protein OS=Escherichia coli O6 GN=c3692                         |
| P0A7Y4     | rnhA   | 1.839621             | Ribonuclease HI OS=Escherichia coli O6 GN=rnhA                                  |
| P62522     | ilvI   | 1.851141             | Acetolactate synthase isozyme III large subunit OS=Escherichia coli O6 GN=ilvI  |
| P0AFL9     | pqiA   | 1.858456             | Paraquat-inducible protein A OS=Escherichia coli O6 GN=pqiA                     |
| A0A0H2VAH8 | c3470  | 1.859477             | Putative uncharacterized protein OS=Escherichia coli O6 GN=c3470                |
| P76481     | yfbK   | 1.861556             | Putative uncharacterized protein yfbK OS=Escherichia coli O6 GN=yfbK            |
| P0ADP0     | yigB   | 1.867521             | Putative uncharacterized protein yigB OS=Escherichia coli O6 GN=yigB            |
| P77318     | ydeN   | 1.871547             | Putative sulfatase ydeN OS=Escherichia coli O6 GN=ydeN                          |
| P0AF18     | nagA   | 1.877465             | N-acetylglucosamine-6-phosphate deacetylase OS=Escherichia coli O6 GN=nagA      |
| A0A0H2VBR0 | c4113  | 1.885138             | Putative uncharacterized protein OS=Escherichia coli O6 GN=c4113                |
| P0A9M2     | hpt    | 1.886001             | Hypoxanthine phosphoribosyltransferase OS=Escherichia coli O6 GN=hpt            |
| P16456     | selD   | 1.887084             | Selenide, water dikinase OS=Escherichia coli O6 GN=selD                         |
| P32156     | rhaM   | 1.891938             | L-rhamnose mutarotase OS=Escherichia coli O6 GN=rhaM                            |

| Uniprot ID | Symbol | TMT ratio<br>(high/low) | Protein description                                                                                   |
|------------|--------|-------------------------|-------------------------------------------------------------------------------------------------------|
| P13039     | fes    | 1.893702                | Enterochelin esterase OS=Escherichia coli O6 GN=fes                                                   |
| P05791     | ilvD   | 1.89667                 | Dihydroxy-acid dehydratase OS=Escherichia coli O6 GN=ilvD                                             |
| A0A0H2V801 | c1628  | 1.908024                | Protein ycgM OS=Escherichia coli O6 GN=c1628                                                          |
| P46837     | yhgF   | 1.909524                | Protein yhgF OS=Escherichia coli O6 GN=yhgF                                                           |
| P0ACM3     | ydfH   | 1.910041                | Uncharacterized HTH-type transcriptional regulator ydfH OS=Escherichia coli O6 GN=ydfH                |
| A0A0H2VBY7 | c4442  | 1.910362                | Putative uncharacterized protein OS=Escherichia coli O6 GN=c4442                                      |
| P0ACG1     | stpA   | 1.914269                | DNA-binding protein stpA OS=Escherichia coli O6 GN=stpA                                               |
| W9A0M2     | yjeP   | 1.917462                | Putative uncharacterized protein yjeP OS=Escherichia coli O6 GN=yjeP                                  |
| P0AEI4     | rimO   | 1.927379                | Ribosomal protein S12 methylthiotransferase RimO OS=Escherichia coli O6 GN=rimO                       |
| P62623     | ispH   | 1.939262                | 4-hydroxy-3-methylbut-2-enyl diphosphate reductase OS=Escherichia coli O6 GN=ispH                     |
| P0C8J8     | gatZ   | 1.944344                | D-tagatose-1,6-bisphosphate aldolase subunit gatZ OS=Escherichia coli O6 GN=gatZ                      |
| P23843     | oppA   | 1.94598                 | Periplasmic oligopeptide-binding protein OS=Escherichia coli O6 GN=oppA                               |
| P0AGD1     | sodC   | 1.957044                | Superoxide dismutase [Cu-Zn] OS=Escherichia coli O6 GN=sodC                                           |
| P0AEZ3     | minD   | 1.973464                | Septum site-determining protein minD OS=Escherichia coli O6 GN=minD                                   |
| P30138     | thiF   | 1.97431                 | Adenylyltransferase thiF OS=Escherichia coli O6 GN=thiF                                               |
| A0A0H2V897 | c1281  | 1.979874                | Putative uncharacterized protein OS=Escherichia coli O6 GN=c1281                                      |
| P36649     | yacK   | 1.9919                  | Blue copper oxidase cueO OS=Escherichia coli O6 GN=yacK                                               |
| P0AEU0     | hisJ   | 1.994402                | Histidine-binding periplasmic protein OS=Escherichia coli O6 GN=hisJ                                  |
| A0A0H2V9X5 | c3240  | 2.010197                | Putative uncharacterized protein OS=Escherichia coli O6 GN=c3240                                      |
| P0AEX9     | malE   | 2.019326                | Maltose-binding periplasmic protein OS=Escherichia coli O6 GN=malE                                    |
| A0A0H2VCY9 | c4920  | 2.020389                | Starvation sensing protein rspA OS=Escherichia coli O6 GN=c4920                                       |
| A0A0H2VAX4 | c3016  | 2.022373                | Putative uncharacterized protein OS=Escherichia coli O6 GN=c3016                                      |
| P25665     | metE   | 2.024312                | 5-methyltetrahydropteroyltriglutamate--homocysteine methyltransferase OS=Escherichia coli O6 GN=metE  |
| P0A9Z1     | glnB   | 2.037425                | Nitrogen regulatory protein P-II 1 OS=Escherichia coli O6 GN=glnB                                     |
| P76116     | yncE   | 2.038899                | Putative uncharacterized protein yncE OS=Escherichia coli O6 GN=yncE                                  |
| W8ZF88     | thiJ   | 2.052575                | 4-methyl-5-(B-hydroxyethyl)-thiazole monophosphate biosynthesis enzyme OS=Escherichia coli O6 GN=thiJ |
| P0ABG4     | ftsW   | 2.05414                 | Cell division protein ftsW OS=Escherichia coli O6 GN=ftsW                                             |
| A0A0H2VAD7 | c3400  | 2.056738                | Putative uncharacterized protein OS=Escherichia coli O6 GN=c3400                                      |

| Uniprot ID | Symbol | TMT ratio (high/low) | Protein description                                                                   |
|------------|--------|----------------------|---------------------------------------------------------------------------------------|
| A0A0H2VD31 | c3611  | 2.060232             | Transposase insD for insertion element IS2A/D/F/H/I/K OS=Escherichia coli O6 GN=c3611 |
| P0A7B1     | ppk    | 2.065085             | Polyphosphate kinase OS=Escherichia coli O6 GN=ppk                                    |
| P0AC81     | gloA   | 2.07489              | Lactoylglutathione lyase OS=Escherichia coli O6 GN=gloA                               |
| P16688     | phnj   | 2.097749             | PhnJ protein OS=Escherichia coli O6 GN=phnj                                           |
| P0A6C1     | nfo    | 2.098401             | Endonuclease 4 OS=Escherichia coli O6 GN=nfo                                          |
| A0A0H2V6G6 | c1466  | 2.103717             | Putative tail component of prophage OS=Escherichia coli O6 GN=c1466                   |
| P09158     | speE   | 2.10475              | Polyamine aminopropyltransferase OS=Escherichia coli O6 GN=speE                       |
| P37340     | mdtK   | 2.114023             | Multidrug resistance protein MdtK OS=Escherichia coli O6 GN=mdtK                      |
| P76584     | yphB   | 2.114579             | Putative uncharacterized protein yphB OS=Escherichia coli O6 GN=yphB                  |
| W9AJR9     | insl   | 2.117925             | IS30 transposase OS=Escherichia coli O6 GN=insl                                       |
| A0A0H2V942 | c2723  | 2.125706             | Uncharacterized protein OS=Escherichia coli O6 GN=c2723                               |
| P0AEL3     | feoA   | 2.128162             | Ferrous iron transport protein A OS=Escherichia coli O6 GN=f eoA                      |
| P19636     | eutC   | 2.130259             | Ethanolamine ammonia-lyase light chain OS=Escherichia coli O6 GN=eutC                 |
| P27859     | yigW   | 2.155711             | 3'-5' ssDNA/RNA exonuclease TatD OS=Escherichia coli O6 GN=yigW                       |
| P33362     | yehZ   | 2.217292             | Glycine betaine-binding protein YehZ OS=Escherichia coli O6 GN=yehZ                   |
| P16525     | tus    | 2.21837              | DNA replication terminus site-binding protein OS=Escherichia coli O6 GN=tus           |
| P76535     | murQ   | 2.220793             | N-acetylmuramic acid 6-phosphate etherase OS=Escherichia coli O6 GN=murQ              |
| P23524     | yhaD   | 2.226358             | Glycerate 2-kinase OS=Escherichia coli O6 GN=yhaD                                     |
| P20099     | bisC   | 2.23938              | Biotin sulfoxide reductase OS=Escherichia coli O6 GN=bisC                             |
| A0A0H2V9V8 | c3150  | 2.242608             | Putative uncharacterized protein OS=Escherichia coli O6 GN=c3150                      |
| P0AC81     | gloA   | 2.249559             | Lactoylglutathione lyase OS=Escherichia coli O6 GN=gloA                               |
| P31447     | yidj   | 2.253586             | Putative sulfatase yidJ OS=Escherichia coli O6 GN=yidJ                                |
| P43341     | lpxH   | 2.255644             | UDP-2,3-diacetylglucosamine hydrolase OS=Escherichia coli O6 GN=lpxH                  |
| P23827     | eco    | 2.281326             | Ecotin OS=Escherichia coli O6 GN=eco                                                  |
| P19317     | narW   | 2.290047             | Respiratory nitrate reductase 2 delta chain OS=Escherichia coli O6 GN=narW            |
| P76154     | ydfK   | 2.290511             | Cold shock protein YdfK OS=Escherichia coli O6 GN=ydfK                                |
| P17846     | cysl   | 2.300577             | Sulfite reductase [NADPH] hemoprotein beta-component OS=Escherichia coli O6 GN=cysl   |
| A0A0H2V728 | c1804  | 2.307321             | Uncharacterized protein OS=Escherichia coli O6 GN=c1804                               |
| P37650     | yhjL   | 2.313274             | Cellulose synthase operon protein C OS=Escherichia coli O6 GN=yhjL                    |

| Uniprot ID | Symbol | TMT ratio<br>(high/low) | Protein description                                                                                |
|------------|--------|-------------------------|----------------------------------------------------------------------------------------------------|
| A0A0H2V9Q2 | c3187  | 2.321637                | Uncharacterized protein OS=Escherichia coli O6 GN=c3187                                            |
| P0A812     | ruvB   | 2.338898                | Holliday junction ATP-dependent DNA helicase ruvB OS=Escherichia coli O6 GN=ruvB                   |
| P09152     | narG   | 2.354704                | Respiratory nitrate reductase 1 alpha chain OS=Escherichia coli O6 GN=narG                         |
| W8ZQQ8     | ycdO   | 2.368255                | UPF0409 protein ycdO OS=Escherichia coli O6 GN=ycdO                                                |
| P60293     | mukF   | 2.373406                | Chromosome partition protein mukF OS=Escherichia coli O6 GN=mukF                                   |
| P30137     | thiE   | 2.374841                | Thiamine-phosphate pyrophosphorylase OS=Escherichia coli O6 GN=thiE                                |
| P0AAJ5     | fdoH   | 2.378664                | Formate dehydrogenase-O iron-sulfur subunit OS=Escherichia coli O6 GN=fdoH                         |
| P32718     | yjcT   | 2.386942                | D-allose kinase OS=Escherichia coli O6 GN=yjcT                                                     |
| P14375     | hydG   | 2.446826                | Transcriptional Regulatory protein zraR OS=Escherichia coli O6 GN=hydG                             |
| P03841     | malM   | 2.531905                | Maltose operon periplasmic protein OS=Escherichia coli O6 GN=malM                                  |
| P42598     | ygjQ   | 2.532874                | Uncharacterized protein YgjQ OS=Escherichia coli O6 GN=ygjQ                                        |
| A0A0H2VBV0 | c3012  | 2.534806                | Arsenate reductase OS=Escherichia coli O6 GN=c3012                                                 |
| W8ZWI3     | yggM   | 2.552565                | Putative uncharacterized protein yggM OS=Escherichia coli O6 GN=yggM                               |
| P06720     | meIA   | 2.698849                | Alpha-galactosidase OS=Escherichia coli O6 GN=meIA                                                 |
| P0AFP4     | ybbO   | 2.722191                | Uncharacterized oxidoreductase ybbO OS=Escherichia coli O6 GN=ybbO                                 |
| W9AHM5     | yeiT   | 2.729987                | Hypothetical oxidoreductase yeiT OS=Escherichia coli O6 GN=yeiT                                    |
| A0A0H2V731 | c1273  | 2.745801                | Antigen 43 OS=Escherichia coli O6 GN=c1273                                                         |
| P46122     | yajl   | 2.816604                | Uncharacterized lipoprotein Yajl OS=Escherichia coli O6 GN=yajl                                    |
| P08400     | phoR   | 2.835813                | Phosphate regulon sensor protein phoR OS=Escherichia coli O6 GN=phoR                               |
| P76108     | ydcS   | 3.009163                | Putative ABC transporter Periplasmic binding protein ydcS OS=Escherichia coli O6 GN=ydcS           |
| A0A0H2V7S0 | c0976  | 3.036425                | Putative uncharacterized protein OS=Escherichia coli O6 GN=c0976                                   |
| P31678     | otsB   | 3.053632                | Trehalose-phosphatase OS=Escherichia coli O6 GN=otsB                                               |
| A0A0H2V8U3 | c1522  | 3.085827                | Putative uncharacterized protein OS=Escherichia coli O6 GN=c1522                                   |
| P0AEJ2     | entC   | 3.113252                | Isochorismate synthase entC OS=Escherichia coli O6 GN=entC                                         |
| Q46904     | ygcN   | 3.138707                | Probable electron transfer flavoprotein-quinone oxidoreductase ygcN OS=Escherichia coli O6 GN=ygcN |
| P0ABC9     | betT   | 3.335455                | High-affinity choline transport protein OS=Escherichia coli O6 GN=betT                             |
| P0AA93     | ypdA   | 3.338627                | Sensor histidine kinase ypdA OS=Escherichia coli O6 GN=ypdA                                        |
| P36943     | eaeH   | 3.454658                | Putative adhesin OS=Escherichia coli O6 GN=eaeH                                                    |

| Uniprot ID | Symbol | TMT ratio (high/low) | Protein description                                                              |
|------------|--------|----------------------|----------------------------------------------------------------------------------|
| P0A976     | cspF   | 3.459181             | Cold shock-like protein CspF OS=Escherichia coli O6 GN=cspF                      |
| A0A0H2VAX2 | c2526  | 3.481079             | Putative uncharacterized protein OS=Escherichia coli O6 GN=c2526                 |
| P23847     | dppA   | 3.504416             | Periplasmic dipeptide transport protein OS=Escherichia coli O6 GN=dppA           |
| P17445     | betB   | 3.6345837            | NAD/NADP-dependent betaine aldehyde dehydrogenase OS=Escherichia coli O6 GN=betB |
| P0AFM2     | proX   | 3.653601             | Glycine betaine-binding periplasmic protein OS=Escherichia coli O6 GN=proX       |
| P36929     | rsmB   | 3.67724              | Ribosomal RNA small subunit methyltransferase B OS=Escherichia coli O6 GN=rsmB   |
| P33937     | napA   | 3.792738             | Periplasmic nitrate reductase OS=Escherichia coli O6 GN=napA                     |
| A0A0H2VE10 | c4566  | 3.862595             | Hypothetical transcriptional regulator yfjR OS=Escherichia coli O6 GN=c4566      |
| A0A0H2VED5 | c4283  | 4.457541             | Putative phosphocarrier protein OS=Escherichia coli O6 GN=c4283                  |
| P37351     | rpiB   | 5.392922             | Ribose 5-phosphate isomerase B OS=Escherichia coli O6 GN=rpiB                    |

**Supplementary Table S2 – TMT ratio with DBHA**

| Uniprot ID | Symbol | TMT ratio (high/low) | Protein description                                                                    |
|------------|--------|----------------------|----------------------------------------------------------------------------------------|
| P02931     | ompF   | 0.366961442          | Outer membrane protein F OS=Escherichia coli O6 GN=ompF                                |
| P39325     | ytfQ   | 0.438457123          | ABC transporter Periplasmic binding protein ytfQ OS=Escherichia coli O6 GN=ytfQ        |
| P0A7A9     | ppa    | 0.465958862          | Inorganic pyrophosphatase OS=Escherichia coli O6 GN=ppa                                |
| P69783     | crr    | 0.468220682          | Glucose-specific phosphotransferase enzyme IIA component OS=Escherichia coli O6 GN=crr |
| P02413     | rplO   | 0.477810021          | 50S ribosomal protein L15 OS=Escherichia coli O6 GN=rplO                               |
| P05804     | uidA   | 0.483706167          | Beta-glucuronidase OS=Escherichia coli O6 GN=uidA                                      |
| P37661     | yhjW   | 0.490896269          | Membrane-protein yhjW OS=Escherichia coli O6 GN=yhjW                                   |
| P0A7K2     | rplL   | 0.494399527          | 50S ribosomal protein L7/L12 OS=Escherichia coli O6 GN=rplL                            |
| P0ABJ9     | cydA   | 0.522692172          | Cytochrome d ubiquinol oxidase subunit 1 OS=Escherichia coli O6 GN=cydA                |
| P0A8G3     | uxaC   | 0.526978468          | Uronate isomerase OS=Escherichia coli O6 GN=uxaC                                       |
| P0AC53     | zwf    | 0.52921293           | Glucose-6-phosphate 1-dehydrogenase OS=Escherichia coli O6 GN=zwf                      |
| P04983     | rbsA   | 0.531094237          | Ribose import ATP-binding protein RbsA OS=Escherichia coli O6 GN=rbsA                  |
| P66948     | yfgC   | 0.532373868          | Putative uncharacterized protein yfgC OS=Escherichia coli O6 GN=yfgC                   |
| P0A7U7     | rpsT   | 0.53730558           | 30S ribosomal protein S20 OS=Escherichia coli O6 GN=rpsT                               |
| P0A862     | tpx    | 0.538343988          | Thiol peroxidase OS=Escherichia coli O6 GN=tpx                                         |

| Uniprot ID | Symbol | TMT ratio (high/low) | Protein description                                                                                                   |
|------------|--------|----------------------|-----------------------------------------------------------------------------------------------------------------------|
| P0A9Q7     | adhE   | 0.53968755           | Aldehyde-alcohol dehydrogenase OS=Escherichia coli O6 GN=adhE                                                         |
| P68919     | rplY   | 0.540290112          | 50S ribosomal protein L25 OS=Escherichia coli O6 GN=rplY                                                              |
| P9AA25     | trxA   | 0.541948454          | Thioredoxin-1 OS=Escherichia coli O6 GN=trxA                                                                          |
| P00490     | malP   | 0.547823706          | Maltodextrin phosphorylase OS=Escherichia coli O6 GN=malP                                                             |
| P37685     | aldB   | 0.560893351          | Aldehyde dehydrogenase B OS=Escherichia coli O6 GN=aldB                                                               |
| P0AG59     | rpsN   | 0.564345119          | 30S ribosomal protein S14 OS=Escherichia coli O6 GN=rpsN                                                              |
| P0A8R0     | rraA   | 0.568879571          | Regulator of ribonuclease activity A OS=Escherichia coli O6 GN=rraA                                                   |
| P0A853     | tnaA   | 0.568996121          | Tryptophanase OS=Escherichia coli O6 GN=tnaA                                                                          |
| P02925     | rbsB   | 0.569184611          | D-ribose-binding periplasmic protein OS=Escherichia coli O6 GN=rbsB                                                   |
| P0ADY7     | rplP   | 0.580072108          | 50S ribosomal protein L16 OS=Escherichia coli O6 GN=rplP                                                              |
| P0ADV7     | yrbC   | 0.581576             | Protein yrbC OS=Escherichia coli O6 GN=yrbC                                                                           |
| P17169     | glmS   | 0.582251545          | Glucosamine--fructose-6-phosphate aminotransferase [isomerizing] OS=Escherichia coli O6 GN=glmS                       |
| P0A8N5     | lysU   | 0.58376284           | Lysyl-tRNA synthetase, heat inducible OS=Escherichia coli O6 GN=lysU                                                  |
| P07913     | tdh    | 0.589848018          | L-threonine 3-dehydrogenase OS=Escherichia coli O6 GN=tdh                                                             |
| P04982     | rbsD   | 0.590686958          | D-ribose pyranase OS=Escherichia coli O6 GN=rbsD                                                                      |
| P0A6T1     | pgi    | 0.592483686          | Glucose-6-phosphate isomerase OS=Escherichia coli O6 GN=pgi                                                           |
| P0AA10     | rplM   | 0.59282381           | 50S ribosomal protein L13 OS=Escherichia coli O6 GN=rplM                                                              |
| P0AFG6     | sucB   | 0.595179108          | Dihydrolipoamide succinyltransferase component of 2-oxoglutarate dehydrogenase complex OS=Escherichia coli O6 GN=sucB |
| P0A8N3     | lysS   | 0.595541468          | Lysyl-tRNA synthetase OS=Escherichia coli O6 GN=lysS                                                                  |
| P0ADZ0     | rplW   | 0.59766627           | 50S ribosomal protein L23 OS=Escherichia coli O6 GN=rplW                                                              |
| P0AC38     | aspA   | 0.599067963          | Aspartate ammonia-lyase OS=Escherichia coli O6 GN=aspA                                                                |
| P00550     | mtlA   | 0.603153145          | PTS system, mannitol-specific IIABC component OS=Escherichia coli O6 GN=mtlA                                          |
| P28629     | adiA   | 0.60391285           | Biodegradative arginine decarboxylase OS=Escherichia coli O6 GN=adiA                                                  |
| P0A6F3     | glpK   | 0.607440805          | Glycerol kinase OS=Escherichia coli O6 GN=glpK                                                                        |
| P19926     | agp    | 0.612156954          | Glucose-1-phosphatase OS=Escherichia coli O6 GN=agp                                                                   |
| P02359     | rpsG   | 0.618532808          | 30S ribosomal protein S7 OS=Escherichia coli O6 GN=rpsG                                                               |
| P00350     | gnd    | 0.619084082          | 6-phosphogluconate dehydrogenase, decarboxylating OS=Escherichia coli O6 GN=gnd                                       |
| P0AG44     | rplQ   | 0.619459508          | 50S ribosomal protein L17 OS=Escherichia coli O6 GN=rplQ                                                              |

| Uniprot ID | Symbol | TMT ratio (high/low) | Protein description                                                                      |
|------------|--------|----------------------|------------------------------------------------------------------------------------------|
| P0ABD8     | accB   | 0.621883849          | Biotin carboxyl carrier protein of acetyl-CoA carboxylase OS=Escherichia coli O6 GN=accB |
| P21507     | srmB   | 0.621945928          | ATP-dependent RNA helicase srmB OS=Escherichia coli O6 GN=srmB                           |
| P0A7X3     | rpsI   | 0.622006972          | 30S ribosomal protein S9 OS=Escherichia coli O6 GN=rpsI                                  |
| P0AG16     | purF   | 0.6229395            | Amidophosphoribosyltransferase OS=Escherichia coli O6 GN=purF                            |
| P25748     | galS   | 0.624099279          | Mgl repressor and galactose ultrainduction factor OS=Escherichia coli O6 GN=galS         |
| P21338     | rna    | 0.625285902          | Ribonuclease I OS=Escherichia coli O6 GN=rna                                             |
| P0AFX9     | rseB   | 0.626054454          | Sigma-E factor Regulatory protein rseB OS=Escherichia coli O6 GN=rseB                    |
| P0A7R9     | rpsK   | 0.626878528          | 30S ribosomal protein S11 OS=Escherichia coli O6 GN=rpsK                                 |
| P0ADT8     | ygiM   | 0.627438586          | Uncharacterized protein ygiM OS=Escherichia coli O6 GN=ygiM                              |
| P61175     | rplV   | 0.630906626          | 50S ribosomal protein L22 OS=Escherichia coli O6 GN=rplV                                 |
| P0ABH7     | glcA   | 0.635481267          | Citrate synthase OS=Escherichia coli O6 GN=glcA                                          |
| P0A7U3     | rpsS   | 0.637803671          | 30S ribosomal protein S19 OS=Escherichia coli O6 GN=rpsS                                 |
| P0AE08     | ahpC   | 0.638620185          | Alkyl hydroperoxide reductase subunit C OS=Escherichia coli O6 GN=ahpC                   |
| P27302     | tktA   | 0.638857725          | Transketolase 1 OS=Escherichia coli O6 GN=tktA                                           |
| P0A7V8     | rpsD   | 0.642526009          | 30S ribosomal protein S4 OS=Escherichia coli O6 GN=rpsD                                  |
| O07813     | leuS   | 0.643824658          | Leucyl-tRNA synthetase OS=Escherichia coli O6 GN=leuS                                    |
| P0ADU2     | ygiN   | 0.643856177          | Protein ygiN OS=Escherichia coli O6 GN=ygiN                                              |
| A0A0H2V9J3 | c2988  | 0.647027441          | NADP-dependent malic enzyme OS=Escherichia coli O6 GN=c2988                              |
| P0A6Y8     | dnaK   | 0.648021908          | Chaperone protein dnaK OS=Escherichia coli O6 GN=dnaK                                    |
| P76585     | yphG   | 0.650806481          | Putative uncharacterized protein yphG OS=Escherichia coli O6 GN=yphG                     |
| P0AG55     | rplF   | 0.656873919          | 50S ribosomal protein L6 OS=Escherichia coli O6 GN=rplF                                  |
| P21170     | speA   | 0.660402504          | Biosynthetic arginine decarboxylase OS=Escherichia coli O6 GN=speA                       |
| P23538     | ppsA   | 0.660661901          | Phosphoenolpyruvate synthase OS=Escherichia coli O6 GN=ppsA                              |
| P0AEU7     | skp    | 0.660950999          | Chaperone protein skp OS=Escherichia coli O6 GN=skp                                      |
| P13029     | katG   | 0.670756615          | Catalase-peroxidase OS=Escherichia coli O6 GN=katG                                       |
| P60422     | rplB   | 0.680953211          | 50S ribosomal protein L2 OS=Escherichia coli O6 GN=rplB                                  |
| P09372     | grpE   | 0.681984559          | Protein grpE OS=Escherichia coli O6 GN=grpE                                              |
| P0A6Z3     | htpG   | 0.682302999          | Chaperone protein htpG OS=Escherichia coli O6 GN=htpG                                    |
| A0A0H2VAF4 | c3429  | 0.684052632          | Tas protein OS=Escherichia coli O6 GN=c3429                                              |



| Uniprot ID | Symbol | TMT ratio (high/low) | Protein description                                                              |
|------------|--------|----------------------|----------------------------------------------------------------------------------|
| P0A8M3     | thrS   | 0.687479254          | Threonyl-tRNA synthetase OS=Escherichia coli O6 GN=thrS                          |
| P77674     | prp    | 0.689640304          | Gamma-aminobutyraldehyde dehydrogenase OS=Escherichia coli O6 GN=prp             |
| P0A7S3     | rpsL   | 0.692856654          | 30S ribosomal protein S12 OS=Escherichia coli O6 GN=rpsL                         |
| P0A9G6     | aceA   | 0.693271439          | Isocitrate lyase OS=Escherichia coli O6 GN=aceA                                  |
| P0A7W1     | rpsE   | 0.694248544          | 30S ribosomal protein S5 OS=Escherichia coli O6 GN=rpsE                          |
| P07102     | appA   | 0.694668215          | Periplasmic appA protein OS=Escherichia coli O6 GN=appA                          |
| P0ABA0     | atpF   | 0.699665616          | ATP synthase subunit b OS=Escherichia coli O6 GN=atpF                            |
| P0A9M5     | gpt    | 0.70138689           | Xanthine phosphoribosyltransferase OS=Escherichia coli O6 GN=gpt                 |
| P00962     | glnS   | 0.701862537          | Glutamyl-tRNA synthetase OS=Escherichia coli O6 GN=glnS                          |
| P76116     | yncE   | 0.703267036          | Putative uncharacterized protein yncE OS=Escherichia coli O6 GN=yncE             |
| P0ABJ1     | cyoA   | 0.703493686          | Ubiquinol oxidase subunit 2 OS=Escherichia coli O6 GN=cyoA                       |
| P0C0V0     | htrA   | 0.703965607          | Protease do OS=Escherichia coli O6 GN=htrA                                       |
| P06149     | dld    | 0.706779871          | D-lactate dehydrogenase OS=Escherichia coli O6 GN=dld                            |
| P27306     | sthA   | 0.708286187          | Soluble pyridine nucleotide transhydrogenase OS=Escherichia coli O6 GN=sthA      |
| P0AEQ3     | glnH   | 0.71017556           | Glutamine-binding periplasmic protein OS=Escherichia coli O6 GN=glnH             |
| P00968     | carB   | 0.7104931            | Carbamoyl-phosphate synthase large chain OS=Escherichia coli O6 GN=carB          |
| P0AAB8     | uspD   | 0.711926435          | Universal stress protein D OS=Escherichia coli O6 GN=uspD                        |
| P0A8T7     | rpoC   | 0.712613552          | DNA-directed RNA polymerase subunit beta; OS=Escherichia coli O6 GN=rpoC         |
| P05042     | fumC   | 0.715274137          | Fumarate hydratase class II OS=Escherichia coli O6 GN=fumC                       |
| P0ACJ8     | crp    | 0.717747691          | Catabolite gene activator OS=Escherichia coli O6 GN=crp                          |
| P0AEU0     | hisJ   | 0.725252308          | Histidine-binding periplasmic protein OS=Escherichia coli O6 GN=hisJ             |
| P33195     | gcvP   | 0.727304286          | Glycine dehydrogenase [decarboxylating] OS=Escherichia coli O6 GN=gcvP           |
| P0AFK9     | potD   | 0.727939385          | Spermidine/putrescine-binding periplasmic protein OS=Escherichia coli O6 GN=potD |
| P00959     | metG   | 0.728299492          | Methionyl-tRNA synthetase OS=Escherichia coli O6 GN=metG                         |
| P0AB89     | purB   | 0.73003569           | Adenylosuccinate lyase OS=Escherichia coli O6 GN=purB                            |
| P0AGD3     | sodB   | 0.730390474          | Superoxide dismutase [Fe] OS=Escherichia coli O6 GN=sodB                         |
| P04825     | pepN   | 0.733199388          | Aminopeptidase N OS=Escherichia coli O6 GN=pepN                                  |
| P31979     | nuoF   | 0.734633513          | NADH dehydrogenase I chain F OS=Escherichia coli O6 GN=nuoF                      |
| P0AFG3     | sucA   | 0.73556176           | 2-oxoglutarate dehydrogenase E1 component OS=Escherichia coli O6 GN=sucA         |

| Uniprot ID | Symbol | TMT ratio (high/low) | Protein description                                                                                       |
|------------|--------|----------------------|-----------------------------------------------------------------------------------------------------------|
| P10408     | secA   | 0.7409409            | Protein translocase subunit secA OS=Escherichia coli O6 GN=secA                                           |
| P60723     | rplD   | 0.74220412           | 50S ribosomal protein L4 OS=Escherichia coli O6 GN=rplD                                                   |
| P76193     | ynhG   | 0.743256207          | Putative uncharacterized protein ynhG OS=Escherichia coli O6 GN=ynhG                                      |
| P21599     | pykA   | 0.743297232          | Pyruvate kinase II OS=Escherichia coli O6 GN=pykA                                                         |
| P0C018     | rplR   | 0.746246012          | 50S ribosomal protein L18 OS=Escherichia coli O6 GN=rplR                                                  |
| P00926     | dsdA   | 0.748758236          | D-serine dehydratase OS=Escherichia coli O6 GN=dsdA                                                       |
| P11875     | argS   | 0.751127857          | Arginyl-tRNA synthetase OS=Escherichia coli O6 GN=argS                                                    |
| P67910     | hldD   | 0.752979613          | ADP-L-glycero-D-manno-heptose-6-epimerase OS=Escherichia coli O6 GN=hldD                                  |
| P40120     | mdoD   | 0.754877336          | Glucans biosynthesis protein D OS=Escherichia coli O6 GN=mdoD                                             |
| P15288     | pepD   | 0.757459166          | Aminoacyl-histidine dipeptidase OS=Escherichia coli O6 GN=pepD                                            |
| P0A9J8     | pheA   | 0.758013669          | P-protein OS=Escherichia coli O6 GN=pheA                                                                  |
| P00960     | glyQ   | 0.759829126          | Glycyl-tRNA synthetase alpha subunit OS=Escherichia coli O6 GN=glyQ                                       |
| P24182     | accC   | 0.760093446          | Biotin carboxylase OS=Escherichia coli O6 GN=accC                                                         |
| Q06902     | pepA   | 0.762522719          | Cytosol aminopeptidase OS=Escherichia coli O6 GN=pepA                                                     |
| A0A0H2V5Y8 | c1138  | 0.763337675          | Putative uncharacterized protein OS=Escherichia coli O6 GN=c1138                                          |
| P0A9D4     | cysE   | 0.764669677          | Serine acetyltransferase OS=Escherichia coli O6 GN=cysE                                                   |
| P39377     | iadA   | 0.766158102          | Isoaspartyl dipeptidase OS=Escherichia coli O6 GN=iadA                                                    |
| P21177     | fadB   | 0.76634442           | Fatty acid oxidation complex subunit alpha OS=Escherichia coli O6 GN=fadB                                 |
| P0AES4     | gyrA   | 0.769041633          | DNA gyrase subunit A OS=Escherichia coli O6 GN=gyrA                                                       |
| P37773     | yjfg   | 0.771496548          | UDP-N-acetylmuramate:L-alanyl-gamma-D-glutamyl-meso-diaminopimelate ligase OS=Escherichia coli O6 GN=yjfg |
| P24215     | uxuA   | 0.77243237           | Mannonate dehydratase OS=Escherichia coli O6 GN=uxuA                                                      |
| P0A8V2     | rpoB   | 0.772807268          | DNA-directed RNA polymerase subunit beta OS=Escherichia coli O6 GN=rpoB                                   |
| P63284     | clpB   | 0.773016487          | Chaperone protein ClpB OS=Escherichia coli O6 GN=clpB                                                     |
| P0A8W8     | yfbU   | 0.773723193          | UPF0304 protein yfbU OS=Escherichia coli O6 GN=yfbU                                                       |
| P77739     | yniA   | 0.774007572          | Putative uncharacterized protein yniA OS=Escherichia coli O6 GN=yniA                                      |
| P25539     | ribD   | 0.77563834           | Riboflavin biosynthesis protein ribD OS=Escherichia coli O6 GN=ribD                                       |
| P0A9B2     | gapA   | 0.775683823          | Glyceraldehyde-3-phosphate dehydrogenase A OS=Escherichia coli O6 GN=gapA                                 |
| P16659     | proS   | 0.777056557          | Prolyl-tRNA synthetase OS=Escherichia coli O6 GN=proS                                                     |
| P0ADY3     | rplN   | 0.779454544          | 50S ribosomal protein L14 OS=Escherichia coli O6 GN=rplN                                                  |

| Uniprot ID | Symbol | TMT ratio (high/low) | Protein description                                                              |
|------------|--------|----------------------|----------------------------------------------------------------------------------|
| P37648     | yhjJ   | 0.77979622           | Protein yhjJ OS=Escherichia coli O6 GN=yhjJ                                      |
| P33570     | tktB   | 0.781441342          | Transketolase 2 OS=Escherichia coli O6 GN=tktB                                   |
| P0AE06     | acrA   | 0.781449646          | Acriflavine resistance protein A OS=Escherichia coli O6 GN=acrA                  |
| P00956     | ileS   | 0.783119014          | Isoleucyl-tRNA synthetase OS=Escherichia coli O6 GN=ileS                         |
| P31120     | glmM   | 0.783533716          | Phosphoglucosamine mutase OS=Escherichia coli O6 GN=glmM                         |
| P25526     | gabD   | 0.784688333          | Succinate-semialdehyde dehydrogenase (NADP+) OS=Escherichia coli O6 GN=gabD      |
| P0AG51     | rpmD   | 0.785590525          | 50S ribosomal protein L30 OS=Escherichia coli O6 GN=rpmD                         |
| A0A0H2VF72 | c5312  | 0.785798066          | Putative conserved protein OS=Escherichia coli O6 GN=c5312                       |
| P21889     | aspS   | 0.78715046           | Aspartyl-tRNA synthetase OS=Escherichia coli O6 GN=aspS                          |
| P0A6T5     | folE   | 0.787823323          | GTP cyclohydrolase 1 OS=Escherichia coli O6 GN=folE                              |
| P0A7K6     | rplS   | 0.788062358          | 50S ribosomal protein L19 OS=Escherichia coli O6 GN=rplS                         |
| P0A9J6     | rbsK   | 0.78936314           | Ribokinase OS=Escherichia coli O6 GN=rbsK                                        |
| Q46871     | yqjH   | 0.790793522          | Putative uncharacterized protein yqjH OS=Escherichia coli O6 GN=yqjH             |
| P0A6W5     | greA   | 0.791893557          | Transcription elongation factor greA OS=Escherichia coli O6 GN=greA              |
| Q55BF4     | ucpA   | 0.792487507          | Oxidoreductase ucpA OS=Escherichia coli O6 GN=ucpA                               |
| P0A8F0     | upp    | 0.794111207          | Uracil phosphoribosyltransferase OS=Escherichia coli O6 GN=upp                   |
| P0AFG8     | aceE   | 0.795551463          | Pyruvate dehydrogenase E1 component OS=Escherichia coli O6 GN=aceE               |
| P0A7V3     | rpsC   | 0.795594541          | 30S ribosomal protein S3 OS=Escherichia coli O6 GN=rpsC                          |
| P21513     | rne    | 0.795666105          | Ribonuclease E OS=Escherichia coli O6 GN=rne                                     |
| P07004     | proA   | 0.796219782          | Gamma-glutamyl phosphate reductase OS=Escherichia coli O6 GN=proA                |
| P0C8J8     | gatZ   | 0.796511401          | D-tagatose-1,6-bisphosphate aldolase subunit gatZ OS=Escherichia coli O6 GN=gatZ |
| P0AG30     | rho    | 0.80074555           | Transcription termination factor Rho OS=Escherichia coli O6 GN=rho               |
| P0AG67     | rpsA   | 0.801305131          | 30S ribosomal protein S1 OS=Escherichia coli O6 GN=rpsA                          |
| P0AD61     | pykF   | 0.80441438           | Pyruvate kinase I OS=Escherichia coli O6 GN=pykF                                 |
| P46853     | yhhX   | 0.806185211          | Putative oxidoreductase yhhX OS=Escherichia coli O6 GN=yhhX                      |
| A0A0H2V4R2 | c0460  | 0.806575512          | LacI protein OS=Escherichia coli O6 GN=c0460                                     |
| P77269     | yphF   | 0.806675162          | ABC transporter Periplasmic binding protein yphF OS=Escherichia coli O6 GN=yphF  |
| P0A698     | uvrA   | 0.807359898          | UvrABC system protein A OS=Escherichia coli O6 GN=uvrA                           |

| Uniprot ID | Symbol | TMT ratio (high/low) | Protein description                                                                                        |
|------------|--------|----------------------|------------------------------------------------------------------------------------------------------------|
| P0A6F5     | groL   | 0.807955827          | 60 kDa chaperonin OS=Escherichia coli O6 GN=groL                                                           |
| P0A6F9     | groS   | 0.8083466            | 10 kDa chaperonin OS=Escherichia coli O6 GN=groS                                                           |
| P0AFY8     | seqA   | 0.808743547          | Protein seqA OS=Escherichia coli O6 GN=seqA                                                                |
| P15977     | malQ   | 0.809482834          | 4-alpha-glucanotransferase OS=Escherichia coli O6 GN=malQ                                                  |
| P42641     | obg    | 0.811559254          | GTPase obg OS=Escherichia coli O6 GN=obg                                                                   |
| P29745     | pepT   | 0.811917558          | Peptidase T OS=Escherichia coli O6 GN=pepT                                                                 |
| P08997     | aceB   | 0.812554028          | Malate synthase A OS=Escherichia coli O6 GN=aceB                                                           |
| P0A850     | tig    | 0.818739487          | Trigger factor OS=Escherichia coli O6 GN=tig                                                               |
| P0A8M0     | asnS   | 0.820188588          | AsparaginyI-tRNA synthetase OS=Escherichia coli O6 GN=asnS                                                 |
| P25665     | metE   | 0.821710075          | 5-methyltetrahydropteroyltrimethylglutamate--homocysteine methyltransferase OS=Escherichia coli O6 GN=metE |
| P0ADR8     | ygdH   | 0.821737193          | LOG family protein ygdH OS=Escherichia coli O6 GN=ygdH                                                     |
| Q54GJ2     | purD   | 0.821855673          | Phosphoribosylamine--glycine ligase OS=Escherichia coli O6 GN=purD                                         |
| P0AE91     | creA   | 0.822613284          | Protein CreA OS=Escherichia coli O6 GN=creA                                                                |
| P60438     | rplC   | 0.824145615          | 50S ribosomal protein L3 OS=Escherichia coli O6 GN=rplC                                                    |
| P0A794     | pdxJ   | 0.824875598          | Pyridoxine 5&#039;-phosphate synthase OS=Escherichia coli O6 GN=pdxJ                                       |
| P08390     | usg    | 0.826105303          | USG-1 protein OS=Escherichia coli O6 GN=usg                                                                |
| P39160     | uxuB   | 0.826454387          | D-mannonate oxidoreductase OS=Escherichia coli O6 GN=uxuB                                                  |
| P0AF03     | mog    | 0.829639561          | Molybdopterin biosynthesis mog protein OS=Escherichia coli O6 GN=mog                                       |
| P0A6P7     | engB   | 0.833367385          | Probable GTP-binding protein engB OS=Escherichia coli O6 GN=engB                                           |
| P76108     | ydcS   | 0.833835947          | Putative ABC transporter Periplasmic binding protein ydcS OS=Escherichia coli O6 GN=ydcS                   |
| P45565     | ais    | 0.836435444          | Lipopolysaccharide core heptose(II)-phosphate phosphatase OS=Escherichia coli O6 GN=ais                    |
| P23839     | yicC   | 0.836567165          | Protein yicC OS=Escherichia coli O6 GN=yicC                                                                |
| P77398     | arnA   | 0.838774461          | Bifunctional polymyxin resistance protein ArnA OS=Escherichia coli O6 GN=arnA                              |
| P00579     | rpoD   | 0.8400357            | RpoD protein OS=Escherichia coli O6 GN=rpoD                                                                |
| P0AGE9     | sucD   | 0.840335313          | Succinyl-CoA ligase [ADP-forming] subunit alpha OS=Escherichia coli O6 GN=sucD                             |
| P15254     | purL   | 0.841520453          | Phosphoribosylformylglycinamide synthase OS=Escherichia coli O6 GN=purL                                    |
| P0A991     | fbaB   | 0.845307973          | Fructose-bisphosphate aldolase class 1 OS=Escherichia coli O6 GN=fbaB                                      |
| P0AG90     | secD   | 0.848169739          | Protein-export membrane protein secD OS=Escherichia coli O6 GN=secD                                        |

| Uniprot ID | Symbol | TMT ratio (high/low) | Protein description                                                           |
|------------|--------|----------------------|-------------------------------------------------------------------------------|
| P0A9P0     | lpdA   | 0.850458589          | Dihydrolipoyl dehydrogenase OS=Escherichia coli O6 GN=lpdA                    |
| P69776     | lpp    | 0.850666202          | Major outer membrane lipoprotein OS=Escherichia coli O6 GN=lpp                |
| P22256     | gabT   | 0.854200489          | 4-aminobutyrate aminotransferase OS=Escherichia coli O6 GN=gabT               |
| W8ZQY3     | yijP   | 0.855350971          | Protein yijP OS=Escherichia coli O6 GN=yijP                                   |
| P08839     | ptsI   | 0.860492767          | Phosphoenolpyruvate-protein phosphotransferase OS=Escherichia coli O6 GN=ptsI |
| P33136     | mdoG   | 0.860525644          | Glucans biosynthesis protein G OS=Escherichia coli O6 GN=mdoG                 |
| W8ZVD2     | hisS   | 0.861425217          | Histidyl-tRNA synthetase OS=Escherichia coli O6 GN=hisS                       |
| P63224     | gmhA   | 0.862072031          | Phosphoheptose isomerase OS=Escherichia coli O6 GN=gmhA                       |
| P27550     | acs    | 0.863260143          | Acetyl-coenzyme A synthetase OS=Escherichia coli O6 GN=acs                    |
| P31663     | panC   | 0.863925006          | Pantothenate synthetase OS=Escherichia coli O6 GN=panC                        |
| P33599     | nuoC   | 0.864562569          | NADH-quinone oxidoreductase subunit C/D OS=Escherichia coli O6 GN=nuoC        |
| P27298     | prfC   | 0.866535001          | Oligopeptidase A OS=Escherichia coli O6 GN=prfC                               |
| P15639     | putH   | 0.869232714          | Bifunctional purine biosynthesis protein purH OS=Escherichia coli O6 GN=purH  |
| P35340     | ahpF   | 0.869589115          | Alkyl hydroperoxide reductase subunit F OS=Escherichia coli O6 GN=ahpF        |
| P0ADG7     | guaB   | 0.86983954           | Inosine-5-&#039;-monophosphate dehydrogenase OS=Escherichia coli O6 GN=guaB   |
| P0ACB7     | hemY   | 0.87711997           | Protein hemY OS=Escherichia coli O6 GN=hemY                                   |
| P21499     | vacB   | 0.877362497          | Ribonuclease R OS=Escherichia coli O6 GN=vacB                                 |
| P0A7R1     | rplI   | 0.877478269          | 50S ribosomal protein L9 OS=Escherichia coli O6 GN=rplI                       |
| P0AB77     | kbl    | 0.877927709          | 2-amino-3-ketobutyrate coenzyme A ligase OS=Escherichia coli O6 GN=kbl        |
| P0AGD7     | ffh    | 0.879227228          | Signal recognition particle protein OS=Escherichia coli O6 GN=ffh             |
| P33232     | lldD   | 0.88084775           | L-lactate dehydrogenase [cytochrome] OS=Escherichia coli O6 GN=lldD           |
| P0AE88     | cpxR   | 0.884613141          | Transcriptional Regulatory protein cpxR OS=Escherichia coli O6 GN=cpxR        |
| P39099     | degQ   | 0.884826584          | Protease degQ OS=Escherichia coli O6 GN=degQ                                  |
| P04425     | gshB   | 0.886001136          | Glutathione synthetase OS=Escherichia coli O6 GN=gshB                         |
| P28304     | qor    | 0.887158917          | Quinone oxidoreductase OS=Escherichia coli O6 GN=qor                          |
| P00363     | frdA   | 0.887703171          | Fumarate reductase flavoprotein subunit OS=Escherichia coli O6 GN=frdA        |
| P08660     | lysC   | 0.887722498          | Lysine-sensitive aspartokinase III OS=Escherichia coli O6 GN=lysC             |
| P0A7L0     | rplA   | 0.887779567          | 50S ribosomal protein L1 OS=Escherichia coli O6 GN=rplA                       |
| P0A6W9     | gshA   | 0.889010407          | Glutamate-cysteine ligase OS=Escherichia coli O6 GN=gshA                      |

| Uniprot ID | Symbol | TMT ratio (high/low) | Protein description                                                                 |
|------------|--------|----------------------|-------------------------------------------------------------------------------------|
| P08506     | dacC   | 0.892327243          | Penicillin-binding protein 6 OS=Escherichia coli O6 GN=dacC                         |
| P07118     | valS   | 0.89235814           | Valyl-tRNA synthetase OS=Escherichia coli O6 GN=valS                                |
| P0AAI5     | fabF   | 0.894683526          | 3-oxoacyl-[acyl-carrier-protein] synthase 2 OS=Escherichia coli O6 GN=fabF          |
| P0A9S5     | gldA   | 0.895697626          | Glycerol dehydrogenase OS=Escherichia coli O6 GN=gldA                               |
| P0ABA6     | atpG   | 0.896572752          | ATP synthase gamma chain OS=Escherichia coli O6 GN=atpG                             |
| P23882     | fmt    | 0.897478847          | Methionyl-tRNA formyltransferase OS=Escherichia coli O6 GN=fmt                      |
| P00961     | glyS   | 0.900945515          | Glycyl-tRNA synthetase beta subunit OS=Escherichia coli O6 GN=glyS                  |
| P0A6Q3     | fabA   | 0.902619409          | 3-hydroxydecanoyl-[acyl-carrier-protein] dehydratase OS=Escherichia coli O6 GN=fabA |
| P0A6L2     | dapA   | 0.902995333          | Dihydrodipicolinate synthase OS=Escherichia coli O6 GN=dapA                         |
| P0A905     | slyB   | 0.903518669          | Outer membrane lipoprotein slyB OS=Escherichia coli O6 GN=slyB                      |
| P15034     | pepP   | 0.90737064           | Xaa-Pro aminopeptidase OS=Escherichia coli O6 GN=pepP                               |
| P0ACA7     | yliJ   | 0.909305467          | Uncharacterized GST-like protein yliJ OS=Escherichia coli O6 GN=yliJ                |
| P77581     | astC   | 0.909890378          | Succinylornithine transaminase OS=Escherichia coli O6 GN=astC                       |
| P33602     | nuoG   | 0.912911733          | NADH-quinone oxidoreductase subunit G OS=Escherichia coli O6 GN=nuoG                |
| P0ABB0     | atpA   | 0.912998743          | ATP synthase subunit alpha OS=Escherichia coli O6 GN=atpA                           |
| P31142     | sseA   | 0.914032308          | 3-mercaptopyruvate sulfurtransferase OS=Escherichia coli O6 GN=sseA                 |
| W8ZP47     | tdcE   | 0.915973351          | Keto-acid formate acetyltransferase OS=Escherichia coli O6 GN=tdcE                  |
| P0A796     | pfkA   | 0.916474708          | 6-phosphofructokinase OS=Escherichia coli O6 GN=pfkA                                |
| P04036     | dapB   | 0.916931303          | Dihydrodipicolinate reductase OS=Escherichia coli O6 GN=dapB                        |
| P0ACC7     | glmU   | 0.919559384          | Bifunctional protein glmU OS=Escherichia coli O6 GN=glmU                            |
| P04693     | tyrB   | 0.920135759          | Aromatic-amino-acid aminotransferase OS=Escherichia coli O6 GN=tyrB                 |
| P09831     | gltB   | 0.920455414          | Glutamate synthase [NADPH] large chain OS=Escherichia coli O6 GN=gltB               |
| P0AG63     | rpsQ   | 0.9224248            | 30S ribosomal protein S17 OS=Escherichia coli O6 GN=rpsQ                            |
| P0A8Y8     | ybdB   | 0.922982921          | Esterase YbdB OS=Escherichia coli O6 GN=ybdB                                        |
| P0A9M2     | hpt    | 0.923137682          | Hypoxanthine phosphoribosyltransferase OS=Escherichia coli O6 GN=hpt                |
| P10121     | ftsY   | 0.924331817          | Cell division protein ftsY OS=Escherichia coli O6 GN=ftsY                           |
| P31057     | panB   | 0.925718182          | 3-methyl-2-oxobutanoate hydroxymethyltransferase OS=Escherichia coli O6 GN=panB     |
| P69797     | manX   | 0.925803798          | PTS system mannose-specific EIIAB component OS=Escherichia coli O6 GN=manX          |

| Uniprot ID | Symbol | TMT ratio (high/low) | Protein description                                                                           |
|------------|--------|----------------------|-----------------------------------------------------------------------------------------------|
| P05055     | pnp    | 0.926533686          | Polyribonucleotide nucleotidyltransferase OS=Escherichia coli O6 GN=pnp                       |
| P09546     | putA   | 0.927023588          | PutA protein OS=Escherichia coli O6 GN=putA                                                   |
| P61714     | ribE   | 0.927606024          | Riboflavin synthase alpha chain OS=Escherichia coli O6 GN=ribE                                |
| P37095     | pepB   | 0.928106268          | Peptidase B OS=Escherichia coli O6 GN=pepB                                                    |
| P21888     | cysS   | 0.928643149          | Cysteinyl-tRNA synthetase OS=Escherichia coli O6 GN=cysS                                      |
| P0A6A3     | ackA   | 0.930446025          | Acetate kinase OS=Escherichia coli O6 GN=ackA                                                 |
| P0A7C6     | pepE   | 0.931268242          | Peptidase E OS=Escherichia coli O6 GN=pepE                                                    |
| P23893     | hemL   | 0.931289677          | Glutamate-1-semialdehyde 2,1-aminomutase OS=Escherichia coli O6 GN=hemL                       |
| Q46832     | yqhD   | 0.932903576          | Hypothetical oxidoreductase yqhD OS=Escherichia coli O6 GN=yqhD                               |
| P0A705     | infB   | 0.935333255          | Translation initiation factor IF-2 OS=Escherichia coli O6 GN=infB                             |
| P0ABA4     | atpH   | 0.935912013          | ATP synthase subunit delta OS=Escherichia coli O6 GN=atpH                                     |
| P60390     | rsmH   | 0.936294146          | Ribosomal RNA small subunit methyltransferase H OS=Escherichia coli O6 GN=rsmH                |
| W8ZMW8     | yahK   | 0.936643232          | Hypothetical zinc-type alcohol dehydrogenase-like protein yahK OS=Escherichia coli O6 GN=yahK |
| P61517     | yadF   | 0.938096588          | Protein yadF OS=Escherichia coli O6 GN=yadF                                                   |
| P08312     | pheS   | 0.939150627          | Phenylalanyl-tRNA synthetase alpha chain OS=Escherichia coli O6 GN=pheS                       |
| W8ZG19     | tolB   | 0.93966195           | Protein tolB OS=Escherichia coli O6 GN=tolB                                                   |
| P0AEB2     | dacA   | 0.940455445          | D-alanyl-D-alanine carboxypeptidase dacA OS=Escherichia coli O6 GN=dacA                       |
| P64429     | ypfJ   | 0.941246386          | Uncharacterized protein ypfJ OS=Escherichia coli O6 GN=ypfJ                                   |
| P11447     | argH   | 0.941382958          | Argininosuccinate lyase OS=Escherichia coli O6 GN=argH                                        |
| P36938     | pgm    | 0.941520311          | Phosphoglucomutase OS=Escherichia coli O6 GN=pgm                                              |
| P06612     | topA   | 0.945504618          | DNA topoisomerase I OS=Escherichia coli O6 GN=topA                                            |
| P39286     | rsgA   | 0.947770826          | Putative ribosome biogenesis GTPase RsgA OS=Escherichia coli O6 GN=rsgA                       |
| P0A6S7     | gpsA   | 0.949036509          | Glycerol-3-phosphate dehydrogenase [NAD(P)+] OS=Escherichia coli O6 GN=gpsA                   |
| P21165     | pepQ   | 0.949797485          | Xaa-Pro dipeptidase OS=Escherichia coli O6 GN=pepQ                                            |
| P0A870     | talB   | 0.952714393          | Transaldolase B OS=Escherichia coli O6 GN=talB                                                |
| P25553     | aldA   | 0.952922731          | Aldehyde dehydrogenase A OS=Escherichia coli O6 GN=aldA                                       |
| P37300     | glcB   | 0.9536358            | Malate synthase G OS=Escherichia coli O6 GN=glcB                                              |
| P30177     | ybiB   | 0.954735948          | Putative uncharacterized protein ybiB OS=Escherichia coli O6 GN=ybiB                          |

| Uniprot ID | Symbol | TMT ratio (high/low) | Protein description                                                                            |
|------------|--------|----------------------|------------------------------------------------------------------------------------------------|
| P00954     | trpS   | 0.956054489          | Tryptophanyl-tRNA synthetase OS=Escherichia coli O6 GN=trpS                                    |
| P0A7J3     | rplJ   | 0.961369923          | 50S ribosomal protein L10 OS=Escherichia coli O6 GN=rplJ                                       |
| P0A9W3     | yjjK   | 0.961444369          | ABC transporter ATP-binding protein yjjK OS=Escherichia coli O6 GN=yjjK                        |
| P0A7S9     | rpsM   | 0.963139285          | 30S ribosomal protein S13 OS=Escherichia coli O6 GN=rpsM                                       |
| P07395     | pheT   | 0.965128887          | Phenylalanyl-tRNA synthetase beta chain OS=Escherichia coli O6 GN=pheT                         |
| P69922     | fucl   | 0.965980887          | L-fucose isomerase OS=Escherichia coli O6 GN=fucl                                              |
| P0ABP8     | deoD   | 0.966982681          | Purine nucleoside phosphorylase deoD-type OS=Escherichia coli O6 GN=deoD                       |
| P00509     | aspC   | 0.967598105          | Aspartate aminotransferase OS=Escherichia coli O6 GN=aspC                                      |
| P17117     | mdaA   | 0.968077201          | Oxygen-insensitive NADPH nitroreductase OS=Escherichia coli O6 GN=mdaA                         |
| P76015     | ycgT   | 0.969265941          | Putative uncharacterized protein ycgT OS=Escherichia coli O6 GN=ycgT                           |
| P23865     | prc    | 0.969719177          | Tail-specific protease OS=Escherichia coli O6 GN=prc                                           |
| P0A7T3     | rpsP   | 0.969823499          | 30S ribosomal protein S16 OS=Escherichia coli O6 GN=rpsP                                       |
| P0A9Q5     | accD   | 0.97288678           | Acetyl-coenzyme A carboxylase carboxyl transferase subunit beta OS=Escherichia coli O6 GN=accD |
| W8ZMK5     | tbpA   | 0.973981302          | Thiamine-binding periplasmic protein OS=Escherichia coli O6 GN=tbpA                            |
| W8ZE39     | yaiE   | 0.975849051          | UPF0345 protein yaiE OS=Escherichia coli O6 GN=yaiE                                            |
| P0A6U5     | rsmG   | 0.976420644          | Ribosomal RNA small subunit methyltransferase G OS=Escherichia coli O6 GN=rsmG                 |
| P0ADW3     | yhcB   | 0.977766582          | Putative cytochrome d ubiquinol oxidase subunit 3 OS=Escherichia coli O6 GN=yhcB               |
| P0ADY1     | ppiD   | 0.978234667          | Peptidyl-prolyl cis-trans isomerase D OS=Escherichia coli O6 GN=ppiD                           |
| P29680     | hemE   | 0.980104973          | Uroporphyrinogen decarboxylase OS=Escherichia coli O6 GN=hemE                                  |
| P04805     | glxX   | 0.980712534          | Glutamyl-tRNA synthetase OS=Escherichia coli O6 GN=glxX                                        |
| P0ABZ6     | surA   | 0.980945947          | Chaperone surA OS=Escherichia coli O6 GN=surA                                                  |
| P0A836     | sucC   | 0.982058681          | Succinyl-CoA ligase [ADP-forming] subunit beta OS=Escherichia coli O6 GN=sucC                  |
| P0AFC7     | nuoB   | 0.98244466           | NADH-quinone oxidoreductase subunit B OS=Escherichia coli O6 GN=nuoB                           |
| P0AEH5     | elaB   | 0.983452694          | Protein elaB OS=Escherichia coli O6 GN=elaB                                                    |
| P62768     | yaeH   | 0.984550969          | UPF0325 protein yaeH OS=Escherichia coli O6 GN=yaeH                                            |
| P08179     | purN   | 0.987225634          | Phosphoribosylglycinamide formyltransferase OS=Escherichia coli O6 GN=purN                     |
| P0AFF6     | nusA   | 0.987744113          | Transcription elongation protein nusA OS=Escherichia coli O6 GN=nusA                           |
| P77690     | arnB   | 0.98837784           | UDP-4-amino-4-deoxy-L-arabinose--oxoglutarate aminotransferase OS=Escherichia coli O6 GN=arnB  |



| Uniprot ID | Symbol | TMT ratio (high/low) | Protein description                                                                                  |
|------------|--------|----------------------|------------------------------------------------------------------------------------------------------|
| P09029     | purK   | 0.988771664          | Phosphoribosylaminoimidazole carboxylase ATPase subunit OS=Escherichia coli O6 GN=purK               |
| P0A729     | yceF   | 0.989500545          | Maf-like protein yceF OS=Escherichia coli O6 GN=yceF                                                 |
| P39177     | uspG   | 0.993428204          | Universal stress protein G OS=Escherichia coli O6 GN=uspG                                            |
| P33607     | nuol   | 0.996187478          | NADH-quinone oxidoreductase subunit I OS=Escherichia coli O6 GN=nuol                                 |
| P14900     | murD   | 0.999337423          | UDP-N-acetylmuramoylalanine--D-glutamate ligase OS=Escherichia coli O6 GN=murD                       |
| P61889     | mdh    | 1.006453159          | Malate dehydrogenase OS=Escherichia coli O6 GN=mdh                                                   |
| P0A9D2     | gst    | 1.007004095          | Glutathione S-transferase OS=Escherichia coli O6 GN=gst                                              |
| P0ADI7     | yecD   | 1.007801805          | Hypothetical isochorismatase family protein yecD OS=Escherichia coli O6 GN=yecD                      |
| P18335     | argD   | 1.009648676          | Acetylornithine/succinyldiaminopimelate aminotransferase OS=Escherichia coli O6 GN=argD              |
| P0A7R5     | rpsJ   | 1.010256091          | 30S ribosomal protein S10 OS=Escherichia coli O6 GN=rpsJ                                             |
| P0A815     | trmB   | 1.011513364          | tRNA (guanine-N(7)-)-methyltransferase OS=Escherichia coli O6 GN=trmB                                |
| P05459     | pdxB   | 1.012337596          | Erythronate-4-phosphate dehydrogenase OS=Escherichia coli O6 GN=pdxB                                 |
| P0A6E4     | argG   | 1.014461809          | Argininosuccinate synthase OS=Escherichia coli O6 GN=argG                                            |
| P0A7DA     | purA   | 1.016111541          | Adenylosuccinate synthetase OS=Escherichia coli O6 GN=purA                                           |
| W8ZP84     | ybeJ   | 1.01855613           | Glutamate/aspartate Periplasmic binding protein OS=Escherichia coli O6 GN=ybeJ                       |
| P671714    | ribH   | 1.018820009          | 6,7-dimethyl-8-ribityllumazine synthase OS=Escherichia coli O6 GN=ribH                               |
| P0A722     | lpxA   | 1.020638181          | Acyl-[acyl-carrier-protein]-UDP-N-acetylglucosamine O-acyltransferase OS=Escherichia coli O6 GN=lpxA |
| P04079     | guaA   | 1.020681657          | GMP synthase [glutamine-hydrolyzing] OS=Escherichia coli O6 GN=guaA                                  |
| P77570     | anmK   | 1.021400487          | Anhydro-N-acetylmuramic acid kinase OS=Escherichia coli O6 GN=anmK                                   |
| W8ZRV6     | yjgB   | 1.022975714          | Hypothetical zinc-type alcohol dehydrogenase-like protein yjgB OS=Escherichia coli O6 GN=yjgB        |
| P62399     | rplE   | 1.023300229          | 50S ribosomal protein L5 OS=Escherichia coli O6 GN=rplE                                              |
| P27248     | gcvT   | 1.028005907          | Aminomethyltransferase OS=Escherichia coli O6 GN=gcvT                                                |
| W8ZWX3     | yhbL   | 1.031653727          | Enhancing lycopene biosynthesis protein 2 OS=Escherichia coli O6 GN=yhbL                             |
| P23847     | dppA   | 1.035093807          | Periplasmic dipeptide transport protein OS=Escherichia coli O6 GN=dppA                               |
| P06715     | gor    | 1.037345857          | Glutathione reductase OS=Escherichia coli O6 GN=gor                                                  |
| P0ADE8     | ygfZ   | 1.037370853          | tRNA-modifying protein ygfZ OS=Escherichia coli O6 GN=ygfZ                                           |
| P08014     | sdhB   | 1.038731272          | Succinate dehydrogenase iron-sulfur protein OS=Escherichia coli O6 GN=sdhB                           |
| P0AF18     | nagA   | 1.043415513          | N-acetylglucosamine-6-phosphate deacetylase OS=Escherichia coli O6 GN=nagA                           |

| Uniprot ID | Symbol | TMT ratio (high/low) | Protein description                                                            |
|------------|--------|----------------------|--------------------------------------------------------------------------------|
| P37647     | kdgK   | 1.044127534          | 2-dehydro-3-deoxygluconokinase OS=Escherichia coli O6 GN=kdgK                  |
| P0A7B5     | proB   | 1.045233065          | Glutamate 5-kinase OS=Escherichia coli O6 GN=proB                              |
| P63284     | clpP   | 1.047937215          | ATP-dependent Clp protease proteolytic subunit OS=Escherichia coli O6 GN=clpP  |
| P0A6K6     | deoB   | 1.05147249           | Phosphopentomutase OS=Escherichia coli O6 GN=deoB                              |
| P0A6Y1     | ihfB   | 1.052206468          | Integration host factor subunit beta OS=Escherichia coli O6 GN=ihfB            |
| P15047     | entA   | 1.054088783          | 2,3-dihydro-2,3-dihydroxybenzoate dehydrogenase OS=Escherichia coli O6 GN=entA |
| P77554     | yahJ   | 1.055136455          | Putative uncharacterized protein yahJ OS=Escherichia coli O6 GN=yahJ           |
| P0A7Z0     | rpiA   | 1.057994203          | Ribose-5-phosphate isomerase A OS=Escherichia coli O6 GN=rpiA                  |
| P52643     | ldhA   | 1.058046273          | D-lactate dehydrogenase OS=Escherichia coli O6 GN=ldhA                         |
| P05020     | pyrC   | 1.058459342          | Dihydroorotase OS=Escherichia coli O6 GN=pyrC                                  |
| P38489     | nfnB   | 1.058917586          | Oxygen-insensitive NAD(P)H nitroreductase OS=Escherichia coli O6 GN=nfnB       |
| P77804     | ydgA   | 1.059759662          | Putative uncharacterized protein ydgA OS=Escherichia coli O6 GN=ydgA           |
| Q47622     | sapA   | 1.063000875          | Peptide transport periplasmic protein sapA OS=Escherichia coli O6 GN=sapA      |
| P0ABT2     | dps    | 1.068866042          | DNA protection during starvation protein OS=Escherichia coli O6 GN=dps         |
| P0A6F1     | carA   | 1.073049893          | Carbamoyl-phosphate synthase small chain OS=Escherichia coli O6 GN=carA        |
| A0A0H2V4R7 | c0503  | 1.074074697          | Putative uncharacterized protein OS=Escherichia coli O6 GN=c0503               |
| P0A955     | eda    | 1.076935205          | KHG/KDPG aldolase OS=Escherichia coli O6 GN=eda                                |
| P04951     | kdsB   | 1.078539673          | 3-deoxy-manno-octulosonate cytidyltransferase OS=Escherichia coli O6 GN=kdsB   |
| P0A6C8     | argB   | 1.07862955           | Acetylglutamate kinase OS=Escherichia coli O6 GN=argB                          |
| P0A9K3     | ybeZ   | 1.079584655          | PhoH-like protein OS=Escherichia coli O6 GN=ybeZ                               |
| P0A799     | pgk    | 1.080827185          | Phosphoglycerate kinase OS=Escherichia coli O6 GN=pgk                          |
| P0A9Q1     | arcA   | 1.081859635          | Aerobic respiration control protein ArcA OS=Escherichia coli O6 GN=arcA        |
| P24186     | folD   | 1.083334017          | Bifunctional protein folD OS=Escherichia coli O6 GN=folD                       |
| W8ZS03     | infC   | 1.08464685           | Translation initiation factor IF-3 OS=Escherichia coli O6 GN=infC              |
| P00864     | ppc    | 1.08495912           | Phosphoenolpyruvate carboxylase OS=Escherichia coli O6 GN=ppc                  |
| P76658     | hldE   | 1.089520719          | Bifunctional protein hldE OS=Escherichia coli O6 GN=hldE                       |
| P0ACY1     | ydjA   | 1.090186871          | Protein ydjA OS=Escherichia coli O6 GN=ydjA                                    |
| P37903     | uspF   | 1.091911406          | Universal stress protein F OS=Escherichia coli O6 GN=uspF                      |
| P12758     | udp    | 1.092448608          | Uridine phosphorylase OS=Escherichia coli O6 GN=udp                            |

| Uniprot ID | Symbol | TMT ratio (high/low) | Protein description                                                                                                              |
|------------|--------|----------------------|----------------------------------------------------------------------------------------------------------------------------------|
| P0A7J7     | rpIK   | 1.096459357          | 50S ribosomal protein L11 OS=Escherichia coli O6 GN=rpIK                                                                         |
| P05825     | fepA   | 1.096608268          | Ferrienterobactin receptor OS=Escherichia coli O6 GN=fepA                                                                        |
| P0ABB4     | atpD   | 1.096795997          | ATP synthase subunit beta OS=Escherichia coli O6 GN=atpD                                                                         |
| P0A7Z4     | rpoA   | 1.098273771          | DNA-directed RNA polymerase subunit alpha OS=Escherichia coli O6 GN=rpoA                                                         |
| P0A9Q9     | asd    | 1.101047067          | Aspartate-semialdehyde dehydrogenase OS=Escherichia coli O6 GN=asd                                                               |
| P0ABC3     | hflC   | 1.101204735          | Protein HflC OS=Escherichia coli O6 GN=hflC                                                                                      |
| P0AAX8     | ybiS   | 1.102443569          | Probable L,D-transpeptidase YbiS OS=Escherichia coli O6 GN=ybiS                                                                  |
| P0A8L1     | serS   | 1.103783234          | Seryl-tRNA synthetase OS=Escherichia coli O6 GN=serS                                                                             |
| P45766     | yhdW   | 1.104801107          | Putative amino-acid ABC transporter binding protein yhdW OS=Escherichia coli O6 GN=yhdW                                          |
| P23869     | ppiB   | 1.105059669          | Peptidyl-prolyl cis-trans isomerase B OS=Escherichia coli O6 GN=ppiB                                                             |
| P0A9C5     | glnA   | 1.10645413           | Glutamine synthetase OS=Escherichia coli O6 GN=glnA                                                                              |
| P0AGJ9     | tyrS   | 1.10703438           | Tyrosyl-tRNA synthetase OS=Escherichia coli O6 GN=tyrS                                                                           |
| P0A6P1     | tsf    | 1.110916942          | Elongation factor Ts OS=Escherichia coli O6 GN=tsf                                                                               |
| A0A0H2VEA0 | c4748  | 1.11202637           | Putative uncharacterized protein OS=Escherichia coli O6 GN=c4748                                                                 |
| P39173     | yeaD   | 1.112404595          | Putative uncharacterized protein yeaD OS=Escherichia coli O6 GN=yeaD                                                             |
| P0ABQ2     | garR   | 1.116545823          | 2-hydroxy-3-oxopropionate reductase OS=Escherichia coli O6 GN=garR                                                               |
| P22255     | cysQ   | 1.116830736          | 3',5'-bisphosphate nucleotidase CysQ OS=Escherichia coli O6 GN=cysQ                                                              |
| P02358     | rpsF   | 1.123762801          | 30S ribosomal protein S6 OS=Escherichia coli O6 GN=rpsF                                                                          |
| P0ACF8     | hns    | 1.124572546          | DNA-binding protein H-NS OS=Escherichia coli O6 GN=hns                                                                           |
| P0AG18     | purE   | 1.125593608          | Phosphoribosylaminoimidazole carboxylase catalytic subunit OS=Escherichia coli O6 GN=purE                                        |
| W8ZX03     | yhdH   | 1.12832771           | Protein yhdH OS=Escherichia coli O6 GN=yhdH                                                                                      |
| P10371     | hisA   | 1.13013415           | 1-(5-phosphoribosyl)-5-[(5-phosphoribosylamino)methylideneamino]imidazole-4-carboxamide isomerase OS=Escherichia coli O6 GN=hisA |
| P33363     | bglX   | 1.130624263          | Periplasmic beta-glucosidase OS=Escherichia coli O6 GN=bglX                                                                      |
| P06988     | hisD   | 1.133114096          | Histidinol dehydrogenase OS=Escherichia coli O6 GN=hisD                                                                          |
| P0AE01     | trmJ   | 1.133970847          | tRNA (cytidine/uridine-2'-O-methyltransferase TrmJ OS=Escherichia coli O6 GN=trmJ                                                |
| P0AAZ4     | rarA   | 1.141221009          | Replication-associated recombination protein A OS=Escherichia coli O6 GN=rarA                                                    |
| P0A904     | trxB   | 1.143306904          | Thioredoxin reductase OS=Escherichia coli O6 GN=trxB                                                                             |
| P0A9M8     | pta    | 1.144532966          | Phosphate acetyltransferase OS=Escherichia coli O6 GN=pta                                                                        |

| Uniprot ID | Symbol | TMT ratio (high/low) | Protein description                                                                            |
|------------|--------|----------------------|------------------------------------------------------------------------------------------------|
| P0A879     | trpB   | 1.147323859          | Tryptophan synthase beta chain OS=Escherichia coli O6 GN=trpB                                  |
| P12281     | moeA   | 1.148606698          | Molybdopterin biosynthesis protein moeA OS=Escherichia coli O6 GN=moeA                         |
| P21151     | fadA   | 1.152002029          | 3-ketoacyl-CoA thiolase OS=Escherichia coli O6 GN=fadA                                         |
| P0A887     | ubiE   | 1.152765393          | Ubiquinone/menaquinone biosynthesis methyltransferase ubiE OS=Escherichia coli O6 GN=ubiE      |
| P39332     | yjgF   | 1.158961038          | RutC family protein yjgF OS=Escherichia coli O6 GN=yjgF                                        |
| P0AG80     | ugpB   | 1.162518068          | sn-glycerol-3-phosphate-binding periplasmic protein ugpB OS=Escherichia coli O6 GN=ugpB        |
| P0A858     | tpiA   | 1.162870128          | Triosephosphate isomerase OS=Escherichia coli O6 GN=tpiA                                       |
| P0AFG0     | nusG   | 1.163385311          | Transcription antitermination protein nusG OS=Escherichia coli O6 GN=nusG                      |
| P63177     | rlmB   | 1.166363593          | 23S rRNA (guanosine-2&#039;-O-)-methyltransferase RlmB OS=Escherichia coli O6 GN=rlmB          |
| P0ACB2     | hemB   | 1.167335127          | Delta-aminolevulinic acid dehydratase OS=Escherichia coli O6 GN=hemB                           |
| P60664     | hisF   | 1.169068547          | Imidazole glycerol phosphate synthase subunit hisF OS=Escherichia coli O6 GN=hisF              |
| P0A6Z1     | hscA   | 1.171886514          | Chaperone protein hscA OS=Escherichia coli O6 GN=hscA                                          |
| P0A7E5     | pyrG   | 1.181027205          | CTP synthase OS=Escherichia coli O6 GN=pyrG                                                    |
| P0AED0     | uspA   | 1.183775503          | Universal stress protein A OS=Escherichia coli O6 GN=uspA                                      |
| P26616     | maeA   | 1.18409828           | NAD-dependent malic enzyme OS=Escherichia coli O6 GN=maeA                                      |
| W8ZPZ2     | ybjU   | 1.184604857          | Low-specificity L-threonine aldolase OS=Escherichia coli O6 GN=ybjU                            |
| P0A9Z1     | glnB   | 1.187246161          | Nitrogen regulatory protein P-II 1 OS=Escherichia coli O6 GN=glnB                              |
| P0A6M8     | fusA   | 1.192931176          | Elongation factor G OS=Escherichia coli O6 GN=fusA                                             |
| P0AGJ5     | yfiF   | 1.19442217           | Hypothetical tRNA/rRNA methyltransferase yfiF OS=Escherichia coli O6 GN=yfiF                   |
| P0A993     | fbp    | 1.195165332          | Fructose-1,6-bisphosphatase class 1 OS=Escherichia coli O6 GN=fbp                              |
| P0AEP3     | galU   | 1.1972762            | UTP--glucose-1-phosphate uridylyltransferase OS=Escherichia coli O6 GN=galU                    |
| P11446     | argC   | 1.203881118          | N-acetyl-gamma-glutamyl-phosphate reductase OS=Escherichia coli O6 GN=argC                     |
| P0ACJ0     | lrp    | 1.207926893          | Leucine-responsive regulatory protein OS=Escherichia coli O6 GN=lrp                            |
| P36649     | yacK   | 1.209347625          | Blue copper oxidase cueO OS=Escherichia coli O6 GN=yacK                                        |
| P39831     | ydfG   | 1.210067388          | NADP-dependent L-serine/L-allo-threonine dehydrogenase ydfG OS=Escherichia coli O6 GN=ydfG     |
| P0AF12     | mtnN   | 1.211174935          | 5&#039;-methylthioadenosine/S-adenosylhomocysteine nucleosidase OS=Escherichia coli O6 GN=mtnN |
| P0C0L2     | osmC   | 1.211451658          | Osmotically inducible protein C OS=Escherichia coli O6 GN=osmC                                 |
| P08244     | pyrF   | 1.214203753          | Orotidine 5&#039;-phosphate decarboxylase OS=Escherichia coli O6 GN=pyrF                       |

| Uniprot ID | Symbol | TMT ratio (high/low) | Protein description                                                                               |
|------------|--------|----------------------|---------------------------------------------------------------------------------------------------|
| P0A7W7     | rpsH   | 1.22154099           | 30S ribosomal protein S8 OS=Escherichia coli O6 GN=rpsH                                           |
| P0AGC3     | sit    | 1.224184298          | Soluble lytic murein transglycosylase OS=Escherichia coli O6 GN=sit                               |
| P16095     | sdaA   | 1.225042706          | L-serine dehydratase 1 OS=Escherichia coli O6 GN=sdaA                                             |
| P0ABU0     | menB   | 1.225570979          | 1,4-Dihydroxy-2-naphthoyl-CoA synthase OS=Escherichia coli O6 GN=menB                             |
| P0A8E7     | yajQ   | 1.225648469          | UPF0234 protein yajQ OS=Escherichia coli O6 GN=yajQ                                               |
| P0A825     | glyA   | 1.225880166          | Serine hydroxymethyltransferase OS=Escherichia coli O6 GN=glyA                                    |
| P0A7V0     | rpsB   | 1.22695247           | 30S ribosomal protein S2 OS=Escherichia coli O6 GN=rpsB                                           |
| P0A9V1     | lptB   | 1.227846972          | Lipopolysaccharide export system ATP-binding protein LptB OS=Escherichia coli O6 GN=lptB          |
| P0A8G6     | wrbA   | 1.228610545          | Flavoprotein wrbA OS=Escherichia coli O6 GN=wrbA                                                  |
| P0AC33     | fumA   | 1.228987866          | Fumarate hydratase class I, aerobic OS=Escherichia coli O6 GN=fumA                                |
| P22259     | pckA   | 1.231991908          | Phosphoenolpyruvate carboxykinase [ATP] OS=Escherichia coli O6 GN=pckA                            |
| P0A9D8     | dapD   | 1.232254207          | 2,3,4,5-tetrahydropyridine-2,6-dicarboxylate N-succinyltransferase OS=Escherichia coli O6 GN=dapD |
| P62707     | gpmA   | 1.232752028          | 2,3-bisphosphoglycerate-dependent phosphoglycerate mutase OS=Escherichia coli O6 GN=gpmA          |
| P0AB91     | aroG   | 1.233656947          | Phospho-2-dehydro-3-deoxyheptonate aldolase OS=Escherichia coli O6 GN=aroG                        |
| P0A6B7     | iscS   | 1.233951516          | Cysteine desulfurase OS=Escherichia coli O6 GN=iscS                                               |
| A0A0H2VCZ2 | c4771  | 1.236148393          | Putative carboxymethylenebutenolidase OS=Escherichia coli O6 GN=c4771                             |
| P0A9L8     | proC   | 1.240281792          | Proline-5-carboxylate reductase OS=Escherichia coli O6 GN=proC                                    |
| P0A749     | murA   | 1.248930199          | UDP-N-acetylglucosamine 1-carboxyvinyltransferase OS=Escherichia coli O6 GN=murA                  |
| P0A910     | ompA   | 1.249058905          | Outer membrane protein A OS=Escherichia coli O6 GN=ompA                                           |
| P0A917     | ompX   | 1.249727018          | Outer membrane protein X OS=Escherichia coli O6 GN=ompX                                           |
| P0A7M6     | rpmC   | 1.257643641          | 50S ribosomal protein L29 OS=Escherichia coli O6 GN=rpmC                                          |
| W8ZQQ8     | prfA   | 1.257901772          | Peptide chain release factor 1 OS=Escherichia coli O6 GN=prfA                                     |
| P07639     | aroB   | 1.259202969          | 3-dehydroquinate synthase OS=Escherichia coli O6 GN=aroB                                          |
| P0A6V8     | glk    | 1.259384284          | Glucokinase OS=Escherichia coli O6 GN=glk                                                         |
| P06983     | hemC   | 1.268140463          | Porphobilinogen deaminase OS=Escherichia coli O6 GN=hemC                                          |
| P08142     | ilvB   | 1.268650864          | Acetolactate synthase isozyme I large subunit OS=Escherichia coli O6 GN=ilvB                      |
| P06999     | pfkB   | 1.275241236          | 6-phosphofructokinase isozyme 2 OS=Escherichia coli O6 GN=pfkB                                    |
| P60757     | hisG   | 1.27552843           | ATP phosphoribosyltransferase OS=Escherichia coli O6 GN=hisG                                      |

| Uniprot ID | Symbol | TMT ratio (high/low) | Protein description                                                                             |
|------------|--------|----------------------|-------------------------------------------------------------------------------------------------|
| P0A988     | dnaN   | 1.276640056          | DNA polymerase III subunit beta OS=Escherichia coli O6 GN=dnaN                                  |
| P0A9S3     | gatD   | 1.277692722          | Galactitol-1-phosphate 5-dehydrogenase OS=Escherichia coli O6 GN=gatD                           |
| P0A929     | yrdA   | 1.278250572          | Protein yrdA OS=Escherichia coli O6 GN=yrdA                                                     |
| P17952     | murC   | 1.279016014          | UDP-N-acetylmuramate--L-alanine ligase OS=Escherichia coli O6 GN=murC                           |
| P0AB80     | ilvE   | 1.279683062          | Branched-chain-amino-acid aminotransferase OS=Escherichia coli O6 GN=ilvE                       |
| P0ABD5     | accA   | 1.282931221          | Acetyl-coenzyme A carboxylase carboxyl transferase subunit alpha OS=Escherichia coli O6 GN=accA |
| P0A877     | trpA   | 1.283044503          | Tryptophan synthase alpha chain OS=Escherichia coli O6 GN=trpA                                  |
| P0ABF6     | cdd    | 1.284546277          | Cytidine deaminase OS=Escherichia coli O6 GN=cdd                                                |
| P22106     | asnB   | 1.285061968          | Asparagine synthetase B (Glutamine-hydrolyzing) OS=Escherichia coli O6 GN=asnB                  |
| P15042     | ligA   | 1.28525356           | DNA ligase OS=Escherichia coli O6 GN=ligA                                                       |
| P0A8D0     | nrdR   | 1.288073057          | Transcriptional repressor NrdR OS=Escherichia coli O6 GN=nrdR                                   |
| P0ACA3     | sspA   | 1.292797802          | Stringent starvation protein A OS=Escherichia coli O6 GN=sspA                                   |
| P0CE47     | tufA   | 1.295164496          | Elongation factor Tu OS=Escherichia coli O6 GN=tufA                                             |
| P30137     | thiE   | 1.298101601          | Thiamine-phosphate pyrophosphorylase OS=Escherichia coli O6 GN=thiE                             |
| P32132     | typA   | 1.303591024          | GTP-binding protein TypA/BipA OS=Escherichia coli O6 GN=typA                                    |
| P75913     | ghrA   | 1.306354008          | Glyoxylate/hydroxypyruvate reductase A OS=Escherichia coli O6 GN=ghrA                           |
| P75915     | ycdY   | 1.318890417          | Putative uncharacterized protein ycdY OS=Escherichia coli O6 GN=ycdY                            |
| P0A8M6     | yeeX   | 1.320450671          | UPF0265 protein yeeX OS=Escherichia coli O6 GN=yeeX                                             |
| P0AES6     | gyrB   | 1.323048259          | DNA gyrase subunit B OS=Escherichia coli O6 GN=gyrB                                             |
| A0A0H2VDG6 | c3746  | 1.324798525          | 2,5-diketo-D-gluconic acid reductase A OS=Escherichia coli O6 GN=c3746                          |
| P0A817     | metK   | 1.325136362          | S-adenosylmethionine synthase OS=Escherichia coli O6 GN=metK                                    |
| P0AC69     | grxD   | 1.332472152          | Glutaredoxin-4 OS=Escherichia coli O6 GN=grxD                                                   |
| W9AM00     | rph    | 1.332593529          | Ribonuclease PH OS=Escherichia coli O6 GN=rph                                                   |
| P0AET8     | hdhA   | 1.332697936          | 7-alpha-hydroxysteroid dehydrogenase OS=Escherichia coli O6 GN=hdhA                             |
| P23721     | serC   | 1.34372124           | Phosphoserine aminotransferase OS=Escherichia coli O6 GN=serC                                   |
| P25437     | frmA   | 1.349739632          | S-(hydroxymethyl)glutathione dehydrogenase OS=Escherichia coli O6 GN=frmA                       |
| P0A6L0     | deoC   | 1.35351322           | Deoxyribose-phosphate aldolase OS=Escherichia coli O6 GN=deoC                                   |
| P45799     | yrfE   | 1.354065155          | ADP compounds hydrolase nudE OS=Escherichia coli O6 GN=yrfE                                     |
| W8ZG87     | ybiC   | 1.363678948          | Hypothetical oxidoreductase ybiC OS=Escherichia coli O6 GN=ybiC                                 |

| Uniprot ID | Symbol | TMT ratio (high/low) | Protein description                                                                  |
|------------|--------|----------------------|--------------------------------------------------------------------------------------|
| P0AC41     | sdhA   | 1.365016979          | Succinate dehydrogenase flavoprotein subunit OS=Escherichia coli O6 GN=sdhA          |
| P37666     | ghrB   | 1.366973445          | Glyoxylate/hydroxypyruvate reductase B OS=Escherichia coli O6 GN=ghrB                |
| P0A6B4     | alr    | 1.378001301          | Alanine racemase, biosynthetic OS=Escherichia coli O6 GN=alr                         |
| P0ADP0     | yigB   | 1.384491892          | Putative uncharacterized protein yigB OS=Escherichia coli O6 GN=yigB                 |
| P0ACF0     | hupA   | 1.38702387           | DNA-binding protein HU-alpha OS=Escherichia coli O6 GN=hupA                          |
| P08622     | dnaJ   | 1.389330207          | Chaperone protein dnaJ OS=Escherichia coli O6 GN=dnaJ                                |
| P05852     | yqjD   | 1.389732842          | Uncharacterized protein yqjD OS=Escherichia coli O6 GN=yqjD                          |
| P25745     | mnmA   | 1.392851194          | tRNA-specific 2-thiouridylase mnmA OS=Escherichia coli O6 GN=mnmA                    |
| P0AGL7     | rsmE   | 1.393882903          | Ribosomal RNA small subunit methyltransferase E OS=Escherichia coli O6 GN=rsmE       |
| P07003     | poxB   | 1.396493734          | Pyruvate dehydrogenase (Cytochrome) OS=Escherichia coli O6 GN=poxB                   |
| P0A9A6     | ftsZ   | 1.407596714          | Cell division protein ftsZ OS=Escherichia coli O6 GN=ftsZ                            |
| P0A6H5     | hslU   | 1.409506821          | ATP-dependent protease ATPase subunit HslU OS=Escherichia coli O6 GN=hslU            |
| P08200     | icdA   | 1.412559707          | Isocitrate dehydrogenase (NADP) OS=Escherichia coli O6 GN=icdA                       |
| P07650     | deoA   | 1.418720272          | Thymidine phosphorylase OS=Escherichia coli O6 GN=deoA                               |
| P16456     | selD   | 1.425749282          | Selenide, water dikinase OS=Escherichia coli O6 GN=selD                              |
| P67826     | cutC   | 1.427459354          | Copper homeostasis protein CutC OS=Escherichia coli O6 GN=cutC                       |
| P62617     | ispF   | 1.427640495          | 2-C-methyl-D-erythritol 2,4-cyclodiphosphate synthase OS=Escherichia coli O6 GN=ispF |
| P0A6P9     | eno    | 1.430724867          | Enolase OS=Escherichia coli O6 GN=eno                                                |
| P76138     | ynel   | 1.432992723          | Aldehyde-dehydrogenase like protein ynel OS=Escherichia coli O6 GN=ynel              |
| P07012     | prfB   | 1.439528443          | Peptide chain release factor 2 OS=Escherichia coli O6 GN=prfB                        |
| P23843     | oppA   | 1.440141763          | Periplasmic oligopeptide-binding protein OS=Escherichia coli O6 GN=oppA              |
| P17115     | gutQ   | 1.44999015           | GutQ protein OS=Escherichia coli O6 GN=gutQ                                          |
| P0AGK8     | iscR   | 1.453345032          | HTH-type transcriptional regulator iscR OS=Escherichia coli O6 GN=iscR               |
| P00547     | thrB   | 1.460733836          | Homoserine kinase OS=Escherichia coli O6 GN=thrB                                     |
| P0AGG8     | tldD   | 1.473809929          | Protein tldD OS=Escherichia coli O6 GN=tldD                                          |
| P0A6RO     | fabH   | 1.477338782          | 3-oxoacyl-[acyl-carrier-protein] synthase 3 OS=Escherichia coli O6 GN=fabH           |
| W9AHZ8     | yfbT   | 1.483138855          | Protein yfbT OS=Escherichia coli O6 GN=yfbT                                          |
| P0ABK5     | cysK   | 1.49081925           | Cysteine synthase A OS=Escherichia coli O6 GN=cysK                                   |

| Uniprot ID | Symbol | TMT ratio (high/low) | Protein description                                                                       |
|------------|--------|----------------------|-------------------------------------------------------------------------------------------|
| P39406     | rsmC   | 1.49279829           | Ribosomal RNA small subunit methyltransferase C OS=Escherichia coli O6 GN=rsmC            |
| P0AG07     | rpe    | 1.49781747           | Ribulose-phosphate 3-epimerase OS=Escherichia coli O6 GN=rpe                              |
| P0AG84     | yghA   | 1.502199945          | Hypothetical oxidoreductase yghA OS=Escherichia coli O6 GN=yghA                           |
| P0AE18     | map    | 1.509471563          | Methionine aminopeptidase OS=Escherichia coli O6 GN=map                                   |
| P0A6D3     | aroA   | 1.511848107          | 3-phosphoshikimate 1-carboxyvinyltransferase OS=Escherichia coli O6 GN=aroA               |
| P0AFK0     | pmbA   | 1.518968394          | PmbA protein OS=Escherichia coli O6 GN=pmbA                                               |
| W8ZXE6     | yraL   | 1.519001159          | Putative uncharacterized protein yraL OS=Escherichia coli O6 GN=yraL                      |
| P75949     | nagZ   | 1.5233278            | Beta-hexosaminidase OS=Escherichia coli O6 GN=nagZ                                        |
| P00934     | thrC   | 1.528649931          | Threonine synthase OS=Escherichia coli O6 GN=thrC                                         |
| P0AFR4     | yciO   | 1.529271491          | Uncharacterized protein yciO OS=Escherichia coli O6 GN=yciO                               |
| P04391     | argI   | 1.546772025          | Ornithine carbamoyltransferase OS=Escherichia coli O6 GN=argI                             |
| P0AAB6     | galF   | 1.551110305          | UTP--glucose-1-phosphate uridylyltransferase OS=Escherichia coli O6 GN=galF               |
| P37686     | yiaY   | 1.552589159          | Probable alcohol dehydrogenase OS=Escherichia coli O6 GN=yiaY                             |
| P0A717     | prs    | 1.557467971          | Ribose-phosphate pyrophosphokinase OS=Escherichia coli O6 GN=prs                          |
| P0A953     | fabB   | 1.55911121           | 3-oxoacyl-[acyl-carrier-protein] synthase 1 OS=Escherichia coli O6 GN=fabB                |
| P18196     | minC   | 1.567544888          | Septum site-determining protein minC OS=Escherichia coli O6 GN=minC                       |
| P0A7A2     | gpmB   | 1.569220902          | Probable phosphoglycerate mutase gpmB OS=Escherichia coli O6 GN=gpmB                      |
| P0A6H1     | clpX   | 1.570297548          | ATP-dependent Clp protease ATP-binding subunit ClpX OS=Escherichia coli O6 GN=clpX        |
| P0A7G6     | recA   | 1.571139306          | Protein recA OS=Escherichia coli O6 GN=recA                                               |
| P75957     | lolD   | 1.583522627          | Lipoprotein-releasing system ATP-binding protein LolD OS=Escherichia coli O6 GN=lolD      |
| P06720     | meIA   | 1.5881827            | Alpha-galactosidase OS=Escherichia coli O6 GN=meIA                                        |
| P0AB71     | fba    | 1.588916628          | Fructose-bisphosphate aldolase class II OS=Escherichia coli O6 GN=fba                     |
| P0AEK4     | fabI   | 1.609352724          | Enoyl-[acyl-carrier-protein] reductase (NADH) OS=Escherichia coli O6 GN=fabI              |
| P05791     | ilvD   | 1.627868645          | Dihydroxy-acid dehydratase OS=Escherichia coli O6 GN=ilvD                                 |
| P0A9T0     | serA   | 1.631145487          | D-3-phosphoglycerate dehydrogenase OS=Escherichia coli O6 GN=serA                         |
| P0ABU2     | ychF   | 1.653265885          | Probable GTP-binding protein ychF OS=Escherichia coli O6 GN=ychF                          |
| P0ACB0     | dnaB   | 1.655769338          | Replicative DNA helicase OS=Escherichia coli O6 GN=dnaB                                   |
| P21645     | lpxD   | 1.662288392          | UDP-3-O-[3-hydroxymyristoyl] glucosamine N-acyltransferase OS=Escherichia coli O6 GN=lpxD |



| Uniprot ID | Symbol | TMT ratio (high/low) | Protein description                                                                                  |
|------------|--------|----------------------|------------------------------------------------------------------------------------------------------|
| P0AAI9     | fabD   | 1.664100661          | Malonyl CoA-acyl carrier protein transacylase OS=Escherichia coli O6 GN=fabD                         |
| P0A867     | talA   | 1.665675601          | Transaldolase A OS=Escherichia coli O6 GN=talA                                                       |
| P60716     | lipA   | 1.675071934          | Lipoyl synthase OS=Escherichia coli O6 GN=lipA                                                       |
| P09832     | gltD   | 1.676358545          | Glutamate synthase [NADPH] small chain OS=Escherichia coli O6 GN=gltD                                |
| P0A940     | yaeT   | 1.678509009          | Outer membrane protein assembly factor yaeT OS=Escherichia coli O6 GN=yaeT                           |
| P46837     | yhgF   | 1.682844027          | Protein yhgF OS=Escherichia coli O6 GN=yhgF                                                          |
| A0A0H2V801 | c1628  | 1.713548636          | Protein ycgM OS=Escherichia coli O6 GN=c1628                                                         |
| P0AC13     | folP   | 1.721363234          | Dihydropteroate synthase OS=Escherichia coli O6 GN=folP                                              |
| P28861     | fpr    | 1.723282389          | Ferredoxin--NADP reductase OS=Escherichia coli O6 GN=fpr                                             |
| P0A7D7     | purC   | 1.724075015          | Phosphoribosylaminoimidazole-succinocarboxamide synthase OS=Escherichia coli O6 GN=purC              |
| P21179     | katE   | 1.734845802          | Catalase HPII OS=Escherichia coli O6 GN=katE                                                         |
| P05793     | ilvC   | 1.746917834          | Ketol-acid reductoisomerase OS=Escherichia coli O6 GN=ilvC                                           |
| P0AEZ3     | minD   | 1.7782961            | Septum site-determining protein minD OS=Escherichia coli O6 GN=minD                                  |
| P13482     | treA   | 1.783834023          | Periplasmic trehalase OS=Escherichia coli O6 GN=treA                                                 |
| P25516     | acnA   | 1.803864059          | Aconitate hydratase 1 OS=Escherichia coli O6 GN=acnA                                                 |
| P76034     | yciT   | 1.810665341          | Hypothetical transcriptional regulator yciT OS=Escherichia coli O6 GN=yciT                           |
| W8ZF88     | thiJ   | 1.868435423          | 4-methyl-5(B-hydroxyethyl)-thiazole monophosphate biosynthesis enzyme OS=Escherichia coli O6 GN=thiJ |
| P0A805     | frr    | 1.874556937          | Ribosome-recycling factor OS=Escherichia coli O6 GN=frr                                              |
| P62620     | ispG   | 1.88190573           | 4-hydroxy-3-methylbut-2-en-1-yl diphosphate synthase OS=Escherichia coli O6 GN=ispG                  |
| P0A8Y5     | yidA   | 1.898055215          | Phosphatase YidA OS=Escherichia coli O6 GN=yidA                                                      |
| P31808     | yciK   | 1.904054081          | Hypothetical oxidoreductase yciK OS=Escherichia coli O6 GN=yciK                                      |
| P18843     | nadE   | 1.913925645          | NH(3)-dependent NAD(+) synthetase OS=Escherichia coli O6 GN=nadE                                     |
| P17993     | ubiG   | 1.920751893          | 3-demethylubiquinone-9 3-methyltransferase OS=Escherichia coli O6 GN=ubiG                            |
| P0A812     | ruvB   | 1.925044994          | Holliday junction ATP-dependent DNA helicase ruvB OS=Escherichia coli O6 GN=ruvB                     |
| P77318     | ydeN   | 1.926846936          | Putative sulfatase ydeN OS=Escherichia coli O6 GN=ydeN                                               |
| P0ACR9     | mprA   | 1.946235523          | Transcriptional repressor mprA OS=Escherichia coli O6 GN=mprA                                        |
| P30138     | thiF   | 1.975714638          | Adenylyltransferase thiF OS=Escherichia coli O6 GN=thiF                                              |
| W8ZIH4     | ycjG   | 1.97572368           | Putative uncharacterized protein ycjG OS=Escherichia coli O6 GN=ycjG                                 |

| Uniprot ID | Symbol | TMT ratio (high/low) | Protein description                                                              |
|------------|--------|----------------------|----------------------------------------------------------------------------------|
| A0A0H2V8T6 | c2543  | 2.002115785          | Protein yeeZ OS=Escherichia coli O6 GN=c2543                                     |
| P0AC59     | grxB   | 2.092678674          | Glutaredoxin-2 OS=Escherichia coli O6 GN=grxB                                    |
| A0A0H2V747 | c1657  | 2.112322267          | Protein ycgS OS=Escherichia coli O6 GN=c1657                                     |
| P60560     | guaC   | 2.167848194          | GMP reductase OS=Escherichia coli O6 GN=guaC                                     |
| P0A715     | kdsA   | 2.277294673          | 2-dehydro-3-deoxyphosphooctonate aldolase OS=Escherichia coli O6 GN=kdsA         |
| P64483     | yeaK   | 2.339571121          | Putative uncharacterized protein yeaK OS=Escherichia coli O6 GN=yeaK             |
| P0C8J6     | gatY   | 2.348729289          | D-tagatose-1,6-bisphosphate aldolase subunit GatY OS=Escherichia coli O6 GN=gatY |
| P22333     | add    | 2.380391678          | Adenosine deaminase OS=Escherichia coli O6 GN=add                                |
| P0ACG1     | stpA   | 2.427237387          | DNA-binding protein stpA OS=Escherichia coli O6 GN=stpA                          |
| P17444     | betA   | 2.436059284          | Choline dehydrogenase OS=Escherichia coli O6 GN=betA                             |
| P31678     | otsB   | 2.554313161          | Trehalose-phosphatase OS=Escherichia coli O6 GN=otsB                             |
| P36683     | acnB   | 2.557021875          | Aconitate hydratase 2 OS=Escherichia coli O6 GN=acnB                             |
| P0A9X4     | mreB   | 2.681184522          | Rod shape-determining protein mreB OS=Escherichia coli O6 GN=mreB                |
| P0AA16     | ompR   | 3.953794376          | Transcriptional regulatory protein ompR OS=Escherichia coli O6 GN=ompR           |
